# Supplementary material
Source: PubMed Central journal article supplement (PMC9360462)
Supplement: djac091_supplementary_data.pdf [file djac091_supplementary_data.pdf]

## **Supplementary Material**

### **Subsequent primary cancer risk among five-year survivors of adolescent and young adult cancers**

Hyuna Sung<sup>1</sup>; Rebecca L. Siegel<sup>1</sup>; Noorie Hyun<sup>2</sup>; Kimberly D. Miller<sup>1</sup>; K. Robin Yabroff<sup>1</sup>;  
Ahmedin Jemal<sup>1</sup>

<sup>1</sup>Surveillance and Health Equity Science, American Cancer Society, Atlanta, GA; <sup>2</sup>Division of Biostatistics, Kaiser Permanente Washington Health Research Institute, Seattle, WA, US

### **Supplementary Methods**

Cumulative incidence and corresponding 95% CI of overall subsequent primary cancers (SPCs, excluding same-site SPC and non-melanoma skin cancer) were estimated by first primary adolescent and young adult (AYA) cancer, based on the time from 5<sup>th</sup> anniversary of the index cancer diagnosis to the first SPC occurrence after cohort entry, while treating death from any cause was treated as a competing risk. For cumulative mortality from SPC, death from non-first primary cancer (non-index cancer) was treated as an event and death from all other causes was treated as a competing risk. Survivors were censored at the date of lost follow-up, death date from unknown and miscellaneous cancer death (due to higher chance of dying from non-SPC), and the end date of the study, whichever came first.

To explore the stage distribution of SPCs at diagnosis, stage-specific risks of developing SPCs were examined. Stage at SPC diagnosis (localized, regional, distant, and unknown) was based on SEER Historic Stage A. SPCs coded as “Blank(s)” for stage were excluded in this analyses as they are from certain site/year combinations that were not covered by SEER Historic Stage A [1]. This analysis was performed among all survivors combined for the top five SPCs that

accounted for the highest proportions of all excess cases (lung, breast, colorectum, thyroid, and head and neck), with the exclusion of survivors whose first primary cancer are the same-type of SPC in question.

For the analyses stratified by treatment era and treatment group, we restricted our attention to top 10 most common AYA cancers (female breast, thyroid, testis, cervix uteri, non-Hodgkin lymphoma, Hodgkin lymphoma, brain and other nervous system, and colorectum) and the top 5 SPCs of the highest proportions of all excess cases. We excluded survivors of melanoma of the skin in the stratified analysis by treatment group because the majority of survivors (n=23,719, 99%) were reported to have received neither chemotherapy nor radiotherapy. Survivors were divided into 4 groups based on reported initial treatment: radiotherapy alone (no or unknown chemotherapy), chemotherapy alone (no or unknown radiotherapy), both (radiotherapy yes and yes chemotherapy), neither (no or unknown radiotherapy or chemotherapy).

Associations of treatment era or treatment group with the risk of developing SPCs were examined by comparing SIRs stratified by treatment era (1975-1986, 1987-1999, 2000-2013) or treatment group in multi-variate Poisson regression models. Models were adjusted for sex (when appropriate), age at first primary malignancy (15-29,  $\geq 30$  years), and time since first cancer diagnosis (60-239,  $\geq 240$  months) through stratification, with the inclusion of the log of the expected number of cases as an offset to indirectly adjust for attained age and calendar year [2]. Two-sided P-values for heterogeneity in SIRs by treatment group were based on a likelihood ratio statistic comparing model fit with and without the variable of interest.

All SIRs, AElS, SMRs, and AEMs were calculated using "MP-SIR" session of SEER\*Stat 8.3.9, cumulative incidence was calculated using Stata version 13, and all multi-variate models were fitted using SAS version 9.4. A two-sided P-value  $< 0.05$  was considered statistically significant.

### Supplementary references

1. The SEER Variable and Recode Definitions on the SEER Historic Stage A  
[https://seer.cancer.gov/seerstat/variables/seer/yr1973\\_2009/lrd\\_stage/index.html](https://seer.cancer.gov/seerstat/variables/seer/yr1973_2009/lrd_stage/index.html).
2. Yasui Y, Liu Y, Neglia JP, *et al*. A methodological issue in the analysis of second-primary cancer incidence in long-term survivors of childhood cancers. *Am J Epidemiol* 2003;158(11):1108-13.
3. Curtis RE, Freedman DM, Ron E, Ries LAG, Hacker DG, Edwards BK, Tucker MA, Fraumeni JF Jr. (eds). *New Malignancies Among Cancer Survivors: SEER Cancer Registries, 1973-2000*. National Cancer Institute, NIH Publ. No. 05-5302. Bethesda, MD, 2006.
4. Rostgaard K. Methods for stratification of person-time and events - a prerequisite for Poisson regression and SIR estimation. *Epidemiol Perspect Innov* 2008;5:7.

Supplementary Table 1. Frequencies and study inclusion status of first primary invasive cancers diagnosed at aged 15 to 39 years in 1975-2013 in 9 SEER registries

|                                                   | Male and female |      | Female          |      | Male            |      |
|---------------------------------------------------|-----------------|------|-----------------|------|-----------------|------|
|                                                   | N               | %    | N               | %    | N               | %    |
| Total, N                                          | 174671          |      | 108295          |      | 66376           |      |
| Frist primary cancers included in the study       |                 |      |                 |      |                 |      |
| Breast                                            | 27236           | 15.6 | 27176           | 25.1 | 60 <sup>a</sup> | 0.1  |
| Melanoma of the Skin                              | 24000           | 13.7 | 14879           | 13.7 | 9121            | 13.7 |
| Thyroid                                           | 23408           | 13.4 | 19077           | 17.6 | 4331            | 6.5  |
| Testis                                            | 16501           | 9.4  | -               | -    | 16501           | 24.9 |
| Hodgkin Lymphoma                                  | 13404           | 7.7  | 6550            | 6.0  | 6854            | 10.3 |
| Cervix Uteri                                      | 10314           | 5.9  | 10314           | 9.5  | -               | -    |
| Non-Hodgkin Lymphoma                              | 9474            | 5.4  | 3848            | 3.6  | 5626            | 8.5  |
| Non-Hodgkin Lymphoma                              | 9204            | 5.3  | 3764            | 3.5  | 5440            | 8.2  |
| Chronic Lymphocytic Leukemia                      | 270             | 0.2  | 84              | 0.1  | 186             | 0.3  |
| Brain and Cranial Nerves Other Nervous System     | 6499            | 3.7  | 2941            | 2.7  | 3558            | 5.4  |
| Colon and Rectum                                  | 5843            | 3.3  | 2906            | 2.7  | 2937            | 4.4  |
| Ovary                                             | 4066            | 2.3  | 4066            | 3.8  | -               | -    |
| Head and Neck                                     | 4683            | 2.7  | 2092            | 1.9  | 2591            | 3.9  |
| Oral Cavity and Pharynx                           | 3974            | 2.3  | 1818            | 1.7  | 2156            | 3.2  |
| Nose, Nasal Cavity and Middle Ear                 | 309             | 0.2  | 147             | 0.1  | 162             | 0.2  |
| Larynx                                            | 400             | 0.2  | 127             | 0.1  | 273             | 0.4  |
| Corpus Uteri, NOS                                 | 3608            | 2.1  | 3608            | 3.3  | -               | -    |
| Soft Tissue including Heart                       | 3207            | 1.8  | 1480            | 1.4  | 1727            | 2.6  |
| Kidney and Renal Pelvis                           | 2916            | 1.7  | 1275            | 1.2  | 1641            | 2.5  |
| Urinary Bladder, Ureter, Other Urinary Organs     | 2709            | 1.6  | 713             | 0.7  | 1996            | 3.0  |
| Bones and Joints                                  | 1978            | 1.1  | 811             | 0.7  | 1167            | 1.8  |
| Kaposi Sarcoma                                    | 1586            | 0.9  | 25 <sup>a</sup> | 0.0  | 1561            | 2.4  |
| Lung and Bronchus                                 | 1456            | 0.8  | 788             | 0.7  | 668             | 1.0  |
| Acute Myeloid Leukemia and Acute Myeloid Leukemia | 1477            | 0.8  | 770             | 0.7  | 707             | 1.1  |
| Acute Myeloid Leukemia                            | 1411            | 0.8  | 737             | 0.7  | 674             | 1.0  |
| Acute Monocytic Leukemia                          | 66              | 0.0  | 33              | 0.0  | 33              | 0.0  |
| Chronic Myeloid Leukemia                          | 1259            | 0.7  | 496             | 0.5  | 763             | 1.1  |
| Acute Lymphocytic Leukemia                        | 1113            | 0.6  | 416             | 0.4  | 697             | 1.1  |
| Stomach                                           | 566             | 0.3  | 296             | 0.3  | 270             | 0.4  |
| Vagina, Vulva, and Other Female Genital Organs    | 1123            | 0.6  | 1123            | 1.0  | -               | -    |
| Eye and Orbit                                     | 562             | 0.3  | 293             | 0.3  | 269             | 0.4  |
| Myeloma                                           | 478             | 0.3  | 192             | 0.2  | 286             | 0.4  |
| Small Intestine                                   | 390             | 0.2  | 188             | 0.2  | 202             | 0.3  |
| Pancreas                                          | 333             | 0.2  | 203             | 0.2  | 130             | 0.2  |
| Anus, Anal Canal and Anorectum                    | 300             | 0.2  | 121             | 0.1  | 179             | 0.3  |
| Frist primary cancers excluded from the study     |                 |      |                 |      |                 |      |
| Other Endocrine Organs                            | 433             | 0.2  | 149             | 0.1  | 284             | 0.4  |

|                                  |      |     |     |     |     |     |
|----------------------------------|------|-----|-----|-----|-----|-----|
| Other Respiratory Organs         | 309  | 0.2 | 38  | 0.0 | 271 | 0.4 |
| Other Digestive Organs           | 304  | 0.2 | 150 | 0.1 | 154 | 0.2 |
| Other Lymphocytic Leukemia       | 288  | 0.2 | 67  | 0.1 | 221 | 0.3 |
| Liver                            | 223  | 0.1 | 100 | 0.1 | 123 | 0.2 |
| Thymus                           | 214  | 0.1 | 93  | 0.1 | 121 | 0.2 |
| Prostate                         | 207  | 0.1 | -   | -   | 207 | 0.3 |
| Aleukemic, Subleukemic and NOS   | 105  | 0.1 | 53  | 0.0 | 52  | 0.1 |
| Esophagus                        | 94   | 0.1 | 16  | 0.0 | 78  | 0.1 |
| Other Acute Leukemia             | 84   | 0.0 | 38  | 0.0 | 46  | 0.1 |
| Mesothelioma                     | 69   | 0.0 | 44  | 0.0 | 25  | 0.0 |
| Other Male Genital Organs        | 67   | 0.0 | -   | -   | 67  | 0.1 |
| Penis                            | 63   | 0.0 | -   | -   | 63  | 0.1 |
| Other Myeloid/Monocytic Leukemia | 62   | 0.0 | 31  | 0.0 | 31  | 0.0 |
| Other Biliary                    | 56   | 0.0 | 25  | 0.0 | 31  | 0.0 |
| Gallbladder                      | 41   | 0.0 | 27  | 0.0 | 14  | 0.0 |
| Intrahepatic Bile Duct           | 20   | 0.0 | 8   | 0.0 | 12  | 0.0 |
| Miscellaneous                    | 1543 | 0.9 | 809 | 0.7 | 734 | 1.1 |

NOTE Refer to the Site Recode ICD-O-3/WHO 2008 Definition by SEER program ([https://seer.cancer.gov/siterecode/icdo3\\_dwho/home/index.html](https://seer.cancer.gov/siterecode/icdo3_dwho/home/index.html)) for ICD-O-3 Site and Histology (Type) code used to classify primary sites.

<sup>a</sup>Excluded from the study

Supplementary Table 2. Definition of same-type cancer when it is different for first primary cancer and subsequent primary cancer

| Frist primary cancer                                | Definitions of the same-type subsequent primary cancer                                                                                                        |
|-----------------------------------------------------|---------------------------------------------------------------------------------------------------------------------------------------------------------------|
| Colon and Rectum                                    | Colon and Rectum, Anus, Anal Canal and Anorectum                                                                                                              |
| Lung and Bronchus                                   | Incidence: Lung and Bronchus<br>Mortality: Lung and Bronchus, Trachea, Mediastinum and Other Respiratory Organs                                               |
| Cervix Uteri                                        | Cervix Uteri; Corpus and Uterus, NOS; Ovary                                                                                                                   |
| Corpus and Uterus, Not Otherwise Specified          |                                                                                                                                                               |
| Ovary                                               |                                                                                                                                                               |
| Non-Hodgkin Lymphoma                                | Non-Hodgkin Lymphoma, Myeloma                                                                                                                                 |
| Myeloma                                             |                                                                                                                                                               |
| Acute Myeloid Leukemia and Acute Monocytic Leukemia | Acute Myeloid Leukemia; Acute Monocytic Leukemia; Chronic Myeloid Leukemia; Other Acute Leukemia; Aleukemic, Subleukemic and Not Otherwise Specified Leukemia |
| Chronic Myeloid Leukemia                            |                                                                                                                                                               |
| Acute Lymphocytic Leukemia                          | Acute Lymphocytic Leukemia; Other Lymphocytic Leukemia; Aleukemic, Subleukemic and Not Otherwise Specified                                                    |

NOTE For some first primary cancer types, we extended the definition of same-type cancer to adjacent anatomical subsites to reduce bias due to heightened medical surveillance, as well as artifactually decreased risks due to surgical resection of nearby organs. For example, the uterus and ovaries are all often surgically removed during treatment for gynecologic cancers and the lower part of rectum close to the anus is removed during treatment for colorectal cancer. All myeloid/monocytic leukemias were considered as same-type cancers as first primary acute myeloid/monocytic leukemia and chronic myeloid leukemia, and all lymphocytic leukemias were considered as same-type cancers as first primary acute lymphocytic leukemia to reduce the bias from diagnostic misclassification [3].

Supplementary Table 3. Standardized incidence ratio (SIR), absolute excess incidence (AEI), standardized mortality ratio (SMR), and absolute excess mortality (AEM) and corresponding 95% confidence intervals for higher-than-expected type-specific subsequent primary cancer risk

| First primary cancer       | Subsequent primary cancer        | Obs | Exp. | Standardized incidence ratio (95% CI) | Absolute excess incidence per 10,000 (95% CI) | AEI (%) <sup>a</sup> | Obs. | Exp. | Standardized mortality ratio (95% CI) | AEM (95% CI)             | AE M (%) <sup>b</sup> | Person Years at Risk |
|----------------------------|----------------------------------|-----|------|---------------------------------------|-----------------------------------------------|----------------------|------|------|---------------------------------------|--------------------------|-----------------------|----------------------|
| Acute Lymphocytic Leukemia | Acute Non-Lymphocytic Leukemia   | <5  | <5   | 10 (2.1 to 29.2)                      | 2 (0.2 to 6.2)                                | 8.5                  | 8    | 0.2  | <b>50.2 (21.7 to 98.8)</b>            | <b>5.7 (2.4 to 11.3)</b> | 29.6                  | 13750                |
| Acute Lymphocytic Leukemia | Bones and Joints                 | <5  | <5   | 9 (0.2 to 49.9)                       | 0.6 (-0.1 to 4)                               | 2.8                  | <5   | <5   | 24.9 (0.6 to 138.6)                   | 0.7 (0 to 4)             | 3.6                   | 13750                |
| Acute Lymphocytic Leukemia | Brain and ONS                    | <5  | <5   | 4.2 (0.9 to 12.4)                     | 1.7 (-0.1 to 5.9)                             | 7.2                  | <5   | <5   | 10.8 (2.9 to 27.6)                    | 2.6 (0.5 to 7.2)         | 13.7                  | 13750                |
| Acute Lymphocytic Leukemia | Breast (F)                       | 9   | 5.2  | 1.7 (0.8 to 3.3)                      | 7.6 (-2.2 to 23.8)                            | 12.0                 | <5   | <5   | 5 (1 to 14.5)                         | 4.8 (0 to 16.4)          | 9.1                   | 4979                 |
| Acute Lymphocytic Leukemia | Chronic Myeloid Leukemia         | <5  | <5   | 17.5 (3.6 to 51.2)                    | 2.1 (0.3 to 6.3)                              | 8.9                  | 0    | -    | -                                     | -                        | -                     | 13750                |
| Acute Lymphocytic Leukemia | Colon and Rectum                 | <5  | <5   | 1.6 (0.4 to 4.1)                      | 1.1 (-1 to 5.6)                               | 4.8                  | 0    | -    | -                                     | -                        | -                     | 13750                |
| Acute Lymphocytic Leukemia | Esophagus                        | <5  | <5   | 4.1 (0.1 to 23)                       | 0.6 (-0.2 to 3.9)                             | 2.4                  | 0    | -    | -                                     | -                        | -                     | 13750                |
| Acute Lymphocytic Leukemia | Head and Neck                    | 8   | 1.3  | <b>6.3 (2.7 to 12.4)</b>              | <b>4.9 (1.6 to 10.5)</b>                      | 21.2                 | <5   | <5   | 4.7 (0.1 to 26.5)                     | 0.6 (-0.1 to 3.9)        | 3.0                   | 13750                |
| Acute Lymphocytic Leukemia | Kidney and Renal Pelvis          | <5  | <5   | 1.7 (0.2 to 6.2)                      | 0.6 (-0.7 to 4.4)                             | 2.6                  | 0    | -    | -                                     | -                        | -                     | 13750                |
| Acute Lymphocytic Leukemia | Liver and Intrahepatic Bile Duct | <5  | <5   | 2 (0.1 to 11.3)                       | 0.4 (-0.3 to 3.7)                             | 1.6                  | <5   | <5   | 3.1 (0.1 to 17.3)                     | 0.5 (-0.2 to 3.8)        | 2.6                   | 13750                |
| Acute Lymphocytic Leukemia | Non-Hodgkin Lymphoma             | 0   | -    | -                                     | -                                             | -                    | <5   | <5   | 3.8 (0.1 to 21)                       | 0.5 (-0.2 to 3.9)        | 2.8                   | 13750                |
| Acute Lymphocytic Leukemia | Pancreas                         | <5  | <5   | 1.9 (0 to 10.5)                       | 0.3 (-0.4 to 3.7)                             | 1.5                  | <5   | <5   | 2.6 (0.1 to 14.3)                     | 0.4 (-0.3 to 3.8)        | 2.3                   | 13750                |
| Acute Lymphocytic Leukemia | Prostate                         | <5  | <5   | 1 (0.2 to 3.1)                        | 0.2 (-2.6 to 6.7)                             | 0.4                  | <5   | <5   | 21.7 (2.6 to 78.3)                    | 2.2 (0.2 to 8.1)         | 7.2                   | 8772                 |
| Acute Lymphocytic Leukemia | Small Intestine                  | <5  | <5   | 6.3 (0.2 to 35.3)                     | 0.6 (-0.1 to 3.9)                             | 2.7                  | 0    | -    | -                                     | -                        | -                     | 13750                |
| Acute Lymphocytic Leukemia | Thyroid                          | 6   | 1.9  | <b>3.2 (1.2 to 7)</b>                 | <b>3 (0.2 to 8.1)</b>                         | 13.0                 | 0    | -    | -                                     | -                        | -                     | 13750                |
| Acute Lymphocytic Leukemia | Urinary Bladder                  | <5  | <5   | 1.2 (0 to 6.6)                        | 0.1 (-0.6 to 3.4)                             | 0.5                  | 0    | -    | -                                     | -                        | -                     | 13750                |
| Acute Myeloid Leukemia     | Acute Lymphocytic Leukemia       | <5  | <5   | 8.5 (0.2 to 47.5)                     | 0.5 (-0.1 to 3.2)                             | 1.9                  | 5    | 0.1  | <b>83.8 (27.2 to 195.6)</b>           | <b>2.9 (0.9 to 6.8)</b>  | 19.9                  | 17141                |
| Acute Myeloid Leukemia     | Bones and Joints                 | 0   | -    | -                                     | -                                             | -                    | <5   | <5   | 21.4 (0.5 to 119.4)                   | 0.6 (0 to 3.2)           | 3.8                   | 17141                |
| Acute Myeloid Leukemia     | Brain and ONS                    | <5  | <5   | 1 (0 to 5.7)                          | 0 (-0.6 to 2.7)                               | 0.1                  | <5   | <5   | 1.7 (0 to 9.7)                        | 0.2 (-0.3 to 2.9)        | 1.7                   | 17141                |
| Acute Myeloid Leukemia     | Breast (F)                       | 27  | 12.5 | <b>2.2 (1.4 to 3.1)</b>               | <b>16.1 (5.9 to 29.7)</b>                     | 30.7                 | <5   | <5   | 1.3 (0.2 to 4.7)                      | 0.5 (-1.4 to 6.3)        | 1.9                   | 9026                 |
| Acute Myeloid Leukemia     | Colon and Rectum                 | <5  | <5   | 0.9 (0.2 to 2.3)                      | -0.3 (-2 to 3.4)                              | -                    | <5   | <5   | 3.4 (0.9 to 8.6)                      | 1.6 (-0.1 to 5.3)        | 11.3                  | 17141                |
| Acute Myeloid Leukemia     | Esophagus                        | <5  | <5   | 4.9 (0.6 to 17.9)                     | 0.9 (-0.1 to 4)                               | 3.4                  | 0    | -    | -                                     | -                        | -                     | 17141                |
| Acute Myeloid Leukemia     | Eye and Orbit                    | <5  | <5   | 8.3 (0.2 to 46.1)                     | 0.5 (-0.1 to 3.2)                             | 1.9                  | 0    | -    | -                                     | -                        | -                     | 17141                |
| Acute Myeloid Leukemia     | Head and Neck                    | 12  | 2.1  | <b>5.7 (2.9 to 9.9)</b>               | <b>5.8 (2.4 to 11)</b>                        | 20.9                 | <5   | <5   | 2.7 (0.1 to 15.1)                     | 0.4 (-0.2 to 3)          | 2.6                   | 17141                |
| Acute Myeloid Leukemia     | Hodgkin Lymphoma                 | <5  | <5   | 1.9 (0 to 10.4)                       | 0.3 (-0.3 to 2.9)                             | 1.0                  | 0    | -    | -                                     | -                        | -                     | 17141                |
| Acute Myeloid Leukemia     | Kidney and Renal Pelvis          | <5  | <5   | 2 (0.6 to 5.2)                        | 1.2 (-0.5 to 4.8)                             | 4.3                  | 0    | -    | -                                     | -                        | -                     | 17141                |
| Acute Myeloid Leukemia     | Liver and Intrahepatic Bile Duct | 6   | 0.9  | <b>6.8 (2.5 to 14.9)</b>              | <b>3 (0.8 to 7.1)</b>                         | 10.8                 | <5   | <5   | 5.2 (1.1 to 15.1)                     | 1.4 (0 to 4.8)           | 9.8                   | 17141                |
| Acute Myeloid Leukemia     | Lung and Bronchus                | 7   | 4.1  | 1.7 (0.7 to 3.5)                      | 1.7 (-0.8 to 6)                               | 6.1                  | 5    | 3.0  | 1.6 (0.5 to 3.8)                      | 1.1 (-0.8 to 5)          | 7.9                   | 17141                |
| Acute Myeloid Leukemia     | Non-Hodgkin Lymphoma             | <5  | <5   | 1.4 (0.4 to 3.5)                      | 0.6 (-1 to 4.3)                               | 2.4                  | <5   | <5   | 2.2 (0.1 to 12.5)                     | 0.3 (-0.2 to 3)          | 2.2                   | 17141                |
| Acute Myeloid Leukemia     | Pancreas                         | <5  | <5   | 1 (0 to 5.5)                          | 0 (-0.6 to 2.7)                               | -                    | <5   | <5   | 2.7 (0.3 to 9.6)                      | 0.7 (-0.3 to 3.8)        | 5.0                   | 17141                |

| First primary cancer   | Subsequent primary cancer        | Obs | Exp. | Standardized incidence ratio (95% CI) | Absolute excess incidence per 10,000 (95% CI) | AEI (%) <sup>a</sup> | Obs. | Exp. | Standardized mortality ratio (95% CI) | AEM (95% CI)              | AE M (%) <sup>b</sup> | Person Years at Risk |
|------------------------|----------------------------------|-----|------|---------------------------------------|-----------------------------------------------|----------------------|------|------|---------------------------------------|---------------------------|-----------------------|----------------------|
| Acute Myeloid Leukemia | Soft Tissue including Heart      | <5  | <5   | 4.3 (0.5 to 15.4)                     | 0.9 (-0.1 to 3.9)                             | 3.2                  | <5   | <5   | 6.1 (0.2 to 34.2)                     | 0.5 (-0.1 to 3.2)         | 3.4                   | 17141                |
| Acute Myeloid Leukemia | Stomach                          | <5  | <5   | 1.5 (0 to 8.4)                        | 0.2 (-0.4 to 2.9)                             | 0.7                  | <5   | <5   | 3.3 (0.1 to 18.3)                     | 0.4 (-0.2 to 3.1)         | 2.8                   | 17141                |
| Acute Myeloid Leukemia | Thyroid                          | 6   | 3.1  | 1.9 (0.7 to 4.2)                      | 1.7 (-0.5 to 5.8)                             | 6.1                  | 0    | -    | -                                     | -                         | -                     | 17141                |
| Acute Myeloid Leukemia | Vagina and Vulva                 | <5  | <5   | 3 (0.1 to 16.5)                       | 0.7 (-0.3 to 5.8)                             | 1.4                  | 0    | -    | -                                     | -                         | -                     | 9026                 |
| Anus                   | Breast (F)                       | <5  | <5   | 1.1 (0.3 to 2.9)                      | 2.8 (-15.4 to 41.8)                           | 1.6                  | 0    | -    | -                                     | -                         | -                     | 1599                 |
| Anus                   | Colon and Rectum                 | <5  | <5   | 1.3 (0.2 to 4.6)                      | 1.2 (-3.5 to 15)                              | 1.6                  | 11   | 0.4  | <b>24.5 (12.2 to 43.8)</b>            | <b>28 (13.4 to 51.1)</b>  | 40.1                  | 3766                 |
| Anus                   | Corpus Uteri, NOS                | <5  | <5   | 4.2 (0.9 to 12.4)                     | 14.3 (-0.6 to 50.4)                           | 8.4                  | <5   | <5   | 13.9 (0.4 to 77.5)                    | 5.8 (-0.3 to 34.4)        | 3.5                   | 1599                 |
| Anus                   | Gallbladder and Other Biliary    | <5  | <5   | 13 (0.3 to 72.6)                      | 2.5 (-0.1 to 14.6)                            | 3.4                  | 0    | -    | -                                     | -                         | -                     | 3766                 |
| Anus                   | Head and Neck                    | <5  | <5   | 2.5 (0.3 to 9)                        | 3.2 (-1.5 to 17)                              | 4.4                  | <5   | <5   | 6.4 (0.2 to 35.8)                     | 2.2 (-0.3 to 14.4)        | 3.2                   | 3766                 |
| Anus                   | Hodgkin Lymphoma                 | <5  | <5   | 9 (0.2 to 50)                         | 2.4 (-0.2 to 14.5)                            | 3.3                  | 0    | -    | -                                     | -                         | -                     | 3766                 |
| Anus                   | Kidney and Renal Pelvis          | <5  | <5   | 1.4 (0 to 7.8)                        | 0.8 (-1.8 to 12.9)                            | 1.0                  | 0    | -    | -                                     | -                         | -                     | 3766                 |
| Anus                   | Liver and Intrahepatic Bile Duct | <5  | <5   | 2.8 (0.1 to 15.7)                     | 1.7 (-0.9 to 13.9)                            | 2.4                  | <5   | <5   | 4.3 (0.1 to 23.7)                     | 2 (-0.6 to 14.2)          | 2.9                   | 3766                 |
| Anus                   | Lung and Bronchus                | 9   | 1.7  | <b>5.4 (2.5 to 10.2)</b>              | <b>19.5 (6.5 to 40.9)</b>                     | 26.9                 | 8    | 1.3  | <b>6.3 (2.7 to 12.5)</b>              | <b>17.9 (5.8 to 38.5)</b> | 25.6                  | 3766                 |
| Anus                   | Melanoma of the Skin             | <5  | <5   | 3.4 (0.9 to 8.7)                      | 7.5 (-0.2 to 24.1)                            | 10.4                 | 0    | -    | -                                     | -                         | -                     | 3766                 |
| Anus                   | Ovary                            | <5  | <5   | 3.4 (0.1 to 18.7)                     | 4.4 (-1.7 to 33)                              | 2.6                  | <5   | <5   | 14.6 (1.8 to 52.8)                    | 11.7 (0.7 to 44.3)        | 7.1                   | 1599                 |
| Anus                   | Pancreas                         | <5  | <5   | 2.6 (0.1 to 14.2)                     | 1.6 (-1 to 13.8)                              | 2.2                  | <5   | <5   | 6.6 (0.8 to 23.8)                     | 4.5 (-0.2 to 18.4)        | 6.4                   | 3766                 |
| Anus                   | Penis and Other Genital          | <5  | <5   | 102.7 (12.4 to 371)                   | 9.1 (1 to 33.3)                               | 7.3                  | 0    | -    | -                                     | -                         | -                     | 2166                 |
| Anus                   | Small Intestine                  | <5  | <5   | 9.6 (0.2 to 53.4)                     | 2.4 (-0.2 to 14.5)                            | 3.3                  | 0    | -    | -                                     | -                         | -                     | 3766                 |
| Anus                   | Stomach                          | 0   | -    | -                                     | -                                             | -                    | <5   | <5   | 9.2 (0.2 to 51.5)                     | 2.4 (-0.2 to 14.5)        | 3.4                   | 3766                 |
| Anus                   | Urinary Bladder                  | <5  | <5   | 3.5 (0.4 to 12.5)                     | 3.8 (-0.9 to 17.7)                            | 5.2                  | <5   | <5   | 28.1 (3.4 to 101.6)                   | 5.1 (0.5 to 19)           | 7.3                   | 3766                 |
| Anus                   | Vagina and Vulva                 | <5  | <5   | 41 (11.2 to 105)                      | 24.4 (6.2 to 63.4)                            | 14.3                 | 0    | -    | -                                     | -                         | -                     | 1599                 |
| Bones and Joints       | Acute Lymphocytic Leukemia       | <5  | <5   | 9.6 (1.2 to 34.8)                     | 0.6 (0 to 2.4)                                | 2.7                  | <5   | <5   | 18 (2.2 to 65.1)                      | 0.6 (0 to 2.4)            | 2.9                   | 29386                |
| Bones and Joints       | Acute Non-Lymphocytic Leukemia   | 7   | 0.8  | <b>8.5 (3.4 to 17.5)</b>              | <b>2.1 (0.7 to 4.6)</b>                       | 9.2                  | <5   | <5   | 8.1 (2.2 to 20.9)                     | 1.2 (0.2 to 3.3)          | 5.4                   | 29386                |
| Bones and Joints       | Anus                             | <5  | <5   | 4 (0.5 to 14.3)                       | 0.5 (-0.1 to 2.3)                             | 2.2                  | 0    | -    | -                                     | -                         | -                     | 29386                |
| Bones and Joints       | Brain and ONS                    | <5  | <5   | 0.6 (0 to 3.2)                        | -0.3 (-0.6 to 1.3)                            | -                    | 7    | 1.1  | <b>6.6 (2.7 to 13.7)</b>              | <b>2 (0.6 to 4.5)</b>     | 9.2                   | 29386                |
| Bones and Joints       | Breast (F)                       | 31  | 17.4 | <b>1.8 (1.2 to 2.5)</b>               | <b>10.7 (2.9 to 21)</b>                       | 20.3                 | 11   | 2.2  | <b>4.9 (2.5 to 8.8)</b>               | <b>6.9 (2.6 to 13.7)</b>  | 13.5                  | 12703                |
| Bones and Joints       | Chronic Myeloid Leukemia         | <5  | <5   | 2.3 (0.1 to 12.8)                     | 0.2 (-0.1 to 1.7)                             | 0.8                  | 0    | -    | -                                     | -                         | -                     | 29386                |
| Bones and Joints       | Colon and Rectum                 | 9   | 7.7  | 1.2 (0.5 to 2.2)                      | 0.4 (-1.2 to 3.2)                             | 1.9                  | <5   | <5   | 1.8 (0.5 to 4.6)                      | 0.6 (-0.4 to 2.7)         | 2.8                   | 29386                |
| Bones and Joints       | Corpus Uteri, NOS                | <5  | <5   | 1.2 (0.3 to 3.1)                      | 0.6 (-1.7 to 5.5)                             | 1.1                  | <5   | <5   | 3.1 (0.1 to 17.5)                     | 0.5 (-0.2 to 4.1)         | 1.1                   | 12703                |



| First primary cancer | Subsequent primary cancer        | Obs | Exp. | Standardized incidence ratio (95% CI) | Absolute excess incidence per 10,000 (95% CI) | AEI (%) <sup>a</sup> | Obs. | Exp. | Standardized mortality ratio (95% CI) | AEM (95% CI)            | AE M (%) <sup>b</sup> | Person Years at Risk |
|----------------------|----------------------------------|-----|------|---------------------------------------|-----------------------------------------------|----------------------|------|------|---------------------------------------|-------------------------|-----------------------|----------------------|
| Bones and Joints     | Esophagus                        | <5  | <5   | 2.3 (0.3 to 8.2)                      | 0.4 (-0.2 to 2.2)                             | 1.7                  | <5   | <5   | 1.3 (0 to 7.4)                        | 0.1 (-0.2 to 1.6)       | 0.4                   | 29386                |
| Bones and Joints     | Eye and Orbit                    | <5  | <5   | 4.7 (0.1 to 26.3)                     | 0.3 (-0.1 to 1.8)                             | 1.2                  | <5   | <5   | 64.8 (1.6 to 361.3)                   | 0.3 (0 to 1.9)          | 1.5                   | 29386                |
| Bones and Joints     | Gallbladder and Other Biliary    | <5  | <5   | 5.3 (0.6 to 19)                       | 0.6 (0 to 2.3)                                | 2.4                  | 0    | -    | -                                     | -                       | -                     | 29386                |
| Bones and Joints     | Head and Neck                    | 11  | 4.0  | <b>2.7 (1.4 to 4.9)</b>               | <b>2.4 (0.5 to 5.3)</b>                       | 10.4                 | <5   | <5   | 4 (0.8 to 11.7)                       | 0.8 (0 to 2.7)          | 3.5                   | 29386                |
| Bones and Joints     | Kidney and Renal Pelvis          | 5   | 3.5  | 1.4 (0.5 to 3.3)                      | 0.5 (-0.7 to 2.8)                             | 2.2                  | <5   | <5   | 3.2 (0.4 to 11.5)                     | 0.5 (-0.1 to 2.2)       | 2.1                   | 29386                |
| Bones and Joints     | Liver and Intrahepatic Bile Duct | <5  | <5   | 1.2 (0.1 to 4.4)                      | 0.1 (-0.5 to 1.9)                             | 0.5                  | <5   | <5   | 0.9 (0 to 5)                          | 0 (-0.4 to 1.5)         | -                     | 29386                |
| Bones and Joints     | Lung and Bronchus                | 14  | 8.1  | 1.7 (0.9 to 2.9)                      | 2 (-0.1 to 5.2)                               | 8.9                  | 10   | 6.1  | 1.6 (0.8 to 3)                        | 1.3 (-0.5 to 4.2)       | 5.9                   | 29386                |
| Bones and Joints     | Melanoma of the Skin             | 9   | 7.0  | 1.3 (0.6 to 2.4)                      | 0.7 (-1 to 3.4)                               | 3.0                  | <5   | <5   | 1.7 (0 to 9.7)                        | 0.1 (-0.2 to 1.7)       | 0.7                   | 29386                |
| Bones and Joints     | Myeloma                          | 0   | -    | -                                     | -                                             | -                    | <5   | <5   | 2.8 (0.1 to 15.6)                     | 0.2 (-0.1 to 1.8)       | 1.0                   | 29386                |
| Bones and Joints     | Non-Hodgkin Lymphoma             | <5  | <5   | 0.7 (0.2 to 1.9)                      | -0.5 (-1.5 to 1.7)                            | -                    | <5   | <5   | 2.2 (0.3 to 7.9)                      | 0.4 (-0.2 to 2.1)       | 1.7                   | 29386                |
| Bones and Joints     | Pancreas                         | <5  | <5   | 1.6 (0.3 to 4.6)                      | 0.4 (-0.4 to 2.3)                             | 1.6                  | <5   | <5   | 2.1 (0.4 to 6)                        | 0.5 (-0.3 to 2.5)       | 2.4                   | 29386                |
| Bones and Joints     | Prostate                         | 6   | 12.3 | 0.5 (0.2 to 1.1)                      | -3.8 (-6.1 to 0.4)                            | -                    | <5   | <5   | 2.1 (0.1 to 11.5)                     | 0.3 (-0.3 to 3)         | 0.8                   | 16683                |
| Bones and Joints     | Soft Tissue including Heart      | 13  | 0.8  | <b>15.9 (8.5 to 27.2)</b>             | <b>4.1 (2.1 to 7.3)</b>                       | 18.2                 | 27   | 0.3  | <b>92.1 (60.7 to 134)</b>             | <b>9.1 (6 to 13.3)</b>  | 41.2                  | 29386                |
| Bones and Joints     | Testis                           | 0   | -    | -                                     | -                                             | -                    | <5   | <5   | 31 (3.8 to 112.1)                     | 1.2 (0.1 to 4.3)        | 3.0                   | 16683                |
| Bones and Joints     | Thyroid                          | 7   | 4.4  | 1.6 (0.6 to 3.3)                      | 0.9 (-0.5 to 3.4)                             | 3.8                  | 0    | -    | -                                     | -                       | -                     | 29386                |
| Brain and ONS        | Acute Lymphocytic Leukemia       | <5  | <5   | 4 (0.5 to 14.5)                       | 0.2 (0 to 0.9)                                | 2.1                  | 0    | -    | -                                     | -                       | -                     | 73731                |
| Brain and ONS        | Acute Non-Lymphocytic Leukemia   | 8   | 1.9  | <b>4.2 (1.8 to 8.3)</b>               | <b>0.8 (0.2 to 1.9)</b>                       | 8.6                  | <5   | <5   | 2.7 (0.6 to 8)                        | 0.3 (-0.1 to 1)         | 3.3                   | 73731                |
| Brain and ONS        | Anus                             | <5  | <5   | 1.6 (0.2 to 5.9)                      | 0.1 (-0.1 to 0.8)                             | 1.1                  | 0    | -    | -                                     | -                       | -                     | 73731                |
| Brain and ONS        | Bones and Joints                 | 7   | 0.6  | <b>11.7 (4.7 to 24)</b>               | <b>0.9 (0.3 to 1.9)</b>                       | 9.0                  | 8    | 0.2  | <b>38.7 (16.7 to 76.2)</b>            | <b>1.1 (0.4 to 2.1)</b> | 13.4                  | 73731                |
| Brain and ONS        | Breast (M)                       | <5  | <5   | 4.3 (0.1 to 24)                       | 0.2 (-0.1 to 1.4)                             | 1.1                  | 0    | -    | -                                     | -                       | -                     | 39543                |
| Brain and ONS        | Cervix Uteri                     | 5   | 3.9  | 1.3 (0.4 to 3)                        | 0.3 (-0.7 to 2.3)                             | 1.5                  | <5   | <5   | 1 (0 to 5.4)                          | 0 (-0.3 to 1.3)         | -                     | 34188                |
| Brain and ONS        | Colon and Rectum                 | 18  | 17.9 | 1 (0.6 to 1.6)                        | 0 (-1 to 1.4)                                 | 0.1                  | 6    | 4.9  | 1.2 (0.4 to 2.7)                      | 0.1 (-0.4 to 1.1)       | 1.9                   | 73731                |
| Brain and ONS        | Corpus Uteri, NOS                | 9   | 8.1  | 1.1 (0.5 to 2.1)                      | 0.3 (-1.2 to 2.6)                             | 1.2                  | <5   | <5   | 1.3 (0 to 7.5)                        | 0.1 (-0.2 to 1.4)       | 0.4                   | 34188                |
| Brain and ONS        | Esophagus                        | <5  | <5   | 1.1 (0.1 to 4)                        | 0 (-0.2 to 0.7)                               | 0.3                  | <5   | <5   | 2.6 (0.7 to 6.6)                      | 0.3 (-0.1 to 1.2)       | 4.2                   | 73731                |
| Brain and ONS        | Gallbladder and Other Biliary    | <5  | <5   | 2.4 (0.3 to 8.7)                      | 0.2 (-0.1 to 0.9)                             | 1.6                  | <5   | <5   | 3.7 (0.1 to 20.5)                     | 0.1 (0 to 0.7)          | 1.3                   | 73731                |
| Brain and ONS        | Head and Neck                    | 21  | 9.2  | <b>2.3 (1.4 to 3.5)</b>               | <b>1.6 (0.5 to 3.1)</b>                       | 16.6                 | <5   | <5   | 2.5 (0.7 to 6.3)                      | 0.3 (-0.1 to 1.2)       | 4.1                   | 73731                |
| Brain and ONS        | Hodgkin Lymphoma                 | <5  | <5   | 1.2 (0.3 to 3.5)                      | 0.1 (-0.3 to 0.9)                             | 0.7                  | 0    | -    | -                                     | -                       | -                     | 73731                |
| Brain and ONS        | Kidney and Renal Pelvis          | 15  | 8.1  | <b>1.8 (1 to 3)</b>                   | <b>0.9 (0 to 2.3)</b>                         | 9.6                  | 5    | 1.3  | <b>3.7 (1.2 to 8.7)</b>               | <b>0.5 (0 to 1.4)</b>   | 6.3                   | 73731                |
| Brain and ONS        | Lung and Bronchus                | 23  | 16.9 | 1.4 (0.9 to 2)                        | 0.8 (-0.3 to 2.4)                             | 8.6                  | 21   | 12.7 | <b>1.7 (1 to 2.5)</b>                 | <b>1.1 (0 to 2.6)</b>   | 14.2                  | 73731                |
| Brain and ONS        | Melanoma of the Skin             | 16  | 17.9 | 0.9 (0.5 to 1.5)                      | -0.3 (-1.2 to 1.1)                            | -                    | <5   | <5   | 2.9 (0.8 to 7.3)                      | 0.4 (0 to 1.2)          | 4.5                   | 73731                |
| Brain and ONS        | Non-Hodgkin Lymphoma             | 12  | 12.4 | 1 (0.5 to 1.7)                        | -0.1 (-0.8 to 1.2)                            | -                    | <5   | <5   | 2 (0.6 to 5.2)                        | 0.3 (-0.1 to 1.1)       | 3.5                   | 73731                |
| Brain and ONS        | Ovary                            | <5  | <5   | 0.8 (0.2 to 2.2)                      | -0.3 (-1 to 1.4)                              | -                    | <5   | <5   | 1.3 (0.2 to 4.7)                      | 0.1 (-0.4 to 1.7)       | 0.8                   | 34188                |

| First primary cancer | Subsequent primary cancer        | Obs | Exp.  | Standardized incidence ratio (95% CI) | Absolute excess incidence per 10,000 (95% CI) | AEI (%) <sup>a</sup> | Obs. | Exp.  | Standardized mortality ratio (95% CI) | AEM (95% CI)            | AE M (%) <sup>b</sup> | Person Years at Risk |
|----------------------|----------------------------------|-----|-------|---------------------------------------|-----------------------------------------------|----------------------|------|-------|---------------------------------------|-------------------------|-----------------------|----------------------|
| Brain and ONS        | Small Intestine                  | <5  | <5    | 2.6 (0.5 to 7.6)                      | 0.3 (-0.1 to 1)                               | 2.6                  | 0    | -     | -                                     | -                       | -                     | 73731                |
| Brain and ONS        | Soft Tissue including Heart      | 9   | 2.0   | <b>4.6 (2.1 to 8.7)</b>               | <b>1 (0.3 to 2)</b>                           | 9.9                  | 15   | 0.7   | <b>21.6 (12.1 to 35.6)</b>            | <b>1.9 (1 to 3.3)</b>   | 24.6                  | 73731                |
| Brain and ONS        | Stomach                          | 5   | 2.7   | 1.9 (0.6 to 4.3)                      | 0.3 (-0.1 to 1.2)                             | 3.2                  | <5   | <5    | 2.4 (0.5 to 7)                        | 0.2 (-0.1 to 1)         | 3.0                   | 73731                |
| Brain and ONS        | Thyroid                          | 25  | 11.9  | <b>2.1 (1.4 to 3.1)</b>               | <b>1.8 (0.6 to 3.4)</b>                       | 18.4                 | <5   | <5    | 13.4 (1.6 to 48.3)                    | 0.3 (0 to 1)            | 3.2                   | 73731                |
| Brain and ONS        | Urinary Bladder                  | <5  | <5    | 0.5 (0.1 to 1.4)                      | -0.4 (-0.8 to 0.3)                            | -                    | <5   | <5    | 2.8 (0.3 to 9.9)                      | 0.2 (-0.1 to 0.9)       | 2.2                   | 73731                |
| Brain and ONS        | Vagina and Vulva                 | <5  | <5    | 1.6 (0.2 to 5.9)                      | 0.2 (-0.3 to 1.8)                             | 1.1                  | 0    | -     | -                                     | -                       | -                     | 34188                |
| Breast (F)           | Acute Lymphocytic Leukemia       | <5  | <5    | 0.4 (0 to 2.2)                        | 0 (-0.1 to 0.1)                               | -                    | <5   | <5    | 2.1 (0.4 to 6.3)                      | 0 (0 to 0.2)            | 0.5                   | 369017               |
| Breast (F)           | Acute Non-Lymphocytic Leukemia   | 37  | 14.8  | <b>2.5 (1.8 to 3.5)</b>               | <b>0.6 (0.3 to 1)</b>                         | 4.4                  | 31   | 9.4   | <b>3.3 (2.3 to 4.7)</b>               | <b>0.6 (0.3 to 0.9)</b> | 6.2                   | 369017               |
| Breast (F)           | Anus                             | 15  | 12.3  | 1.2 (0.7 to 2)                        | 0.1 (-0.1 to 0.3)                             | 0.5                  | <5   | <5    | 2.9 (0.8 to 7.5)                      | 0.1 (0 to 0.2)          | 0.8                   | 369017               |
| Breast (F)           | Bones and Joints                 | 5   | 3.1   | 1.6 (0.5 to 3.8)                      | 0.1 (0 to 0.2)                                | 0.4                  | 5    | 1.1   | <b>4.7 (1.5 to 11.1)</b>              | <b>0.1 (0 to 0.3)</b>   | 1.1                   | 369017               |
| Breast (F)           | Brain and ONS                    | 28  | 24.8  | 1.1 (0.8 to 1.6)                      | 0.1 (-0.2 to 0.4)                             | 0.6                  | 30   | 17.4  | <b>1.7 (1.2 to 2.5)</b>               | <b>0.3 (0.1 to 0.7)</b> | 3.6                   | 369017               |
| Breast (F)           | Chronic Myeloid Leukemia         | 9   | 6.4   | 1.4 (0.6 to 2.7)                      | 0.1 (-0.1 to 0.3)                             | 0.5                  | <5   | <5    | 0.8 (0 to 4.7)                        | 0 (0 to 0.1)            | -                     | 369017               |
| Breast (F)           | Corpus Uteri, NOS                | 209 | 170.6 | <b>1.2 (1.1 to 1.4)</b>               | <b>1 (0.3 to 1.9)</b>                         | 7.6                  | 29   | 19.0  | <b>1.5 (1 to 2.2)</b>                 | <b>0.3 (0 to 0.6)</b>   | 2.9                   | 369017               |
| Breast (F)           | Esophagus                        | 21  | 7.9   | <b>2.7 (1.7 to 4.1)</b>               | <b>0.4 (0.1 to 0.7)</b>                       | 2.6                  | 18   | 5.7   | <b>3.2 (1.9 to 5)</b>                 | <b>0.3 (0.1 to 0.6)</b> | 3.5                   | 369017               |
| Breast (F)           | Eye and Orbit                    | <5  | <5    | 0.8 (0.2 to 2.4)                      | 0 (-0.1 to 0.1)                               | -                    | <5   | <5    | 3.4 (0.1 to 18.9)                     | 0 (0 to 0.1)            | 0.2                   | 369017               |
| Breast (F)           | Gallbladder and Other Biliary    | 8   | 10.2  | 0.8 (0.3 to 1.6)                      | -0.1 (-0.2 to 0.2)                            | -                    | 5    | 4.0   | 1.2 (0.4 to 2.9)                      | 0 (-0.1 to 0.2)         | 0.3                   | 369017               |
| Breast (F)           | Head and Neck                    | 70  | 44.6  | <b>1.6 (1.2 to 2)</b>                 | <b>0.7 (0.3 to 1.2)</b>                       | 5.0                  | 7    | 8.1   | 0.9 (0.3 to 1.8)                      | 0 (-0.1 to 0.2)         | -                     | 369017               |
| Breast (F)           | Hodgkin Lymphoma                 | 5   | 7.9   | 0.6 (0.2 to 1.5)                      | -0.1 (-0.2 to 0.1)                            | -                    | <5   | <5    | 1.6 (0.2 to 5.9)                      | 0 (0 to 0.2)            | 0.2                   | 369017               |
| Breast (F)           | Kidney and Renal Pelvis          | 41  | 51.4  | 0.8 (0.6 to 1.1)                      | -0.3 (-0.6 to 0.1)                            | -                    | 11   | 9.1   | 1.2 (0.6 to 2.2)                      | 0.1 (-0.1 to 0.3)       | 0.5                   | 369017               |
| Breast (F)           | Liver and Intrahepatic Bile Duct | 19  | 17.9  | 1.1 (0.6 to 1.7)                      | 0 (-0.2 to 0.3)                               | 0.2                  | 19   | 13.8  | 1.4 (0.8 to 2.2)                      | 0.1 (-0.1 to 0.4)       | 1.5                   | 369017               |
| Breast (F)           | Lung and Bronchus                | 293 | 213.8 | <b>1.4 (1.2 to 1.5)</b>               | <b>2.1 (1.3 to 3.1)</b>                       | 15.7                 | 193  | 143.3 | <b>1.3 (1.2 to 1.6)</b>               | <b>1.3 (0.6 to 2.1)</b> | 14.3                  | 369017               |
| Breast (F)           | Melanoma of the Skin             | 102 | 108.7 | 0.9 (0.8 to 1.1)                      | -0.2 (-0.7 to 0.4)                            | -                    | 10   | 7.9   | 1.3 (0.6 to 2.3)                      | 0.1 (-0.1 to 0.3)       | 0.6                   | 369017               |
| Breast (F)           | Mesothelioma                     | 6   | 1.7   | <b>3.5 (1.3 to 7.6)</b>               | <b>0.1 (0 to 0.3)</b>                         | 0.8                  | 0    | -     | -                                     | -                       | -                     | 369017               |
| Breast (F)           | Non-Hodgkin Lymphoma             | 74  | 92.0  | 0.8 (0.6 to 1)                        | -0.5 (-0.9 to 0)                              | -                    | 21   | 15.9  | 1.3 (0.8 to 2)                        | 0.1 (-0.1 to 0.4)       | 1.5                   | 369017               |
| Breast (F)           | Ovary                            | 235 | 72.4  | <b>3.2 (2.8 to 3.7)</b>               | <b>4.4 (3.6 to 5.3)</b>                       | 32.2                 | 183  | 35.3  | <b>5.2 (4.5 to 6)</b>                 | <b>4 (3.3 to 4.8)</b>   | 42.4                  | 369017               |
| Breast (F)           | Pancreas                         | 65  | 42.0  | <b>1.5 (1.2 to 2)</b>                 | <b>0.6 (0.2 to 1.1)</b>                       | 4.5                  | 58   | 32.1  | <b>1.8 (1.4 to 2.3)</b>               | <b>0.7 (0.3 to 1.2)</b> | 7.4                   | 369017               |
| Breast (F)           | Soft Tissue including Heart      | 44  | 12.5  | <b>3.5 (2.6 to 4.7)</b>               | <b>0.9 (0.5 to 1.3)</b>                       | 6.2                  | 19   | 5.5   | <b>3.4 (2.1 to 5.4)</b>               | <b>0.4 (0.2 to 0.7)</b> | 3.9                   | 369017               |
| Breast (F)           | Stomach                          | 25  | 19.5  | 1.3 (0.8 to 1.9)                      | 0.1 (-0.1 to 0.5)                             | 1.1                  | 18   | 9.2   | <b>1.9 (1.2 to 3.1)</b>               | <b>0.2 (0 to 0.5)</b>   | 2.5                   | 369017               |
| Breast (F)           | Thyroid                          | 111 | 99.2  | 1.1 (0.9 to 1.3)                      | 0.3 (-0.2 to 0.9)                             | 2.3                  | <5   | <5    | 1.2 (0.1 to 4.4)                      | 0 (0 to 0.2)            | 0.1                   | 369017               |
| Breast (F)           | Urinary Bladder                  | 50  | 35.8  | <b>1.4 (1 to 1.8)</b>                 | <b>0.4 (0 to 0.8)</b>                         | 2.8                  | 9    | 5.3   | 1.7 (0.8 to 3.2)                      | 0.1 (0 to 0.3)          | 1.1                   | 369017               |
| Breast (F)           | Vagina and Vulva                 | 49  | 23.3  | <b>2.1 (1.6 to 2.8)</b>               | <b>0.7 (0.4 to 1.1)</b>                       | 5.1                  | 6    | 3.5   | 1.7 (0.6 to 3.7)                      | 0.1 (0 to 0.3)          | 0.7                   | 369017               |

| First primary cancer     | Subsequent primary cancer        | Obs | Exp.  | Standardized incidence ratio (95% CI) | Absolute excess incidence per 10,000 (95% CI) | AEI (%) <sup>a</sup> | Obs. | Exp. | Standardized mortality ratio (95% CI) | AEM (95% CI)            | AE M (%) <sup>b</sup> | Person Years at Risk |
|--------------------------|----------------------------------|-----|-------|---------------------------------------|-----------------------------------------------|----------------------|------|------|---------------------------------------|-------------------------|-----------------------|----------------------|
| Cervix Uteri             | Acute Lymphocytic Leukemia       | <5  | <5    | 0.8 (0 to 4.6)                        | 0 (-0.1 to 0.2)                               | -                    | <5   | <5   | 1.5 (0 to 8.3)                        | 0 (0 to 0.3)            | 0.2                   | 184623               |
| Cervix Uteri             | Acute Non-Lymphocytic Leukemia   | 10  | 6.9   | 1.4 (0.7 to 2.7)                      | 0.2 (-0.1 to 0.6)                             | 1.5                  | 6    | 4.3  | 1.4 (0.5 to 3)                        | 0.1 (-0.1 to 0.5)       | 1.1                   | 184623               |
| Cervix Uteri             | Anus                             | 12  | 5.7   | <b>2.1 (1.1 to 3.7)</b>               | <b>0.3 (0 to 0.8)</b>                         | 3.0                  | <5   | <5   | 1.6 (0 to 8.8)                        | 0 (0 to 0.3)            | 0.2                   | 184623               |
| Cervix Uteri             | Bones and Joints                 | <5  | <5    | 0.7 (0 to 3.7)                        | 0 (-0.1 to 0.2)                               | -                    | <5   | <5   | 4 (0.5 to 14.3)                       | 0.1 (0 to 0.4)          | 1.0                   | 184623               |
| Cervix Uteri             | Breast (F)                       | 280 | 390.8 | 0.7 (0.6 to 0.8)                      | -6 (-7.7 to -4.1)                             | -                    | 57   | 55.5 | 1 (0.8 to 1.3)                        | 0.1 (-0.7 to 1)         | 0.9                   | 184623               |
| Cervix Uteri             | Chronic Myeloid Leukemia         | 5   | 3.0   | 1.7 (0.5 to 3.9)                      | 0.1 (-0.1 to 0.5)                             | 1.0                  | <5   | <5   | 3.5 (0.4 to 12.5)                     | 0.1 (0 to 0.4)          | 0.9                   | 184623               |
| Cervix Uteri             | Colon and Rectum                 | 107 | 71.5  | <b>1.5 (1.2 to 1.8)</b>               | <b>1.9 (0.9 to 3.1)</b>                       | 17.1                 | 40   | 20.7 | <b>1.9 (1.4 to 2.6)</b>               | <b>1 (0.4 to 1.8)</b>   | 12.5                  | 184623               |
| Cervix Uteri             | Esophagus                        | 6   | 3.6   | 1.7 (0.6 to 3.6)                      | 0.1 (-0.1 to 0.5)                             | 1.1                  | <5   | <5   | 1.5 (0.4 to 3.9)                      | 0.1 (-0.1 to 0.4)       | 0.9                   | 184623               |
| Cervix Uteri             | Gallbladder and Other Biliary    | 5   | 4.6   | 1.1 (0.4 to 2.5)                      | 0 (-0.2 to 0.4)                               | 0.2                  | <5   | <5   | 2.2 (0.6 to 5.6)                      | 0.1 (0 to 0.5)          | 1.4                   | 184623               |
| Cervix Uteri             | Head and Neck                    | 28  | 20.6  | 1.4 (0.9 to 2)                        | 0.4 (-0.1 to 1.1)                             | 3.5                  | 8    | 3.7  | 2.1 (0.9 to 4.2)                      | 0.2 (0 to 0.7)          | 2.8                   | 184623               |
| Cervix Uteri             | Kidney and Renal Pelvis          | 28  | 23.7  | 1.2 (0.8 to 1.7)                      | 0.2 (-0.3 to 0.9)                             | 2.1                  | 5    | 4.1  | 1.2 (0.4 to 2.8)                      | 0 (-0.1 to 0.4)         | 0.6                   | 184623               |
| Cervix Uteri             | Liver and Intrahepatic Bile Duct | 12  | 8.3   | 1.4 (0.7 to 2.5)                      | 0.2 (-0.1 to 0.7)                             | 1.8                  | 11   | 6.3  | 1.7 (0.9 to 3.1)                      | 0.3 (0 to 0.7)          | 3.0                   | 184623               |
| Cervix Uteri             | Lung and Bronchus                | 135 | 97.0  | <b>1.4 (1.2 to 1.6)</b>               | <b>2.1 (0.9 to 3.4)</b>                       | 18.3                 | 132  | 64.9 | <b>2 (1.7 to 2.4)</b>                 | <b>3.6 (2.5 to 5)</b>   | 43.5                  | 184623               |
| Cervix Uteri             | Melanoma of the Skin             | 34  | 52.7  | 0.6 (0.4 to 0.9)                      | -1 (-1.6 to -0.3)                             | -                    | 5    | 3.7  | 1.3 (0.4 to 3.1)                      | 0.1 (-0.1 to 0.4)       | 0.8                   | 184623               |
| Cervix Uteri             | Mesothelioma                     | <5  | <5    | 2.5 (0.3 to 9.2)                      | 0.1 (0 to 0.3)                                | 0.6                  | 0    | -    | -                                     | -                       | -                     | 184623               |
| Cervix Uteri             | Myeloma                          | 8   | 11.0  | 0.7 (0.3 to 1.4)                      | -0.2 (-0.4 to 0.3)                            | -                    | <5   | <5   | 1 (0.3 to 2.6)                        | 0 (-0.2 to 0.3)         | 0.1                   | 184623               |
| Cervix Uteri             | Non-Hodgkin Lymphoma             | 44  | 42.3  | 1 (0.8 to 1.4)                        | 0.1 (-0.6 to 0.9)                             | 0.8                  | 10   | 7.3  | 1.4 (0.7 to 2.5)                      | 0.1 (-0.1 to 0.6)       | 1.8                   | 184623               |
| Cervix Uteri             | Pancreas                         | 24  | 19.2  | 1.2 (0.8 to 1.9)                      | 0.3 (-0.2 to 0.9)                             | 2.3                  | 20   | 14.7 | 1.4 (0.8 to 2.1)                      | 0.3 (-0.1 to 0.9)       | 3.4                   | 184623               |
| Cervix Uteri             | Small Intestine                  | 10  | 4.6   | <b>2.2 (1 to 4)</b>                   | <b>0.3 (0 to 0.7)</b>                         | 2.6                  | <5   | <5   | 3.5 (0.4 to 12.6)                     | 0.1 (0 to 0.4)          | 0.9                   | 184623               |
| Cervix Uteri             | Soft Tissue including Heart      | 10  | 5.9   | 1.7 (0.8 to 3.1)                      | 0.2 (-0.1 to 0.7)                             | 2.0                  | 13   | 2.6  | <b>5 (2.7 to 8.6)</b>                 | <b>0.6 (0.2 to 1.1)</b> | 6.7                   | 184623               |
| Cervix Uteri             | Stomach                          | 11  | 9.0   | 1.2 (0.6 to 2.2)                      | 0.1 (-0.2 to 0.6)                             | 0.9                  | 7    | 4.3  | 1.6 (0.7 to 3.4)                      | 0.1 (-0.1 to 0.5)       | 1.8                   | 184623               |
| Cervix Uteri             | Urinary Bladder                  | 46  | 16.2  | <b>2.8 (2.1 to 3.8)</b>               | <b>1.6 (0.9 to 2.4)</b>                       | 14.3                 | 19   | 2.4  | <b>7.9 (4.8 to 12.4)</b>              | <b>0.9 (0.5 to 1.5)</b> | 10.8                  | 184623               |
| Cervix Uteri             | Vagina and Vulva                 | 51  | 10.8  | <b>4.7 (3.5 to 6.2)</b>               | <b>2.2 (1.5 to 3)</b>                         | 19.3                 | 9    | 1.6  | <b>5.6 (2.5 to 10.5)</b>              | <b>0.4 (0.1 to 0.8)</b> | 4.8                   | 184623               |
| Chronic Myeloid Leukemia | Acute Lymphocytic Leukemia       | <5  | <5    | 51.3 (14 to 131.4)                    | 3.5 (0.9 to 9.1)                              | 10.4                 | 9    | 0.0  | <b>227 (103.8 to 431)</b>             | <b>8 (3.6 to 15.2)</b>  | 22.7                  | 11184                |
| Chronic Myeloid Leukemia | Brain and ONS                    | 0   | -     | -                                     | -                                             | -                    | <5   | <5   | 5 (0.6 to 18.2)                       | 1.4 (-0.1 to 6.1)       | 4.1                   | 11184                |
| Chronic Myeloid Leukemia | Breast (F)                       | <5  | <5    | 0.3 (0 to 1.2)                        | -9.4 (-13.3 to 2.3)                           | -                    | <5   | <5   | 2.6 (0.3 to 9.5)                      | 2.8 (-1.2 to 14.5)      | 3.1                   | 4471                 |
| Chronic Myeloid Leukemia | Breast (M)                       | <5  | <5    | 42.5 (5.1 to 153.4)                   | 2.9 (0.3 to 10.7)                             | 5.2                  | 0    | -    | -                                     | -                       | -                     | 6712                 |
| Chronic Myeloid Leukemia | Cervix Uteri                     | <5  | <5    | 5.8 (1.2 to 17)                       | 5.6 (0.2 to 18.5)                             | 6.6                  | <5   | <5   | 7.1 (0.2 to 39.5)                     | 1.9 (-0.3 to 12.1)      | 2.2                   | 4471                 |
| Chronic Myeloid Leukemia | Colon and Rectum                 | <5  | <5    | 0.3 (0 to 1.8)                        | -1.9 (-2.8 to 2.2)                            | -                    | <5   | <5   | 1.2 (0 to 6.6)                        | 0.1 (-0.7 to 4.2)       | 0.4                   | 11184                |
| Chronic Myeloid Leukemia | Esophagus                        | 0   | -     | -                                     | -                                             | -                    | <5   | <5   | 3.6 (0.1 to 20.1)                     | 0.6 (-0.2 to 4.7)       | 1.8                   | 11184                |
| Chronic Myeloid Leukemia | Head and Neck                    | 14  | 1.6   | <b>8.5 (4.6 to 14.2)</b>              | <b>11 (5.4 to 19.5)</b>                       | 32.8                 | <5   | <5   | 6.8 (0.8 to 24.5)                     | 1.5 (0 to 6.2)          | 4.3                   | 11184                |

| First primary cancer     | Subsequent primary cancer        | Obs | Exp. | Standardized incidence ratio (95% CI) | Absolute excess incidence per 10,000 (95% CI) | AEI (%) <sup>a</sup> | Obs. | Exp. | Standardized mortality ratio (95% CI) | AEM (95% CI)            | AE M (%) <sup>b</sup> | Person Years at Risk |
|--------------------------|----------------------------------|-----|------|---------------------------------------|-----------------------------------------------|----------------------|------|------|---------------------------------------|-------------------------|-----------------------|----------------------|
| Chronic Myeloid Leukemia | Hodgkin Lymphoma                 | <5  | <5   | 5.7 (0.7 to 20.4)                     | 1.5 (-0.1 to 6.1)                             | 4.4                  | <5   | <5   | 26.9 (0.7 to 149.9)                   | 0.9 (0 to 4.9)          | 2.4                   | 11184                |
| Chronic Myeloid Leukemia | Kidney and Renal Pelvis          | <5  | <5   | 0.7 (0 to 3.7)                        | -0.4 (-1.3 to 3.7)                            | -                    | <5   | <5   | 4.4 (0.1 to 24.6)                     | 0.7 (-0.2 to 4.8)       | 2.0                   | 11184                |
| Chronic Myeloid Leukemia | Liver and Intrahepatic Bile Duct | <5  | <5   | 1.4 (0 to 7.9)                        | 0.3 (-0.6 to 4.3)                             | 0.8                  | <5   | <5   | 2.2 (0.1 to 12.2)                     | 0.5 (-0.4 to 4.6)       | 1.4                   | 11184                |
| Chronic Myeloid Leukemia | Lung and Bronchus                | <5  | <5   | 0.4 (0 to 2.2)                        | -1.4 (-2.3 to 2.7)                            | -                    | <5   | <5   | 1 (0.1 to 3.7)                        | 0.1 (-1.5 to 4.7)       | 0.2                   | 11184                |
| Chronic Myeloid Leukemia | Melanoma of the Skin             | <5  | <5   | 1.1 (0.2 to 3.3)                      | 0.3 (-1.8 to 5.5)                             | 1.0                  | <5   | <5   | 4.9 (0.1 to 27.3)                     | 0.7 (-0.2 to 4.8)       | 2.0                   | 11184                |
| Chronic Myeloid Leukemia | Myeloma                          | <5  | <5   | 2.3 (0.1 to 12.8)                     | 0.5 (-0.4 to 4.6)                             | 1.5                  | 0    | -    | -                                     | -                       | -                     | 11184                |
| Chronic Myeloid Leukemia | Non-Hodgkin Lymphoma             | <5  | <5   | 0.5 (0 to 2.8)                        | -0.9 (-1.8 to 3.2)                            | -                    | <5   | <5   | 6.7 (0.8 to 24.1)                     | 1.5 (-0.1 to 6.2)       | 4.3                   | 11184                |
| Chronic Myeloid Leukemia | Pancreas                         | <5  | <5   | 1.5 (0 to 8.1)                        | 0.3 (-0.6 to 4.4)                             | 0.8                  | 0    | -    | -                                     | -                       | -                     | 11184                |
| Chronic Myeloid Leukemia | Prostate                         | 8   | 4.2  | 1.9 (0.8 to 3.7)                      | 5.7 (-1.1 to 17.2)                            | 10.1                 | <5   | <5   | 7.8 (0.2 to 43.4)                     | 1.3 (-0.2 to 8.1)       | 2.2                   | 6712                 |
| Chronic Myeloid Leukemia | Soft Tissue including Heart      | 0   | -    | -                                     | -                                             | -                    | <5   | <5   | 9 (0.2 to 50)                         | 0.8 (-0.1 to 4.9)       | 2.2                   | 11184                |
| Chronic Myeloid Leukemia | Stomach                          | 0   | -    | -                                     | -                                             | -                    | <5   | <5   | 4.5 (0.1 to 25)                       | 0.7 (-0.2 to 4.8)       | 2.0                   | 11184                |
| Chronic Myeloid Leukemia | Thyroid                          | <5  | <5   | 2.2 (0.6 to 5.6)                      | 1.9 (-0.7 to 7.5)                             | 5.8                  | 0    | -    | -                                     | -                       | -                     | 11184                |
| Chronic Myeloid Leukemia | Urinary Bladder                  | <5  | <5   | 3 (0.6 to 8.7)                        | 1.8 (-0.4 to 6.9)                             | 5.3                  | 0    | -    | -                                     | -                       | -                     | 11184                |
| Chronic Myeloid Leukemia | Vagina and Vulva                 | <5  | <5   | 6.3 (0.2 to 35)                       | 1.9 (-0.3 to 12.1)                            | 2.2                  | 0    | -    | -                                     | -                       | -                     | 4471                 |
| Colon and Rectum         | Acute Non-Lymphocytic Leukemia   | 0   | -    | -                                     | -                                             | -                    | <5   | <5   | 1.9 (0.5 to 4.9)                      | 0.2 (-0.1 to 1.1)       | 2.2                   | 77069                |
| Colon and Rectum         | Acute Non-Lymphocytic Leukemia   | <5  | <5   | 1.2 (0.3 to 3.2)                      | 0.1 (-0.3 to 0.9)                             | 0.5                  | 0    | -    | -                                     | -                       | -                     | 77069                |
| Colon and Rectum         | Bones and Joints                 | <5  | <5   | 4.3 (0.9 to 12.7)                     | 0.3 (0 to 1)                                  | 1.4                  | <5   | <5   | 3.7 (0.1 to 20.4)                     | 0.1 (0 to 0.7)          | 0.8                   | 77069                |
| Colon and Rectum         | Brain and ONS                    | 10  | 5.9  | 1.7 (0.8 to 3.1)                      | 0.5 (-0.1 to 1.6)                             | 2.4                  | 13   | 4.1  | <b>3.2 (1.7 to 5.4)</b>               | <b>1.2 (0.4 to 2.4)</b> | 10.4                  | 77069                |
| Colon and Rectum         | Breast (F)                       | 99  | 85.9 | 1.2 (0.9 to 1.4)                      | 3.3 (-1.4 to 8.7)                             | 7.7                  | 17   | 12.3 | 1.4 (0.8 to 2.2)                      | 1.2 (-0.6 to 3.7)       | 5.5                   | 39932                |
| Colon and Rectum         | Chronic Myeloid Leukemia         | <5  | <5   | 1.3 (0.2 to 4.7)                      | 0.1 (-0.2 to 0.7)                             | 0.3                  | <5   | <5   | 3.4 (0.1 to 19.2)                     | 0.1 (0 to 0.7)          | 0.8                   | 77069                |
| Colon and Rectum         | Corpus Uteri, NOS                | 62  | 17.1 | <b>3.6 (2.8 to 4.7)</b>               | <b>11.2 (7.6 to 15.6)</b>                     | 26.5                 | <5   | <5   | 1 (0.1 to 3.6)                        | 0 (-0.4 to 1.3)         | -                     | 39932                |
| Colon and Rectum         | Eye and Orbit                    | <5  | <5   | 3.8 (0.8 to 11)                       | 0.3 (0 to 1)                                  | 1.3                  | 0    | -    | -                                     | -                       | -                     | 77069                |
| Colon and Rectum         | Gallbladder and Other Biliary    | 12  | 2.0  | <b>6.1 (3.2 to 10.7)</b>              | <b>1.3 (0.5 to 2.5)</b>                       | 5.9                  | <5   | <5   | 5.9 (1.6 to 15)                       | 0.4 (0.1 to 1.2)        | 3.9                   | 77069                |
| Colon and Rectum         | Head and Neck                    | 11  | 16.7 | 0.7 (0.3 to 1.2)                      | -0.7 (-1.5 to 0.4)                            | -                    | <5   | <5   | 1.2 (0.3 to 3)                        | 0.1 (-0.3 to 0.9)       | 0.7                   | 77069                |
| Colon and Rectum         | Hodgkin Lymphoma                 | <5  | <5   | 0.5 (0 to 2.6)                        | -0.2 (-0.3 to 0.4)                            | -                    | <5   | <5   | 3.1 (0.1 to 17.3)                     | 0.1 (0 to 0.7)          | 0.8                   | 77069                |
| Colon and Rectum         | Kidney and Renal Pelvis          | 18  | 14.9 | 1.2 (0.7 to 1.9)                      | 0.4 (-0.5 to 1.8)                             | 1.8                  | <5   | <5   | 0.7 (0.1 to 2.5)                      | -0.1 (-0.3 to 0.6)      | -                     | 77069                |
| Colon and Rectum         | Liver and Intrahepatic Bile Duct | 13  | 7.8  | 1.7 (0.9 to 2.9)                      | 0.7 (-0.1 to 1.9)                             | 3.1                  | 13   | 5.2  | <b>2.5 (1.3 to 4.3)</b>               | <b>1 (0.2 to 2.2)</b>   | 9.1                   | 77069                |
| Colon and Rectum         | Lung and Bronchus                | 42  | 43.6 | 1 (0.7 to 1.3)                        | -0.2 (-1.7 to 1.7)                            | -                    | 35   | 32.2 | 1.1 (0.8 to 1.5)                      | 0.4 (-1 to 2.1)         | 3.3                   | 77069                |
| Colon and Rectum         | Myeloma                          | <5  | <5   | 0.7 (0.2 to 1.8)                      | -0.2 (-0.6 to 0.6)                            | -                    | 7    | 2.0  | <b>3.5 (1.4 to 7.2)</b>               | <b>0.7 (0.1 to 1.6)</b> | 5.9                   | 77069                |
| Colon and Rectum         | Ovary                            | 8   | 7.2  | 1.1 (0.5 to 2.2)                      | 0.2 (-0.9 to 2.1)                             | 0.5                  | 0    | -    | -                                     | -                       | -                     | 39932                |
| Colon and Rectum         | Pancreas                         | 20  | 9.5  | <b>2.1 (1.3 to 3.3)</b>               | <b>1.4 (0.4 to 2.8)</b>                       | 6.2                  | 18   | 7.4  | <b>2.4 (1.4 to 3.9)</b>               | <b>1.4 (0.4 to 2.7)</b> | 12.4                  | 77069                |
| Colon and Rectum         | Prostate                         | 53  | 54.6 | 1 (0.7 to 1.3)                        | -0.4 (-4 to 4)                                | -                    | <5   | <5   | 1.6 (0.4 to 4.1)                      | 0.4 (-0.4 to 2.1)       | 1.8                   | 37137                |

| First primary cancer | Subsequent primary cancer        | Obs | Exp. | Standardized incidence ratio (95% CI) | Absolute excess incidence per 10,000 (95% CI) | AEI (%) <sup>a</sup> | Obs. | Exp. | Standardized mortality ratio (95% CI) | AEM (95% CI)            | AE M (%) <sup>b</sup> | Person Years at Risk |
|----------------------|----------------------------------|-----|------|---------------------------------------|-----------------------------------------------|----------------------|------|------|---------------------------------------|-------------------------|-----------------------|----------------------|
| Colon and Rectum     | Small Intestine                  | 28  | 2.2  | <b>12.6 (8.3 to 18.1)</b>             | <b>3.3 (2.1 to 5)</b>                         | 15.2                 | 11   | 0.3  | <b>37.9 (18.9 to 67.9)</b>            | <b>1.4 (0.7 to 2.5)</b> | 12.5                  | 77069                |
| Colon and Rectum     | Soft Tissue including Heart      | <5  | <5   | 1.4 (0.4 to 3.6)                      | 0.2 (-0.2 to 1)                               | 0.7                  | <5   | <5   | 3.5 (1 to 9.1)                        | 0.4 (0 to 1.2)          | 3.4                   | 77069                |
| Colon and Rectum     | Stomach                          | 20  | 5.6  | <b>3.6 (2.2 to 5.5)</b>               | <b>1.9 (0.9 to 3.3)</b>                       | 8.5                  | 13   | 2.6  | <b>5 (2.7 to 8.6)</b>                 | <b>1.4 (0.6 to 2.5)</b> | 12.2                  | 77069                |
| Colon and Rectum     | Thyroid                          | 19  | 14.2 | 1.3 (0.8 to 2.1)                      | 0.6 (-0.4 to 2)                               | 2.8                  | 0    | -    | -                                     | -                       | -                     | 77069                |
| Colon and Rectum     | Urinary Bladder                  | 30  | 14.2 | <b>2.1 (1.4 to 3)</b>                 | <b>2.1 (0.8 to 3.7)</b>                       | 9.4                  | 6    | 1.9  | <b>3.2 (1.2 to 6.9)</b>               | <b>0.5 (0 to 1.4)</b>   | 4.8                   | 77069                |
| Colon and Rectum     | Vagina and Vulva                 | 6   | 2.4  | 2.5 (0.9 to 5.5)                      | 0.9 (0 to 2.7)                                | 2.1                  | <5   | <5   | 2.8 (0.1 to 15.4)                     | 0.2 (-0.1 to 1.3)       | 0.7                   | 39932                |
| Corpus Uteri, NOS    | Anus                             | <5  | <5   | 1.8 (0.4 to 5.3)                      | 0.3 (-0.2 to 1.3)                             | 1.2                  | 0    | -    | -                                     | -                       | -                     | 53474                |
| Corpus Uteri, NOS    | Bones and Joints                 | 0   | -    | -                                     | -                                             | -                    | <5   | <5   | 6.7 (0.2 to 37.4)                     | 0.2 (0 to 1)            | 1.4                   | 53474                |
| Corpus Uteri, NOS    | Brain and ONS                    | <5  | <5   | 0.9 (0.2 to 2.5)                      | -0.1 (-0.5 to 1)                              | -                    | <5   | <5   | 1.6 (0.4 to 4.2)                      | 0.3 (-0.3 to 1.5)       | 2.5                   | 53474                |
| Corpus Uteri, NOS    | Chronic Myeloid Leukemia         | <5  | <5   | 1.1 (0 to 6.2)                        | 0 (-0.2 to 0.9)                               | 0.1                  | 0    | -    | -                                     | -                       | -                     | 53474                |
| Corpus Uteri, NOS    | Colon and Rectum                 | 69  | 22.4 | <b>3.1 (2.4 to 3.9)</b>               | <b>8.7 (5.8 to 12.1)</b>                      | 42.9                 | 21   | 6.4  | <b>3.3 (2 to 5)</b>                   | <b>2.7 (1.2 to 4.8)</b> | 23.6                  | 53474                |
| Corpus Uteri, NOS    | Esophagus                        | <5  | <5   | 1.8 (0.2 to 6.6)                      | 0.2 (-0.2 to 1.1)                             | 0.8                  | <5   | <5   | 5.1 (1.4 to 12.9)                     | 0.6 (0.1 to 1.8)        | 5.2                   | 53474                |
| Corpus Uteri, NOS    | Gallbladder and Other Biliary    | <5  | <5   | 2.7 (0.7 to 6.9)                      | 0.5 (-0.1 to 1.6)                             | 2.3                  | <5   | <5   | 1.7 (0 to 9.4)                        | 0.1 (-0.1 to 0.9)       | 0.7                   | 53474                |
| Corpus Uteri, NOS    | Head and Neck                    | 7   | 6.4  | 1.1 (0.4 to 2.3)                      | 0.1 (-0.7 to 1.5)                             | 0.6                  | <5   | <5   | 1.7 (0.2 to 6.3)                      | 0.2 (-0.2 to 1.1)       | 1.4                   | 53474                |
| Corpus Uteri, NOS    | Kidney and Renal Pelvis          | 14  | 7.2  | <b>1.9 (1.1 to 3.3)</b>               | <b>1.3 (0.1 to 3)</b>                         | 6.2                  | <5   | <5   | 2.3 (0.5 to 6.7)                      | 0.3 (-0.1 to 1.4)       | 2.7                   | 53474                |
| Corpus Uteri, NOS    | Liver and Intrahepatic Bile Duct | 6   | 2.6  | 2.3 (0.8 to 5)                        | 0.6 (-0.1 to 2)                               | 3.1                  | <5   | <5   | 2 (0.5 to 5.1)                        | 0.4 (-0.2 to 1.5)       | 3.2                   | 53474                |
| Corpus Uteri, NOS    | Melanoma of the Skin             | 8   | 14.9 | 0.5 (0.2 to 1.1)                      | -1.3 (-2.1 to 0.2)                            | -                    | <5   | <5   | 1.8 (0.2 to 6.5)                      | 0.2 (-0.2 to 1.1)       | 1.4                   | 53474                |
| Corpus Uteri, NOS    | Mesothelioma                     | <5  | <5   | 8.1 (1 to 29.3)                       | 0.3 (0 to 1.3)                                | 1.6                  | 0    | -    | -                                     | -                       | -                     | 53474                |
| Corpus Uteri, NOS    | Non-Hodgkin Lymphoma             | 21  | 13.1 | 1.6 (1 to 2.4)                        | 1.5 (0 to 3.5)                                | 7.3                  | <5   | <5   | 1.7 (0.5 to 4.4)                      | 0.3 (-0.2 to 1.5)       | 2.7                   | 53474                |
| Corpus Uteri, NOS    | Pancreas                         | 8   | 6.0  | 1.3 (0.6 to 2.6)                      | 0.4 (-0.5 to 1.8)                             | 1.8                  | 5    | 4.6  | 1.1 (0.4 to 2.6)                      | 0.1 (-0.5 to 1.3)       | 0.7                   | 53474                |
| Corpus Uteri, NOS    | Small Intestine                  | 6   | 1.4  | <b>4.4 (1.6 to 9.6)</b>               | <b>0.9 (0.2 to 2.2)</b>                       | 4.3                  | <5   | <5   | 11.7 (1.4 to 42.1)                    | 0.3 (0 to 1.3)          | 3.0                   | 53474                |
| Corpus Uteri, NOS    | Soft Tissue including Heart      | 12  | 1.8  | <b>6.8 (3.5 to 11.8)</b>              | <b>1.9 (0.8 to 3.6)</b>                       | 9.4                  | 22   | 0.8  | <b>28.3 (17.7 to 42.8)</b>            | <b>4 (2.4 to 6.1)</b>   | 34.3                  | 53474                |
| Corpus Uteri, NOS    | Thyroid                          | 20  | 14.2 | 1.4 (0.9 to 2.2)                      | 1.1 (-0.4 to 3.1)                             | 5.4                  | <5   | <5   | 4.1 (0.1 to 23)                       | 0.1 (0 to 1)            | 1.2                   | 53474                |
| Corpus Uteri, NOS    | Urinary Bladder                  | 10  | 5.2  | 1.9 (0.9 to 3.6)                      | 0.9 (-0.1 to 2.5)                             | 4.5                  | 5    | 0.8  | <b>6.7 (2.2 to 15.5)</b>              | <b>0.8 (0.2 to 2)</b>   | 6.9                   | 53474                |
| Corpus Uteri, NOS    | Vagina and Vulva                 | 7   | 3.3  | 2.1 (0.9 to 4.4)                      | 0.7 (-0.1 to 2.1)                             | 3.4                  | <5   | <5   | 8.1 (2.2 to 20.6)                     | 0.7 (0.1 to 1.8)        | 5.7                   | 53474                |
| Eye and Orbit        | Bones and Joints                 | 0   | -    | -                                     | -                                             | -                    | <5   | <5   | 35.7 (0.9 to 198.7)                   | 1.2 (0 to 6.8)          | 1.6                   | 8143                 |
| Eye and Orbit        | Brain and ONS                    | <5  | <5   | 1.6 (0 to 8.7)                        | 0.4 (-0.8 to 6.1)                             | 2.0                  | <5   | <5   | 2.3 (0.1 to 12.9)                     | 0.7 (-0.5 to 6.3)       | 0.9                   | 8143                 |
| Eye and Orbit        | Breast (F)                       | 8   | 7.3  | 1.1 (0.5 to 2.2)                      | 1.7 (-9.5 to 20.9)                            | 3.9                  | 0    | -    | -                                     | -                       | -                     | 4044                 |
| Eye and Orbit        | Colon and Rectum                 | 6   | 3.2  | 1.9 (0.7 to 4.1)                      | 3.5 (-1.2 to 12.2)                            | 15.6                 | <5   | <5   | 2.1 (0.3 to 7.6)                      | 1.3 (-0.9 to 7.7)       | 1.7                   | 8143                 |
| Eye and Orbit        | Corpus Uteri, NOS                | <5  | <5   | 1.4 (0.2 to 5.1)                      | 1.5 (-2.9 to 14.4)                            | 3.2                  | <5   | <5   | 7.3 (0.2 to 40.8)                     | 2.1 (-0.3 to 13.4)      | 1.4                   | 4044                 |
| Eye and Orbit        | Hodgkin Lymphoma                 | <5  | <5   | 4 (0.1 to 22.2)                       | 0.9 (-0.3 to 6.5)                             | 4.1                  | 0    | -    | -                                     | -                       | -                     | 8143                 |
| Eye and Orbit        | Liver and Intrahepatic Bile Duct | <5  | <5   | 2.9 (0.4 to 10.5)                     | 1.6 (-0.5 to 8)                               | 7.2                  | <5   | <5   | 4.2 (0.5 to 15.3)                     | 1.9 (-0.3 to 8.3)       | 2.5                   | 8143                 |

| First primary cancer | Subsequent primary cancer        | Obs | Exp. | Standardized incidence ratio (95% CI) | Absolute excess incidence per 10,000 (95% CI) | AEI (%) <sup>a</sup> | Obs. | Exp. | Standardized mortality ratio (95% CI) | AEM (95% CI)               | AE M (%) <sup>b</sup> | Person Years at Risk |
|----------------------|----------------------------------|-----|------|---------------------------------------|-----------------------------------------------|----------------------|------|------|---------------------------------------|----------------------------|-----------------------|----------------------|
| Eye and Orbit        | Lung and Bronchus                | 6   | 3.9  | 1.6 (0.6 to 3.4)                      | 2.6 (-2 to 11.3)                              | 11.7                 | <5   | <5   | 1 (0.2 to 2.9)                        | 0 (-2.9 to 7.1)            | 0.0                   | 8143                 |
| Eye and Orbit        | Melanoma of the Skin             | 9   | 2.9  | <b>3.1 (1.4 to 6)</b>                 | <b>7.5 (1.5 to 17.5)</b>                      | 33.7                 | 53   | 0.3  | <b>210.4 (157.6 to 275.2)</b>         | <b>64.8 (48.4 to 84.8)</b> | 86.5                  | 8143                 |
| Eye and Orbit        | Myeloma                          | 0   | -    | -                                     | -                                             | -                    | <5   | <5   | 6 (0.2 to 33.3)                       | 1 (-0.2 to 6.6)            | 1.4                   | 8143                 |
| Eye and Orbit        | Ovary                            | <5  | <5   | 1.6 (0 to 8.9)                        | 0.9 (-1.5 to 12.2)                            | 2.1                  | <5   | <5   | 3.6 (0.1 to 20.1)                     | 1.8 (-0.6 to 13.1)         | 1.2                   | 4044                 |
| Eye and Orbit        | Soft Tissue including Heart      | 0   | -    | -                                     | -                                             | -                    | <5   | <5   | 9.3 (0.2 to 52)                       | 1.1 (-0.1 to 6.7)          | 1.5                   | 8143                 |
| Eye and Orbit        | Stomach                          | <5  | <5   | 2 (0.1 to 11.3)                       | 0.6 (-0.6 to 6.2)                             | 2.8                  | 0    | -    | -                                     | -                          | -                     | 8143                 |
| Eye and Orbit        | Thyroid                          | <5  | <5   | 2.7 (0.7 to 6.8)                      | 3.1 (-0.5 to 10.7)                            | 13.7                 | 0    | -    | -                                     | -                          | -                     | 8143                 |
| Eye and Orbit        | Urinary Bladder                  | 0   | -    | -                                     | -                                             | -                    | <5   | <5   | 5.3 (0.1 to 29.3)                     | 1 (-0.2 to 6.6)            | 1.3                   | 8143                 |
| Head and Neck        | Acute Lymphocytic Leukemia       | <5  | <5   | 1.9 (0 to 10.5)                       | 0.1 (-0.1 to 0.7)                             | 0.4                  | 0    | -    | -                                     | -                          | -                     | 70464                |
| Head and Neck        | Acute Non-Lymphocytic Leukemia   | 5   | 2.8  | 1.8 (0.6 to 4.1)                      | 0.3 (-0.2 to 1.3)                             | 1.9                  | <5   | <5   | 1.6 (0.3 to 4.8)                      | 0.2 (-0.2 to 1)            | 1.1                   | 70464                |
| Head and Neck        | Anus                             | <5  | <5   | 1.8 (0.4 to 5.3)                      | 0.2 (-0.1 to 1)                               | 1.2                  | 0    | -    | -                                     | -                          | -                     | 70464                |
| Head and Neck        | Bones and Joints                 | 9   | 0.6  | <b>14.4 (6.6 to 27.3)</b>             | <b>1.2 (0.5 to 2.3)</b>                       | 7.2                  | 6    | 0.2  | <b>24.3 (8.9 to 52.9)</b>             | <b>0.8 (0.3 to 1.8)</b>    | 5.6                   | 70464                |
| Head and Neck        | Brain and ONS                    | 8   | 5.3  | 1.5 (0.6 to 3)                        | 0.4 (-0.3 to 1.5)                             | 2.3                  | 16   | 3.7  | <b>4.4 (2.5 to 7.1)</b>               | <b>1.8 (0.8 to 3.2)</b>    | 12.1                  | 70464                |
| Head and Neck        | Breast (F)                       | 53  | 59.5 | 0.9 (0.7 to 1.2)                      | -2 (-6.2 to 3.1)                              | -                    | 10   | 8.1  | 1.2 (0.6 to 2.3)                      | 0.6 (-1 to 3.2)            | 1.8                   | 31723                |
| Head and Neck        | Cervix Uteri                     | <5  | <5   | 1.1 (0.3 to 2.7)                      | 0.1 (-0.9 to 2)                               | 0.2                  | <5   | <5   | 1.7 (0.2 to 6)                        | 0.3 (-0.3 to 1.9)          | 0.8                   | 31723                |
| Head and Neck        | Chronic Myeloid Leukemia         | <5  | <5   | 3 (0.8 to 7.6)                        | 0.4 (0 to 1.3)                                | 2.3                  | <5   | <5   | 3.8 (0.1 to 21)                       | 0.1 (0 to 0.8)             | 0.7                   | 70464                |
| Head and Neck        | Esophagus                        | 16  | 3.7  | <b>4.3 (2.5 to 7)</b>                 | <b>1.7 (0.8 to 3.2)</b>                       | 10.6                 | 14   | 3.2  | <b>4.4 (2.4 to 7.4)</b>               | <b>1.5 (0.6 to 2.9)</b>    | 10.6                  | 70464                |
| Head and Neck        | Eye and Orbit                    | <5  | <5   | 2.8 (0.3 to 10.1)                     | 0.2 (-0.1 to 0.9)                             | 1.1                  | <5   | <5   | 17.7 (0.4 to 98.6)                    | 0.1 (0 to 0.8)             | 0.9                   | 70464                |
| Head and Neck        | Gallbladder and Other Biliary    | <5  | <5   | 0.6 (0 to 3.5)                        | -0.1 (-0.2 to 0.6)                            | -                    | <5   | <5   | 1.9 (0 to 10.4)                       | 0.1 (-0.1 to 0.7)          | 0.5                   | 70464                |
| Head and Neck        | Kidney and Renal Pelvis          | 10  | 13.0 | 0.8 (0.4 to 1.4)                      | -0.4 (-1.2 to 0.8)                            | -                    | 5    | 2.6  | 1.9 (0.6 to 4.5)                      | 0.3 (-0.1 to 1.3)          | 2.3                   | 70464                |
| Head and Neck        | Liver and Intrahepatic Bile Duct | 12  | 7.1  | 1.7 (0.9 to 3)                        | 0.7 (-0.1 to 2)                               | 4.2                  | 8    | 4.7  | 1.7 (0.7 to 3.3)                      | 0.5 (-0.2 to 1.6)          | 3.2                   | 70464                |
| Head and Neck        | Lung and Bronchus                | 68  | 36.1 | <b>1.9 (1.5 to 2.4)</b>               | <b>4.5 (2.4 to 7.1)</b>                       | 27.6                 | 63   | 27.4 | <b>2.3 (1.8 to 2.9)</b>               | <b>5 (3 to 7.5)</b>        | 34.8                  | 70464                |
| Head and Neck        | Melanoma of the Skin             | 27  | 21.7 | 1.2 (0.8 to 1.8)                      | 0.7 (-0.6 to 2.5)                             | 4.6                  | 6    | 2.0  | <b>3 (1.1 to 6.5)</b>                 | <b>0.6 (0 to 1.6)</b>      | 3.9                   | 70464                |
| Head and Neck        | Myeloma                          | 5   | 4.5  | 1.1 (0.4 to 2.6)                      | 0.1 (-0.4 to 1)                               | 0.4                  | <5   | <5   | 0.6 (0 to 3.4)                        | -0.1 (-0.2 to 0.6)         | -                     | 70464                |
| Head and Neck        | Non-Hodgkin Lymphoma             | 32  | 19.2 | <b>1.7 (1.1 to 2.4)</b>               | <b>1.8 (0.4 to 3.7)</b>                       | 11.1                 | 8    | 3.7  | 2.2 (0.9 to 4.3)                      | 0.6 (0 to 1.7)             | 4.2                   | 70464                |
| Head and Neck        | Ovary                            | 5   | 5.1  | 1 (0.3 to 2.3)                        | 0 (-1.1 to 2.1)                               | -                    | <5   | <5   | 1.3 (0.3 to 3.8)                      | 0.2 (-0.5 to 2)            | 0.7                   | 31723                |
| Head and Neck        | Pancreas                         | 9   | 7.9  | 1.1 (0.5 to 2.2)                      | 0.2 (-0.5 to 1.3)                             | 0.9                  | 11   | 6.2  | 1.8 (0.9 to 3.2)                      | 0.7 (-0.1 to 1.9)          | 4.7                   | 70464                |
| Head and Neck        | Soft Tissue including Heart      | 8   | 2.5  | <b>3.2 (1.4 to 6.3)</b>               | <b>0.8 (0.1 to 1.9)</b>                       | 4.8                  | 9    | 1.0  | <b>9.4 (4.3 to 17.9)</b>              | <b>1.1 (0.4 to 2.3)</b>    | 7.9                   | 70464                |
| Head and Neck        | Thyroid                          | 21  | 11.8 | <b>1.8 (1.1 to 2.7)</b>               | <b>1.3 (0.2 to 2.9)</b>                       | 7.9                  | <5   | <5   | 3.6 (0.1 to 20.3)                     | 0.1 (0 to 0.8)             | 0.7                   | 70464                |
| Head and Neck        | Vagina and Vulva                 | <5  | <5   | 0.6 (0 to 3.4)                        | -0.2 (-0.5 to 1.2)                            | -                    | <5   | <5   | 4.3 (0.1 to 23.9)                     | 0.2 (-0.1 to 1.7)          | 0.7                   | 31723                |
| Hodgkin Lymphoma (F) | Acute Lymphocytic Leukemia       | <5  | <5   | 5.2 (1.1 to 15.2)                     | 0.2 (0 to 0.8)                                | 0.3                  | <5   | <5   | 3.3 (0.1 to 18.4)                     | 0.1 (0 to 0.5)             | 0.2                   | 102533               |

| First primary cancer | Subsequent primary cancer        | Obs | Exp.  | Standardized incidence ratio (95% CI) | Absolute excess incidence per 10,000 (95% CI) | AEI (%) <sup>a</sup> | Obs. | Exp. | Standardized mortality ratio (95% CI) | AEM (95% CI)             | AE M (%) <sup>b</sup> | Person Years at Risk |
|----------------------|----------------------------------|-----|-------|---------------------------------------|-----------------------------------------------|----------------------|------|------|---------------------------------------|--------------------------|-----------------------|----------------------|
| Hodgkin Lymphoma (F) | Acute Non-Lymphocytic Leukemia   | 22  | 2.5   | <b>8.6 (5.4 to 13.1)</b>              | <b>1.9 (1.1 to 3)</b>                         | 2.6                  | 25   | 1.4  | <b>17.8 (11.5 to 26.2)</b>            | <b>2.3 (1.4 to 3.5)</b>  | 7.2                   | 102533               |
| Hodgkin Lymphoma (F) | Anus                             | 13  | 2.1   | <b>6.3 (3.4 to 10.8)</b>              | <b>1.1 (0.5 to 2)</b>                         | 1.5                  | <5   | <5   | 9.3 (1.1 to 33.5)                     | 0.2 (0 to 0.7)           | 0.5                   | 102533               |
| Hodgkin Lymphoma (F) | Bones and Joints                 | 5   | 0.7   | <b>6.7 (2.2 to 15.6)</b>              | <b>0.4 (0.1 to 1.1)</b>                       | 0.6                  | <5   | <5   | 18.3 (5 to 46.9)                      | 0.4 (0.1 to 1)           | 1.2                   | 102533               |
| Hodgkin Lymphoma (F) | Brain and ONS                    | 9   | 5.1   | 1.8 (0.8 to 3.3)                      | 0.4 (-0.1 to 1.2)                             | 0.5                  | 9    | 2.9  | <b>3.1 (1.4 to 5.9)</b>               | <b>0.6 (0.1 to 1.4)</b>  | 1.9                   | 102533               |
| Hodgkin Lymphoma (F) | Breast (F)                       | 466 | 139.5 | <b>3.3 (3 to 3.7)</b>                 | <b>31.8 (27.8 to 36.2)</b>                    | 43.5                 | 102  | 17.4 | <b>5.9 (4.8 to 7.1)</b>               | <b>8.3 (6.4 to 10.4)</b> | 25.8                  | 102533               |
| Hodgkin Lymphoma (F) | Cervix Uteri                     | 18  | 11.7  | 1.5 (0.9 to 2.4)                      | 0.6 (-0.1 to 1.6)                             | 0.8                  | 9    | 3.1  | <b>2.9 (1.3 to 5.5)</b>               | <b>0.6 (0.1 to 1.4)</b>  | 1.8                   | 102533               |
| Hodgkin Lymphoma (F) | Chronic Myeloid Leukemia         | <5  | <5    | 1.7 (0.2 to 6.1)                      | 0.1 (-0.1 to 0.6)                             | 0.1                  | 0    | -    | -                                     | -                        | -                     | 102533               |
| Hodgkin Lymphoma (F) | Colon and Rectum                 | 48  | 22.4  | <b>2.1 (1.6 to 2.8)</b>               | <b>2.5 (1.3 to 4)</b>                         | 3.4                  | 11   | 5.9  | 1.9 (0.9 to 3.3)                      | 0.5 (0 to 1.3)           | 1.5                   | 102533               |
| Hodgkin Lymphoma (F) | Corpus Uteri, NOS                | 36  | 24.9  | <b>1.4 (1 to 2)</b>                   | <b>1.1 (0 to 2.4)</b>                         | 1.5                  | 8    | 2.3  | <b>3.5 (1.5 to 7)</b>                 | <b>0.6 (0.1 to 1.3)</b>  | 1.7                   | 102533               |
| Hodgkin Lymphoma (F) | Esophagus                        | 9   | 0.9   | <b>9.9 (4.5 to 18.8)</b>              | <b>0.8 (0.3 to 1.6)</b>                       | 1.1                  | 7    | 0.7  | <b>10.7 (4.3 to 22.1)</b>             | <b>0.6 (0.2 to 1.3)</b>  | 1.9                   | 102533               |
| Hodgkin Lymphoma (F) | Gallbladder and Other Biliary    | 5   | 1.2   | <b>4.2 (1.4 to 9.8)</b>               | <b>0.4 (0 to 1)</b>                           | 0.5                  | <5   | <5   | 4.4 (0.5 to 15.8)                     | 0.2 (0 to 0.7)           | 0.5                   | 102533               |
| Hodgkin Lymphoma (F) | Head and Neck                    | 37  | 6.8   | <b>5.4 (3.8 to 7.5)</b>               | <b>2.9 (1.9 to 4.3)</b>                       | 4.0                  | 0    | -    | -                                     | -                        | -                     | 102533               |
| Hodgkin Lymphoma (F) | Kaposi Sarcoma                   | <5  | <5    | 14.3 (0.4 to 79.7)                    | 0.1 (0 to 0.5)                                | 0.1                  | 0    | -    | -                                     | -                        | -                     | 102533               |
| Hodgkin Lymphoma (F) | Kidney and Renal Pelvis          | 12  | 7.9   | 1.5 (0.8 to 2.6)                      | 0.4 (-0.2 to 1.3)                             | 0.5                  | <5   | <5   | 0.9 (0 to 5)                          | 0 (-0.1 to 0.4)          | -                     | 102533               |
| Hodgkin Lymphoma (F) | Liver and Intrahepatic Bile Duct | 8   | 2.2   | <b>3.6 (1.6 to 7.2)</b>               | <b>0.6 (0.1 to 1.3)</b>                       | 0.8                  | <5   | <5   | 1.8 (0.4 to 5.3)                      | 0.1 (-0.1 to 0.7)        | 0.4                   | 102533               |
| Hodgkin Lymphoma (F) | Lung and Bronchus                | 103 | 23.9  | <b>4.3 (3.5 to 5.2)</b>               | <b>7.7 (5.9 to 9.9)</b>                       | 10.5                 | 82   | 16.1 | <b>5.1 (4 to 6.3)</b>                 | <b>6.4 (4.8 to 8.4)</b>  | 20.1                  | 102533               |
| Hodgkin Lymphoma (F) | Melanoma of the Skin             | 30  | 26.5  | 1.1 (0.8 to 1.6)                      | 0.3 (-0.6 to 1.6)                             | 0.5                  | <5   | <5   | 2.7 (0.7 to 7)                        | 0.2 (0 to 0.9)           | 0.8                   | 102533               |
| Hodgkin Lymphoma (F) | Mesothelioma                     | 8   | 0.3   | <b>30.8 (13.3 to 60.7)</b>            | <b>0.8 (0.3 to 1.5)</b>                       | 1.0                  | 0    | -    | -                                     | -                        | -                     | 102533               |
| Hodgkin Lymphoma (F) | Myeloma                          | 6   | 2.9   | 2.1 (0.8 to 4.6)                      | 0.3 (-0.1 to 1)                               | 0.4                  | <5   | <5   | 3.6 (0.7 to 10.6)                     | 0.2 (0 to 0.8)           | 0.7                   | 102533               |
| Hodgkin Lymphoma (F) | Non-Hodgkin Lymphoma             | 44  | 13.9  | <b>3.2 (2.3 to 4.2)</b>               | <b>2.9 (1.8 to 4.4)</b>                       | 4.0                  | 63   | 1.9  | <b>32.4 (24.9 to 41.4)</b>            | <b>6 (4.5 to 7.7)</b>    | 18.6                  | 102533               |
| Hodgkin Lymphoma (F) | Ovary                            | 15  | 11.8  | 1.3 (0.7 to 2.1)                      | 0.3 (-0.3 to 1.3)                             | 0.4                  | 7    | 4.7  | 1.5 (0.6 to 3.1)                      | 0.2 (-0.2 to 1)          | 0.7                   | 102533               |
| Hodgkin Lymphoma (F) | Pancreas                         | 18  | 5.0   | <b>3.6 (2.1 to 5.7)</b>               | <b>1.3 (0.6 to 2.3)</b>                       | 1.7                  | 19   | 3.6  | <b>5.2 (3.1 to 8.2)</b>               | <b>1.5 (0.8 to 2.5)</b>  | 4.7                   | 102533               |
| Hodgkin Lymphoma (F) | Small Intestine                  | <5  | <5    | 2 (0.4 to 5.9)                        | 0.1 (-0.1 to 0.7)                             | 0.2                  | <5   | <5   | 6.3 (0.2 to 35.1)                     | 0.1 (0 to 0.5)           | 0.3                   | 102533               |
| Hodgkin Lymphoma (F) | Soft Tissue including Heart      | 29  | 2.4   | <b>11.9 (8 to 17.1)</b>               | <b>2.6 (1.7 to 3.8)</b>                       | 3.5                  | 12   | 0.9  | <b>12.9 (6.7 to 22.6)</b>             | <b>1.1 (0.5 to 2)</b>    | 3.4                   | 102533               |
| Hodgkin Lymphoma (F) | Stomach                          | 12  | 2.7   | <b>4.4 (2.3 to 7.7)</b>               | <b>0.9 (0.3 to 1.8)</b>                       | 1.2                  | 12   | 1.3  | <b>9.4 (4.9 to 16.4)</b>              | <b>1 (0.5 to 1.9)</b>    | 3.3                   | 102533               |
| Hodgkin Lymphoma (F) | Thyroid                          | 103 | 26.7  | <b>3.9 (3.1 to 4.7)</b>               | <b>7.4 (5.6 to 9.6)</b>                       | 10.2                 | <5   | <5   | 5 (0.1 to 27.9)                       | 0.1 (0 to 0.5)           | 0.2                   | 102533               |
| Hodgkin Lymphoma (F) | Urinary Bladder                  | <5  | <5    | 0.7 (0.1 to 2)                        | -0.1 (-0.4 to 0.4)                            | -                    | <5   | <5   | 3.4 (0.4 to 12.4)                     | 0.1 (0 to 0.6)           | 0.4                   | 102533               |
| Hodgkin Lymphoma (F) | Vagina and Vulva                 | 12  | 3.8   | <b>3.2 (1.6 to 5.5)</b>               | <b>0.8 (0.2 to 1.7)</b>                       | 1.1                  | <5   | <5   | 4.1 (0.5 to 14.9)                     | 0.1 (0 to 0.7)           | 0.5                   | 102533               |
| Hodgkin Lymphoma (M) | Acute Lymphocytic Leukemia       | <5  | <5    | 2.4 (0.3 to 8.8)                      | 0.1 (-0.1 to 0.6)                             | 0.3                  | <5   | <5   | 6.6 (1.4 to 19.4)                     | 0.2 (0 to 0.8)           | 0.8                   | 104855               |
| Hodgkin Lymphoma (M) | Acute Non-Lymphocytic Leukemia   | 21  | 3.2   | <b>6.7 (4.1 to 10.2)</b>              | <b>1.7 (0.9 to 2.8)</b>                       | 4.1                  | 22   | 2.0  | <b>11.2 (7 to 17)</b>                 | <b>1.9 (1.1 to 3)</b>    | 6.0                   | 104855               |
| Hodgkin Lymphoma (M) | Anus                             | <5  | <5    | 2.3 (0.6 to 5.8)                      | 0.2 (-0.1 to 0.8)                             | 0.5                  | 0    | -    | -                                     | -                        | -                     | 104855               |

| First primary cancer | Subsequent primary cancer        | Obs | Exp. | Standardized incidence ratio (95% CI) | Absolute excess incidence per 10,000 (95% CI) | AEI (%) <sup>a</sup> | Obs. | Exp. | Standardized mortality ratio (95% CI) | AEM (95% CI)             | AE M (%) <sup>b</sup> | Person Years at Risk |
|----------------------|----------------------------------|-----|------|---------------------------------------|-----------------------------------------------|----------------------|------|------|---------------------------------------|--------------------------|-----------------------|----------------------|
| Hodgkin Lymphoma (M) | Bones and Joints                 | 7   | 1.0  | <b>7.3 (2.9 to 15)</b>                | <b>0.6 (0.2 to 1.3)</b>                       | 1.4                  | 6    | 0.4  | <b>15.9 (5.8 to 34.6)</b>             | <b>0.5 (0.2 to 1.2)</b>  | 1.7                   | 104855               |
| Hodgkin Lymphoma (M) | Brain and ONS                    | 12  | 7.6  | 1.6 (0.8 to 2.8)                      | 0.4 (-0.1 to 1.3)                             | 1.0                  | 15   | 4.8  | <b>3.1 (1.7 to 5.1)</b>               | <b>1 (0.3 to 1.9)</b>    | 3.0                   | 104855               |
| Hodgkin Lymphoma (M) | Breast (M)                       | <5  | <5   | 3.9 (0.8 to 11.5)                     | 0.2 (0 to 0.8)                                | 0.5                  | <5   | <5   | 13.4 (1.6 to 48.3)                    | 0.2 (0 to 0.7)           | 0.6                   | 104855               |
| Hodgkin Lymphoma (M) | Chronic Myeloid Leukemia         | <5  | <5   | 1.1 (0.1 to 3.9)                      | 0 (-0.2 to 0.5)                               | 0.0                  | <5   | <5   | 5.8 (0.7 to 21)                       | 0.2 (0 to 0.7)           | 0.5                   | 104855               |
| Hodgkin Lymphoma (M) | Colon and Rectum                 | 51  | 31.8 | <b>1.6 (1.2 to 2.1)</b>               | <b>1.8 (0.6 to 3.4)</b>                       | 4.4                  | 32   | 9.4  | <b>3.4 (2.3 to 4.8)</b>               | <b>2.2 (1.2 to 3.4)</b>  | 6.7                   | 104855               |
| Hodgkin Lymphoma (M) | Esophagus                        | 16  | 5.0  | <b>3.2 (1.8 to 5.2)</b>               | <b>1 (0.4 to 2)</b>                           | 2.5                  | 16   | 4.4  | <b>3.6 (2.1 to 5.8)</b>               | <b>1.1 (0.4 to 2.1)</b>  | 3.4                   | 104855               |
| Hodgkin Lymphoma (M) | Gallbladder and Other Biliary    | <5  | <5   | 2.2 (0.5 to 6.5)                      | 0.2 (-0.1 to 0.7)                             | 0.4                  | <5   | <5   | 7.9 (1.6 to 22.9)                     | 0.3 (0 to 0.8)           | 0.8                   | 104855               |
| Hodgkin Lymphoma (M) | Head and Neck                    | 41  | 21.5 | <b>1.9 (1.4 to 2.6)</b>               | <b>1.9 (0.8 to 3.3)</b>                       | 4.5                  | 8    | 4.2  | 1.9 (0.8 to 3.8)                      | 0.4 (-0.1 to 1.1)        | 1.1                   | 104855               |
| Hodgkin Lymphoma (M) | Kidney and Renal Pelvis          | 31  | 17.1 | <b>1.8 (1.2 to 2.6)</b>               | <b>1.3 (0.4 to 2.6)</b>                       | 3.2                  | 6    | 3.2  | 1.9 (0.7 to 4.1)                      | 0.3 (-0.1 to 0.9)        | 0.8                   | 104855               |
| Hodgkin Lymphoma (M) | Liver and Intrahepatic Bile Duct | 16  | 8.9  | <b>1.8 (1 to 2.9)</b>                 | <b>0.7 (0 to 1.6)</b>                         | 1.6                  | 15   | 5.8  | <b>2.6 (1.4 to 4.3)</b>               | <b>0.9 (0.2 to 1.8)</b>  | 2.7                   | 104855               |
| Hodgkin Lymphoma (M) | Lung and Bronchus                | 145 | 30.9 | <b>4.7 (4 to 5.5)</b>                 | <b>10.9 (8.7 to 13.3)</b>                     | 26.1                 | 127  | 25.8 | <b>4.9 (4.1 to 5.9)</b>               | <b>9.7 (7.6 to 11.9)</b> | 30.1                  | 104855               |
| Hodgkin Lymphoma (M) | Melanoma of the Skin             | 39  | 28.0 | 1.4 (1 to 1.9)                        | 1.1 (0 to 2.4)                                | 2.5                  | 7    | 2.8  | 2.5 (1 to 5.1)                        | 0.4 (0 to 1.1)           | 1.2                   | 104855               |
| Hodgkin Lymphoma (M) | Mesothelioma                     | <5  | <5   | 5.7 (1.2 to 16.6)                     | 0.2 (0 to 0.8)                                | 0.6                  | 0    | -    | -                                     | -                        | -                     | 104855               |
| Hodgkin Lymphoma (M) | Myeloma                          | 6   | 4.7  | 1.3 (0.5 to 2.8)                      | 0.1 (-0.2 to 0.8)                             | 0.3                  | <5   | <5   | 2.6 (0.7 to 6.7)                      | 0.2 (0 to 0.8)           | 0.7                   | 104855               |
| Hodgkin Lymphoma (M) | Non-Hodgkin Lymphoma             | 102 | 24.0 | <b>4.2 (3.5 to 5.2)</b>               | <b>7.4 (5.6 to 9.5)</b>                       | 17.9                 | 82   | 4.3  | <b>19.2 (15.3 to 23.9)</b>            | <b>7.4 (5.8 to 9.3)</b>  | 23.1                  | 104855               |
| Hodgkin Lymphoma (M) | Pancreas                         | 28  | 8.0  | <b>3.5 (2.3 to 5.1)</b>               | <b>1.9 (1 to 3.1)</b>                         | 4.6                  | 26   | 6.3  | <b>4.1 (2.7 to 6)</b>                 | <b>1.9 (1 to 3)</b>      | 5.9                   | 104855               |
| Hodgkin Lymphoma (M) | Penis and Other Genital          | <5  | <5   | 2.9 (0.4 to 10.5)                     | 0.1 (0 to 0.6)                                | 0.3                  | 0    | -    | -                                     | -                        | -                     | 104855               |
| Hodgkin Lymphoma (M) | Prostate                         | 80  | 80.6 | 1 (0.8 to 1.2)                        | -0.1 (-1.6 to 1.8)                            | -                    | 5    | 2.9  | 1.7 (0.6 to 4)                        | 0.2 (-0.1 to 0.8)        | 0.6                   | 104855               |
| Hodgkin Lymphoma (M) | Small Intestine                  | <5  | <5   | 1.4 (0.3 to 4.2)                      | 0.1 (-0.1 to 0.6)                             | 0.2                  | <5   | <5   | 3.9 (0.1 to 21.6)                     | 0.1 (0 to 0.5)           | 0.2                   | 104855               |
| Hodgkin Lymphoma (M) | Soft Tissue including Heart      | 22  | 3.3  | <b>6.6 (4.2 to 10)</b>                | <b>1.8 (1 to 2.9)</b>                         | 4.3                  | 12   | 1.1  | <b>10.5 (5.4 to 18.4)</b>             | <b>1 (0.5 to 1.9)</b>    | 3.2                   | 104855               |
| Hodgkin Lymphoma (M) | Stomach                          | 33  | 5.5  | <b>6 (4.2 to 8.5)</b>                 | <b>2.6 (1.6 to 3.9)</b>                       | 6.3                  | 17   | 2.5  | <b>6.8 (4 to 10.9)</b>                | <b>1.4 (0.7 to 2.4)</b>  | 4.3                   | 104855               |
| Hodgkin Lymphoma (M) | Thyroid                          | 29  | 8.3  | <b>3.5 (2.3 to 5)</b>                 | <b>2 (1.1 to 3.2)</b>                         | 4.7                  | 0    | -    | -                                     | -                        | -                     | 104855               |
| Hodgkin Lymphoma (M) | Urinary Bladder                  | 21  | 16.3 | 1.3 (0.8 to 2)                        | 0.4 (-0.3 to 1.5)                             | 1.1                  | 5    | 1.9  | 2.7 (0.9 to 6.2)                      | 0.3 (0 to 0.9)           | 0.9                   | 104855               |
| Kaposi Sarcoma (M)   | Acute Non-Lymphocytic Leukemia   | <5  | <5   | 2 (0.1 to 11.2)                       | 0.3 (-0.3 to 3.3)                             | 0.5                  | <5   | <5   | 3.5 (0.1 to 19.4)                     | 0.5 (-0.2 to 3.5)        | 2.2                   | 15256                |
| Kaposi Sarcoma (M)   | Anus                             | 32  | 0.4  | <b>81.2 (55.5 to 114.6)</b>           | <b>20.7 (14.1 to 29.4)</b>                    | 30.0                 | 5    | 0.0  | <b>128.4 (41.7 to 299.7)</b>          | <b>3.3 (1 to 7.6)</b>    | 15.6                  | 15256                |
| Kaposi Sarcoma (M)   | Bones and Joints                 | <5  | <5   | 6.9 (0.2 to 38.6)                     | 0.6 (-0.1 to 3.6)                             | 0.8                  | <5   | <5   | 35.6 (4.3 to 128.7)                   | 1.3 (0.1 to 4.7)         | 6.1                   | 15256                |
| Kaposi Sarcoma (M)   | Brain and ONS                    | <5  | <5   | 1.7 (0.2 to 6.3)                      | 0.6 (-0.6 to 4)                               | 0.8                  | <5   | <5   | 1.3 (0 to 7.3)                        | 0.2 (-0.5 to 3.2)        | 0.8                   | 15256                |
| Kaposi Sarcoma (M)   | Breast (M)                       | <5  | <5   | 7.2 (0.2 to 40.1)                     | 0.6 (-0.1 to 3.6)                             | 0.8                  | 0    | -    | -                                     | -                        | -                     | 15256                |
| Kaposi Sarcoma (M)   | Colon and Rectum                 | 7   | 5.8  | 1.2 (0.5 to 2.5)                      | 0.8 (-1.9 to 5.7)                             | 1.2                  | <5   | <5   | 2.4 (0.7 to 6.2)                      | 1.5 (-0.4 to 5.6)        | 7.4                   | 15256                |
| Kaposi Sarcoma (M)   | Esophagus                        | <5  | <5   | 3.7 (0.8 to 10.8)                     | 1.4 (-0.1 to 5.2)                             | 2.1                  | <5   | <5   | 1.4 (0 to 7.6)                        | 0.2 (-0.5 to 3.2)        | 0.9                   | 15256                |
| Kaposi Sarcoma (M)   | Gallbladder and Other Biliary    | <5  | <5   | 8.7 (1.1 to 31.3)                     | 1.2 (0 to 4.6)                                | 1.7                  | <5   | <5   | 32.3 (3.9 to 116.8)                   | 1.3 (0.1 to 4.7)         | 6.1                   | 15256                |
| Kaposi Sarcoma (M)   | Head and Neck                    | 13  | 3.8  | <b>3.4 (1.8 to 5.8)</b>               | <b>6 (2 to 12.1)</b>                          | 8.7                  | <5   | <5   | 2.8 (0.3 to 10)                       | 0.8 (-0.3 to 4.3)        | 4.0                   | 15256                |



| First primary cancer    | Subsequent primary cancer        | Obs | Exp. | Standardized incidence ratio (95% CI) | Absolute excess incidence per 10,000 (95% CI) | AEI (%) <sup>a</sup> | Obs. | Exp. | Standardized mortality ratio (95% CI) | AEM (95% CI)            | AE M (%) <sup>b</sup> | Person Years at Risk |
|-------------------------|----------------------------------|-----|------|---------------------------------------|-----------------------------------------------|----------------------|------|------|---------------------------------------|-------------------------|-----------------------|----------------------|
| Kaposi Sarcoma (M)      | Hodgkin Lymphoma                 | 5   | 0.6  | <b>9 (2.9 to 21)</b>                  | <b>2.9 (0.7 to 7.3)</b>                       | 4.2                  | <5   | <5   | 29.9 (3.6 to 108.1)                   | 1.3 (0.1 to 4.7)        | 6.1                   | 15256                |
| Kaposi Sarcoma (M)      | Kidney and Renal Pelvis          | <5  | <5   | 1.3 (0.3 to 3.2)                      | 0.5 (-1.4 to 4.6)                             | 0.8                  | 0    | -    | -                                     | -                       | -                     | 15256                |
| Kaposi Sarcoma (M)      | Liver and Intrahepatic Bile Duct | 9   | 1.7  | <b>5.3 (2.4 to 10.2)</b>              | <b>4.8 (1.6 to 10.1)</b>                      | 7.0                  | 8    | 1.1  | <b>7.3 (3.2 to 14.4)</b>              | <b>4.5 (1.5 to 9.6)</b> | 21.8                  | 15256                |
| Kaposi Sarcoma (M)      | Melanoma of the Skin             | 5   | 4.2  | 1.2 (0.4 to 2.8)                      | 0.5 (-1.7 to 4.9)                             | 0.7                  | <5   | <5   | 2.4 (0.1 to 13.6)                     | 0.4 (-0.3 to 3.4)       | 1.9                   | 15256                |
| Kaposi Sarcoma (M)      | Non-Hodgkin Lymphoma             | 39  | 3.9  | <b>10 (7.1 to 13.6)</b>               | <b>23 (15.6 to 32.4)</b>                      | 33.3                 | <5   | <5   | 6.3 (1.7 to 16.2)                     | 2.2 (0.3 to 6.3)        | 10.6                  | 15256                |
| Kaposi Sarcoma (M)      | Pancreas                         | <5  | <5   | 0.7 (0 to 4.1)                        | -0.2 (-0.9 to 2.8)                            | -                    | <5   | <5   | 2.8 (0.6 to 8.2)                      | 1.3 (-0.3 to 5)         | 6.1                   | 15256                |
| Kaposi Sarcoma (M)      | Penis and Other Genital          | <5  | <5   | 33.4 (9.1 to 85.5)                    | 2.5 (0.6 to 6.6)                              | 3.7                  | 0    | -    | -                                     | -                       | -                     | 15256                |
| Kaposi Sarcoma (M)      | Stomach                          | <5  | <5   | 2.1 (0.3 to 7.6)                      | 0.7 (-0.5 to 4.1)                             | 1.0                  | <5   | <5   | 6.8 (1.4 to 20)                       | 1.7 (0.1 to 5.5)        | 8.1                   | 15256                |
| Kaposi Sarcoma (M)      | Urinary Bladder                  | <5  | <5   | 1.7 (0.5 to 4.2)                      | 1 (-0.9 to 5.1)                               | 1.5                  | <5   | <5   | 3.5 (0.1 to 19.5)                     | 0.5 (-0.2 to 3.5)       | 2.3                   | 15256                |
| Kidney and Renal Pelvis | Acute Lymphocytic Leukemia       | <5  | <5   | 4 (0.1 to 22.1)                       | 0.2 (-0.1 to 1.6)                             | 1.3                  | <5   | <5   | 7.3 (0.2 to 40.7)                     | 0.3 (0 to 1.6)          | 2.4                   | 33780                |
| Kidney and Renal Pelvis | Acute Non-Lymphocytic Leukemia   | 0   | -    | -                                     | -                                             | -                    | <5   | <5   | 2.5 (0.3 to 9)                        | 0.4 (-0.2 to 1.9)       | 3.4                   | 33780                |
| Kidney and Renal Pelvis | Anus                             | <5  | <5   | 2.3 (0.3 to 8.5)                      | 0.3 (-0.2 to 1.9)                             | 2.0                  | 0    | -    | -                                     | -                       | -                     | 33780                |
| Kidney and Renal Pelvis | Bones and Joints                 | 0   | -    | -                                     | -                                             | -                    | <5   | <5   | 8.7 (0.2 to 48.2)                     | 0.3 (0 to 1.6)          | 2.5                   | 33780                |
| Kidney and Renal Pelvis | Brain and ONS                    | <5  | <5   | 1.2 (0.2 to 3.5)                      | 0.1 (-0.6 to 1.9)                             | 0.9                  | <5   | <5   | 1.2 (0.1 to 4.2)                      | 0.1 (-0.4 to 1.6)       | 0.8                   | 33780                |
| Kidney and Renal Pelvis | Breast (F)                       | 31  | 29.3 | 1.1 (0.7 to 1.5)                      | 1.1 (-5.3 to 9.6)                             | 3.0                  | 6    | 3.9  | 1.5 (0.6 to 3.3)                      | 1.4 (-1.1 to 6)         | 5.9                   | 15334                |
| Kidney and Renal Pelvis | Colon and Rectum                 | 17  | 13.9 | 1.2 (0.7 to 2)                        | 0.9 (-1.2 to 3.9)                             | 5.4                  | 8    | 4.1  | 2 (0.9 to 3.9)                        | 1.2 (-0.2 to 3.5)       | 11.1                  | 33780                |
| Kidney and Renal Pelvis | Corpus Uteri, NOS                | 5   | 5.5  | 0.9 (0.3 to 2.1)                      | -0.3 (-2.5 to 4)                              | -                    | <5   | <5   | 1.7 (0 to 9.5)                        | 0.3 (-0.4 to 3.3)       | 1.2                   | 15334                |
| Kidney and Renal Pelvis | Eye and Orbit                    | <5  | <5   | 2.9 (0.1 to 16.3)                     | 0.2 (-0.1 to 1.5)                             | 1.1                  | 0    | -    | -                                     | -                       | -                     | 33780                |
| Kidney and Renal Pelvis | Hodgkin Lymphoma                 | <5  | <5   | 3 (0.6 to 8.7)                        | 0.6 (-0.1 to 2.3)                             | 3.5                  | <5   | <5   | 7.3 (0.2 to 40.4)                     | 0.3 (0 to 1.6)          | 2.4                   | 33780                |
| Kidney and Renal Pelvis | Kaposi Sarcoma                   | <5  | <5   | 1.4 (0 to 7.8)                        | 0.1 (-0.2 to 1.4)                             | 0.5                  | 0    | -    | -                                     | -                       | -                     | 33780                |
| Kidney and Renal Pelvis | Liver and Intrahepatic Bile Duct | <5  | <5   | 1.3 (0.3 to 3.3)                      | 0.3 (-0.6 to 2.1)                             | 1.5                  | <5   | <5   | 1.4 (0.3 to 4.2)                      | 0.3 (-0.4 to 2)         | 2.6                   | 33780                |
| Kidney and Renal Pelvis | Lung and Bronchus                | 21  | 15.6 | 1.3 (0.8 to 2.1)                      | 1.6 (-0.8 to 4.9)                             | 9.3                  | 19   | 11.9 | 1.6 (1 to 2.5)                        | 2.1 (-0.1 to 5.3)       | 20.1                  | 33780                |
| Kidney and Renal Pelvis | Melanoma of the Skin             | 13  | 10.5 | 1.2 (0.7 to 2.1)                      | 0.7 (-1.1 to 3.5)                             | 4.3                  | 5    | 0.9  | <b>5.4 (1.7 to 12.6)</b>              | <b>1.2 (0.2 to 3.2)</b> | 11.5                  | 33780                |
| Kidney and Renal Pelvis | Myeloma                          | <5  | <5   | 1.9 (0.5 to 4.8)                      | 0.6 (-0.3 to 2.4)                             | 3.3                  | <5   | <5   | 2.8 (0.3 to 10.3)                     | 0.4 (-0.1 to 1.9)       | 3.7                   | 33780                |
| Kidney and Renal Pelvis | Non-Hodgkin Lymphoma             | 14  | 8.9  | 1.6 (0.9 to 2.6)                      | 1.5 (-0.4 to 4.3)                             | 8.9                  | <5   | <5   | 2.5 (0.7 to 6.4)                      | 0.7 (-0.2 to 2.6)       | 6.8                   | 33780                |
| Kidney and Renal Pelvis | Pancreas                         | 11  | 3.6  | <b>3.1 (1.5 to 5.5)</b>               | <b>2.2 (0.6 to 4.8)</b>                       | 12.9                 | 7    | 2.8  | <b>2.5 (1 to 5.2)</b>                 | <b>1.3 (0 to 3.4)</b>   | 12.0                  | 33780                |
| Kidney and Renal Pelvis | Prostate                         | 21  | 24.4 | 0.9 (0.5 to 1.3)                      | -1.8 (-6.2 to 4.2)                            | -                    | <5   | <5   | 1 (0 to 5.7)                          | 0 (-0.5 to 2.5)         | 0.1                   | 18445                |
| Kidney and Renal Pelvis | Small Intestine                  | <5  | <5   | 1.1 (0 to 6.2)                        | 0 (-0.3 to 1.4)                               | 0.2                  | 0    | -    | -                                     | -                       | -                     | 33780                |
| Kidney and Renal Pelvis | Soft Tissue including Heart      | <5  | <5   | 2.5 (0.5 to 7.3)                      | 0.5 (-0.2 to 2.2)                             | 3.1                  | <5   | <5   | 4.4 (0.5 to 15.9)                     | 0.5 (-0.1 to 2)         | 4.4                   | 33780                |
| Kidney and Renal Pelvis | Stomach                          | <5  | <5   | 1.4 (0.3 to 4)                        | 0.2 (-0.5 to 1.9)                             | 1.4                  | 0    | -    | -                                     | -                       | -                     | 33780                |
| Kidney and Renal Pelvis | Thyroid                          | 16  | 6.1  | <b>2.6 (1.5 to 4.3)</b>               | <b>2.9 (0.9 to 5.9)</b>                       | 17.3                 | 0    | -    | -                                     | -                       | -                     | 33780                |
| Kidney and Renal Pelvis | Urinary Bladder                  | 11  | 5.8  | 1.9 (0.9 to 3.4)                      | 1.5 (-0.1 to 4.1)                             | 9.1                  | <5   | <5   | 5.5 (1.5 to 14)                       | 1 (0.1 to 2.8)          | 9.2                   | 33780                |

| First primary cancer    | Subsequent primary cancer        | Obs | Exp.                         | Standardized incidence ratio (95% CI) | Absolute excess incidence per 10,000 (95% CI) | AEI (%) <sup>a</sup> | Obs. | Exp. | Standardized mortality ratio (95% CI) | AEM (95% CI)            | AE M (%) <sup>b</sup> | Person Years at Risk |
|-------------------------|----------------------------------|-----|------------------------------|---------------------------------------|-----------------------------------------------|----------------------|------|------|---------------------------------------|-------------------------|-----------------------|----------------------|
| Kidney and Renal Pelvis | Vagina and Vulva                 | <5  | <5                           | 2.5 (0.3 to 9.1)                      | 0.8 (-0.4 to 4.2)                             | 2.1                  | 0    | -    | -                                     | -                       | -                     | 15334                |
| Lung and Bronchus       | Acute Lymphocytic Leukemia       | <5  | <5                           | 6.7 (0.2 to 37.1)                     | 0.4 (-0.1 to 2.6)                             | 2.9                  | 0    | -    | -                                     | -                       | -                     | 20821                |
| Lung and Bronchus       | Acute Non-Lymphocytic Leukemia   | <5  | <5                           | 1.2 (0 to 6.9)                        | 0.1 (-0.4 to 2.3)                             | 0.7                  | <5   | <5   | 1.9 (0 to 10.7)                       | 0.2 (-0.2 to 2.4)       | 1.5                   | 20821                |
| Lung and Bronchus       | Bones and Joints                 | 0   | -                            | -                                     | -                                             | -                    | <5   | <5   | 14.1 (0.4 to 78.3)                    | 0.4 (0 to 2.6)          | 2.9                   | 20821                |
| Lung and Bronchus       | Brain and ONS                    | <5  | <5                           | 1.9 (0.4 to 5.7)                      | 0.7 (-0.4 to 3.5)                             | 5.0                  | <5   | <5   | 2.8 (0.6 to 8.3)                      | 0.9 (-0.2 to 3.7)       | 6.0                   | 20821                |
| Lung and Bronchus       | Breast (F)                       | 25  | 22.8                         | 1.1 (0.7 to 1.6)                      | 1.9 (-5.8 to 12.2)                            | 7.4                  | <5   | <5   | 1.3 (0.3 to 3.3)                      | 0.7 (-1.8 to 6.2)       | 2.7                   | 11520                |
| Lung and Bronchus       | Cervix Uteri                     | <5  | <5                           | 1.4 (0.2 to 5.2)                      | 0.5 (-1 to 5.1)                               | 2.1                  | <5   | <5   | 4.4 (0.5 to 15.9)                     | 1.3 (-0.2 to 5.9)       | 4.8                   | 11520                |
| Lung and Bronchus       | Chronic Myeloid Leukemia         | <5  | <5                           | 2.6 (0.1 to 14.3)                     | 0.3 (-0.2 to 2.5)                             | 2.1                  | <5   | <5   | 25.5 (3.1 to 92.2)                    | 0.9 (0.1 to 3.4)        | 6.0                   | 20821                |
| Lung and Bronchus       | Colon and Rectum                 | 15  | 8.5                          | 1.8 (1 to 2.9)                        | 3.1 (-0.1 to 7.8)                             | 22.0                 | 6    | 2.6  | 2.3 (0.9 to 5.1)                      | 1.6 (-0.2 to 5)         | 10.6                  | 20821                |
| Lung and Bronchus       | Corpus Uteri, NOS                | <5  | <5                           | 0.4 (0.1 to 1.6)                      | -2.2 (-3.7 to 2.4)                            | -                    | <5   | <5   | 4.2 (0.5 to 15.2)                     | 1.3 (-0.2 to 5.9)       | 4.7                   | 11520                |
| Lung and Bronchus       | Esophagus                        | <5  | <5                           | 3.1 (0.6 to 8.9)                      | 1 (-0.2 to 3.7)                               | 6.8                  | <5   | <5   | 2.4 (0.3 to 8.6)                      | 0.6 (-0.3 to 3.1)       | 3.6                   | 20821                |
| Lung and Bronchus       | Gallbladder and Other Biliary    | 0   | -                            | -                                     | -                                             | -                    | <5   | <5   | 6.2 (0.2 to 34.5)                     | 0.4 (-0.1 to 2.6)       | 2.6                   | 20821                |
| Lung and Bronchus       | Head and Neck                    | 9   | 4.2                          | 2.1 (1 to 4)                          | 2.3 (-0.1 to 6.2)                             | 16.2                 | <5   | <5   | 2.3 (0.3 to 8.1)                      | 0.5 (-0.3 to 3)         | 3.4                   | 20821                |
| Lung and Bronchus       | Kaposi Sarcoma                   | <5  | <5                           | 2.3 (0.1 to 12.6)                     | 0.3 (-0.2 to 2.5)                             | 1.9                  | 0    | -    | -                                     | -                       | -                     | 20821                |
| Lung and Bronchus       | Kidney and Renal Pelvis          | <5  | <5                           | 0.3 (0 to 1.5)                        | -1.3 (-1.7 to 0.9)                            | -                    | <5   | <5   | 1.4 (0 to 7.8)                        | 0.1 (-0.3 to 2.3)       | 0.9                   | 20821                |
| Lung and Bronchus       | Liver and Intrahepatic Bile Duct | <5  | <5                           | 1.1 (0.1 to 4)                        | 0.1 (-0.7 to 2.6)                             | 0.7                  | <5   | <5   | 1.6 (0.2 to 5.9)                      | 0.4 (-0.5 to 2.9)       | 2.4                   | 20821                |
| Lung and Bronchus       | Melanoma of the Skin             | 8   | 6.4                          | 1.2 (0.5 to 2.5)                      | 0.8 (-1.4 to 4.5)                             | 5.3                  | <5   | <5   | 1.8 (0 to 9.9)                        | 0.2 (-0.3 to 2.4)       | 1.4                   | 20821                |
| Lung and Bronchus       | Myeloma                          | <5  | <5                           | 0.8 (0 to 4.2)                        | -0.2 (-0.6 to 2)                              | -                    | <5   | <5   | 2.1 (0.1 to 11.7)                     | 0.3 (-0.2 to 2.4)       | 1.6                   | 20821                |
| Lung and Bronchus       | Ovary                            | <5  | <5                           | 0.5 (0 to 2.9)                        | -0.8 (-1.7 to 3.1)                            | -                    | <5   | <5   | 2.2 (0.3 to 7.9)                      | 0.9 (-0.6 to 5.5)       | 3.4                   | 11520                |
| Lung and Bronchus       | Pancreas                         | <5  | <5                           | 1.3 (0.3 to 3.8)                      | 0.3 (-0.8 to 3.1)                             | 2.4                  | 6    | 1.8  | <b>3.4 (1.2 to 7.3)</b>               | <b>2 (0.2 to 5.4)</b>   | 13.0                  | 20821                |
| Lung and Bronchus       | Small Intestine                  | <5  | <5                           | 3.7 (0.4 to 13.2)                     | 0.7 (-0.1 to 3.2)                             | 4.9                  | 0    | -    | -                                     | -                       | -                     | 20821                |
| Lung and Bronchus       | Soft Tissue including Heart      | <5  | <5                           | 2.8 (0.3 to 10.1)                     | 0.6 (-0.2 to 3.1)                             | 4.4                  | <5   | <5   | 10.5 (2.2 to 30.7)                    | 1.3 (0.2 to 4.1)        | 8.4                   | 20821                |
| Lung and Bronchus       | Stomach                          | 0   | -                            | -                                     | -                                             | -                    | <5   | <5   | 3.1 (0.4 to 11.3)                     | 0.7 (-0.2 to 3.2)       | 4.2                   | 20821                |
| Lung and Bronchus       | Testis                           | <5  | <5                           | 1.5 (0 to 8.6)                        | 0.4 (-0.7 to 5.3)                             | 1.2                  | 0    | -    | -                                     | -                       | -                     | 9300                 |
| Lung and Bronchus       | Thyroid                          | 6   | 3.9                          | 1.6 (0.6 to 3.4)                      | 1 (-0.8 to 4.4)                               | 7.3                  | <5   | <5   | 12.8 (0.3 to 71.3)                    | 0.4 (0 to 2.6)          | 2.9                   | 20821                |
| Lung and Bronchus       | Urinary Bladder                  | <5  | <5                           | 1.2 (0.3 to 3)                        | 0.3 (-1.1 to 3.3)                             | 2.0                  | <5   | <5   | 2.3 (0.1 to 12.6)                     | 0.3 (-0.2 to 2.5)       | 1.7                   | 20821                |
| Lung and Bronchus       | Vagina and Vulva                 | <5  | <5                           | 3.2 (0.4 to 11.4)                     | 1.2 (-0.3 to 5.7)                             | 4.7                  | 0    | -    | -                                     | -                       | -                     | 11520                |
| Melanoma of the Skin    | Acute Non-Lymphocytic Leukemia   | 16  | 14.6                         | 1.1 (0.6 to 1.8)                      | 0 (-0.1 to 0.3)                               | 1.4                  | 12   | 9.3  | 1.3 (0.7 to 2.3)                      | 0.1 (-0.1 to 0.3)       | 5.9                   | 375984               |
| Melanoma of the Skin    | Anus                             | 11  | 10.2                         | 1.1 (0.5 to 1.9)                      | 0 (-0.1 to 0.3)                               | 0.8                  | 0    | -    | -                                     | -                       | -                     | 375984               |
| Melanoma of the Skin    | Bones and Joints                 | 6   | 3.4                          | 1.7 (0.6 to 3.8)                      | 0.1 (0 to 0.3)                                | 2.6                  | 5    | 1.2  | <b>4.1 (1.3 to 9.5)</b>               | <b>0.1 (0 to 0.3)</b>   | 8.2                   | 375984               |
| Melanoma of the Skin    | Brain and ONS                    | 28  | 29.2                         | 1 (0.6 to 1.4)                        | 0 (-0.3 to 0.3)                               | -                    | 35   | 19.8 | <b>1.8 (1.2 to 2.5)</b>               | <b>0.4 (0.1 to 0.8)</b> | 32.8                  | 375984               |
| Melanoma of the Skin    | Breast (F)                       | 368 | <sup>448.</sup> <sub>2</sub> | 0.8 (0.7 to 0.9)                      | -3.5 (-5 to -1.8)                             | -                    | 60   | 57.3 | 1 (0.8 to 1.3)                        | 0.1 (-0.5 to 0.9)       | 5.7                   | 231730               |

| First primary cancer | Subsequent primary cancer        | Obs | Exp.  | Standardized incidence ratio (95% CI) | Absolute excess incidence per 10,000 (95% CI) | AEI (%) <sup>a</sup> | Obs. | Exp. | Standardized mortality ratio (95% CI) | AEM (95% CI)          | AE M (%) <sup>b</sup> | Person Years at Risk |
|----------------------|----------------------------------|-----|-------|---------------------------------------|-----------------------------------------------|----------------------|------|------|---------------------------------------|-----------------------|-----------------------|----------------------|
| Melanoma of the Skin | Breast (M)                       | <5  | <5    | 2.4 (0.6 to 6.1)                      | 0.2 (0 to 0.6)                                | 2.3                  | <5   | <5   | 3 (0.1 to 16.8)                       | 0 (0 to 0.4)          | 1.4                   | 144254               |
| Melanoma of the Skin | Corpus Uteri, NOS                | 65  | 88.9  | 0.7 (0.6 to 0.9)                      | -1 (-1.7 to -0.3)                             | -                    | 9    | 8.7  | 1 (0.5 to 2)                          | 0 (-0.2 to 0.4)       | 0.6                   | 231730               |
| Melanoma of the Skin | Eye and Orbit                    | 8   | 4.2   | 1.9 (0.8 to 3.7)                      | 0.1 (0 to 0.3)                                | 3.8                  | 0    | -    | -                                     | -                     | -                     | 375984               |
| Melanoma of the Skin | Head and Neck                    | 63  | 69.1  | 0.9 (0.7 to 1.2)                      | -0.2 (-0.5 to 0.3)                            | -                    | 13   | 12.9 | 1 (0.5 to 1.7)                        | 0 (-0.2 to 0.2)       | 0.2                   | 375984               |
| Melanoma of the Skin | Hodgkin Lymphoma                 | 15  | 11.0  | 1.4 (0.8 to 2.3)                      | 0.1 (-0.1 to 0.4)                             | 4.1                  | <5   | <5   | 1.3 (0.2 to 4.7)                      | 0 (0 to 0.2)          | 1.0                   | 375984               |
| Melanoma of the Skin | Mesothelioma                     | 6   | 2.5   | 2.4 (0.9 to 5.3)                      | 0.1 (0 to 0.3)                                | 3.6                  | 0    | -    | -                                     | -                     | -                     | 375984               |
| Melanoma of the Skin | Myeloma                          | 13  | 20.4  | 0.6 (0.3 to 1.1)                      | -0.2 (-0.4 to 0)                              | -                    | 11   | 7.1  | 1.5 (0.8 to 2.8)                      | 0.1 (0 to 0.3)        | 8.4                   | 375984               |
| Melanoma of the Skin | Non-Hodgkin Lymphoma             | 105 | 99.0  | 1.1 (0.9 to 1.3)                      | 0.2 (-0.3 to 0.7)                             | 6.1                  | 17   | 17.3 | 1 (0.6 to 1.6)                        | 0 (-0.2 to 0.3)       | -                     | 375984               |
| Melanoma of the Skin | Prostate                         | 224 | 205.1 | 1.1 (1 to 1.2)                        | 1.3 (-0.7 to 3.5)                             | 19.0                 | 12   | 8.3  | 1.4 (0.7 to 2.5)                      | 0.3 (-0.1 to 0.9)     | 8.0                   | 144254               |
| Melanoma of the Skin | Small Intestine                  | 15  | 9.2   | 1.6 (0.9 to 2.7)                      | 0.2 (0 to 0.4)                                | 5.8                  | 5    | 1.1  | <b>4.5 (1.4 to 10.4)</b>              | <b>0.1 (0 to 0.3)</b> | 8.4                   | 375984               |
| Melanoma of the Skin | Soft Tissue including Heart      | 27  | 12.7  | <b>2.1 (1.4 to 3.1)</b>               | <b>0.4 (0.1 to 0.7)</b>                       | 14.4                 | 12   | 4.9  | <b>2.4 (1.3 to 4.2)</b>               | <b>0.2 (0 to 0.4)</b> | 15.3                  | 375984               |
| Melanoma of the Skin | Stomach                          | 10  | 20.3  | 0.5 (0.2 to 0.9)                      | -0.3 (-0.4 to -0.1)                           | -                    | 10   | 9.1  | 1.1 (0.5 to 2)                        | 0 (-0.1 to 0.2)       | 1.9                   | 375984               |
| Melanoma of the Skin | Testis                           | 5   | 11.8  | 0.4 (0.1 to 1)                        | -0.5 (-0.7 to 0)                              | -                    | <5   | <5   | 1.9 (0 to 10.4)                       | 0 (0 to 0.3)          | 1.0                   | 144254               |
| Melanoma of the Skin | Thyroid                          | 119 | 80.9  | <b>1.5 (1.2 to 1.8)</b>               | <b>1 (0.5 to 1.6)</b>                         | 38.4                 | 0    | -    | -                                     | -                     | -                     | 375984               |
| Myeloma              | Acute Non-Lymphocytic Leukemia   | <5  | <5    | 15.2 (1.8 to 55)                      | 4.9 (0.3 to 18.5)                             | 9.9                  | <5   | <5   | 25 (3 to 90.3)                        | 5 (0.4 to 18.6)       | 21.2                  | 3832                 |
| Myeloma              | Anus                             | <5  | <5    | 10.4 (0.3 to 58.2)                    | 2.4 (-0.2 to 14.3)                            | 4.8                  | 0    | -    | -                                     | -                     | -                     | 3832                 |
| Myeloma              | Brain and ONS                    | <5  | <5    | 3.9 (0.1 to 21.7)                     | 1.9 (-0.6 to 13.9)                            | 3.9                  | 0    | -    | -                                     | -                     | -                     | 3832                 |
| Myeloma              | Breast (F)                       | <5  | <5    | 1.1 (0.2 to 3.1)                      | 1 (-14.4 to 38.3)                             | 0.8                  | 0    | -    | -                                     | -                     | -                     | 1548                 |
| Myeloma              | Colon and Rectum                 | <5  | <5    | 1.3 (0.2 to 4.8)                      | 1.3 (-3.3 to 14.9)                            | 2.6                  | 0    | -    | -                                     | -                     | -                     | 3832                 |
| Myeloma              | Corpus Uteri, NOS                | <5  | <5    | 2 (0.1 to 11.2)                       | 3.2 (-3.1 to 32.8)                            | 2.6                  | 0    | -    | -                                     | -                     | -                     | 1548                 |
| Myeloma              | Head and Neck                    | <5  | <5    | 5 (1.4 to 12.9)                       | 8.4 (0.8 to 24.7)                             | 16.9                 | <5   | <5   | 6 (0.2 to 33.6)                       | 2.2 (-0.4 to 14.1)    | 9.2                   | 3832                 |
| Myeloma              | Kaposi Sarcoma                   | <5  | <5    | 11.1 (0.3 to 61.8)                    | 2.4 (-0.2 to 14.3)                            | 4.8                  | 0    | -    | -                                     | -                     | -                     | 3832                 |
| Myeloma              | Kidney and Renal Pelvis          | <5  | <5    | 2.8 (0.3 to 10.2)                     | 3.4 (-1.2 to 17)                              | 6.8                  | 0    | -    | -                                     | -                     | -                     | 3832                 |
| Myeloma              | Liver and Intrahepatic Bile Duct | 0   | -     | -                                     | -                                             | -                    | <5   | <5   | 4.1 (0.1 to 22.6)                     | 2 (-0.6 to 13.9)      | 8.3                   | 3832                 |
| Myeloma              | Lung and Bronchus                | <5  | <5    | 1.9 (0.4 to 5.6)                      | 3.7 (-2.5 to 18.8)                            | 7.6                  | <5   | <5   | 1.7 (0.2 to 6.1)                      | 2.1 (-2.4 to 15.8)    | 9.1                   | 3832                 |
| Myeloma              | Melanoma of the Skin             | 0   | -     | -                                     | -                                             | -                    | <5   | <5   | 11.7 (0.3 to 65.3)                    | 2.4 (-0.2 to 14.3)    | 10.1                  | 3832                 |
| Myeloma              | Non-Hodgkin Lymphoma             | <5  | <5    | 1.1 (0 to 6.1)                        | 0.2 (-2.3 to 12.1)                            | 0.4                  | 0    | -    | -                                     | -                     | -                     | 3832                 |
| Myeloma              | Prostate                         | <5  | <5    | 1.1 (0.2 to 3.2)                      | 1.2 (-9.3 to 26.4)                            | 1.4                  | 0    | -    | -                                     | -                     | -                     | 2283                 |
| Myeloma              | Soft Tissue including Heart      | <5  | <5    | 14.9 (1.8 to 53.8)                    | 4.9 (0.3 to 18.5)                             | 9.8                  | <5   | <5   | 19.8 (0.5 to 110.5)                   | 2.5 (-0.1 to 14.4)    | 10.5                  | 3832                 |
| Myeloma              | Thyroid                          | <5  | <5    | 4.9 (1 to 14.4)                       | 6.2 (0 to 21.3)                               | 12.6                 | 0    | -    | -                                     | -                     | -                     | 3832                 |
| Myeloma              | Urinary Bladder                  | <5  | <5    | 3.7 (0.4 to 13.2)                     | 3.8 (-0.8 to 17.4)                            | 7.7                  | <5   | <5   | 13.9 (0.4 to 77.3)                    | 2.4 (-0.1 to 14.4)    | 10.2                  | 3832                 |

| First primary cancer | Subsequent primary cancer        | Obs | Exp. | Standardized incidence ratio (95% CI) | Absolute excess incidence per 10,000 (95% CI) | AEI (%) <sup>a</sup> | Obs. | Exp. | Standardized mortality ratio (95% CI) | AEM (95% CI)            | AE M (%) <sup>b</sup> | Person Years at Risk |
|----------------------|----------------------------------|-----|------|---------------------------------------|-----------------------------------------------|----------------------|------|------|---------------------------------------|-------------------------|-----------------------|----------------------|
| Non-Hodgkin Lymphoma | Acute Lymphocytic Leukemia       | <5  | <5   | 2.2 (0.3 to 8)                        | 0.1 (-0.1 to 0.5)                             | 0.3                  | 6    | 0.5  | <b>12.4 (4.6 to 27)</b>               | <b>0.5 (0.1 to 1)</b>   | 3.1                   | 122395               |
| Non-Hodgkin Lymphoma | Acute Non-Lymphocytic Leukemia   | 28  | 4.2  | <b>6.7 (4.5 to 9.7)</b>               | <b>1.9 (1.2 to 3)</b>                         | 7.1                  | 25   | 2.6  | <b>9.8 (6.3 to 14.4)</b>              | <b>1.8 (1.1 to 2.8)</b> | 12.6                  | 122395               |
| Non-Hodgkin Lymphoma | Anus                             | 12  | 2.7  | <b>4.4 (2.3 to 7.8)</b>               | <b>0.8 (0.3 to 1.5)</b>                       | 2.8                  | <5   | <5   | 3.4 (0.1 to 19.1)                     | 0.1 (0 to 0.4)          | 0.4                   | 122395               |
| Non-Hodgkin Lymphoma | Bones and Joints                 | <5  | <5   | 3.7 (1 to 9.5)                        | 0.2 (0 to 0.7)                                | 0.9                  | <5   | <5   | 2.5 (0.1 to 13.9)                     | 0 (0 to 0.4)            | 0.3                   | 122395               |
| Non-Hodgkin Lymphoma | Breast (F)                       | 129 | 87.3 | <b>1.5 (1.2 to 1.8)</b>               | <b>8.2 (4 to 13)</b>                          | 12.4                 | 24   | 11.4 | <b>2.1 (1.4 to 3.1)</b>               | <b>2.5 (0.8 to 4.8)</b> | 7.1                   | 50571                |
| Non-Hodgkin Lymphoma | Breast (M)                       | <5  | <5   | 5.9 (1.6 to 15.2)                     | 0.5 (0.1 to 1.3)                              | 1.0                  | <5   | <5   | 7.6 (0.2 to 42.4)                     | 0.1 (0 to 0.8)          | 0.5                   | 71823                |
| Non-Hodgkin Lymphoma | Cervix Uteri                     | 7   | 6.0  | 1.2 (0.5 to 2.4)                      | 0.2 (-0.6 to 1.7)                             | 0.3                  | 0    | -    | -                                     | -                       | -                     | 50571                |
| Non-Hodgkin Lymphoma | Chronic Myeloid Leukemia         | <5  | <5   | 1.9 (0.5 to 4.8)                      | 0.2 (-0.1 to 0.7)                             | 0.5                  | <5   | <5   | 10.8 (2.9 to 27.7)                    | 0.3 (0.1 to 0.8)        | 2.0                   | 122395               |
| Non-Hodgkin Lymphoma | Colon and Rectum                 | 40  | 42.9 | 0.9 (0.7 to 1.3)                      | -0.2 (-1.2 to 0.9)                            | -                    | 14   | 12.4 | 1.1 (0.6 to 1.9)                      | 0.1 (-0.4 to 0.9)       | 0.9                   | 122395               |
| Non-Hodgkin Lymphoma | Corpus Uteri, NOS                | 23  | 16.4 | 1.4 (0.9 to 2.1)                      | 1.3 (-0.4 to 3.6)                             | 1.9                  | <5   | <5   | 1.8 (0.4 to 5.3)                      | 0.3 (-0.2 to 1.4)       | 0.8                   | 50571                |
| Non-Hodgkin Lymphoma | Esophagus                        | 13  | 5.1  | <b>2.5 (1.4 to 4.4)</b>               | <b>0.6 (0.1 to 1.4)</b>                       | 2.3                  | 14   | 4.4  | <b>3.2 (1.7 to 5.4)</b>               | <b>0.8 (0.3 to 1.6)</b> | 5.4                   | 122395               |
| Non-Hodgkin Lymphoma | Eye and Orbit                    | <5  | <5   | 1.8 (0.2 to 6.4)                      | 0.1 (-0.1 to 0.5)                             | 0.3                  | 0    | -    | -                                     | -                       | -                     | 122395               |
| Non-Hodgkin Lymphoma | Gallbladder and Other Biliary    | 8   | 2.1  | <b>3.8 (1.6 to 7.4)</b>               | <b>0.5 (0.1 to 1.1)</b>                       | 1.7                  | <5   | <5   | 4.3 (0.9 to 12.6)                     | 0.2 (0 to 0.7)          | 1.3                   | 122395               |
| Non-Hodgkin Lymphoma | Head and Neck                    | 62  | 22.7 | <b>2.7 (2.1 to 3.5)</b>               | <b>3.2 (2 to 4.6)</b>                         | 11.7                 | 8    | 4.4  | 1.8 (0.8 to 3.6)                      | 0.3 (-0.1 to 0.9)       | 2.0                   | 122395               |
| Non-Hodgkin Lymphoma | Hodgkin Lymphoma                 | 33  | 3.9  | <b>8.5 (5.9 to 12)</b>                | <b>2.4 (1.5 to 3.5)</b>                       | 8.7                  | 20   | 0.5  | <b>40.9 (25 to 63.2)</b>              | <b>1.6 (1 to 2.5)</b>   | 11.0                  | 122395               |
| Non-Hodgkin Lymphoma | Kaposi Sarcoma                   | 8   | 2.9  | <b>2.8 (1.2 to 5.5)</b>               | <b>0.4 (0 to 1.1)</b>                         | 1.5                  | 0    | -    | -                                     | -                       | -                     | 122395               |
| Non-Hodgkin Lymphoma | Kidney and Renal Pelvis          | 32  | 19.8 | <b>1.6 (1.1 to 2.3)</b>               | <b>1 (0.2 to 2.1)</b>                         | 3.6                  | 6    | 3.6  | 1.7 (0.6 to 3.6)                      | 0.2 (-0.1 to 0.8)       | 1.3                   | 122395               |
| Non-Hodgkin Lymphoma | Liver and Intrahepatic Bile Duct | 18  | 9.8  | <b>1.8 (1.1 to 2.9)</b>               | <b>0.7 (0.1 to 1.5)</b>                       | 2.4                  | 22   | 6.5  | <b>3.4 (2.1 to 5.1)</b>               | <b>1.3 (0.6 to 2.2)</b> | 8.7                   | 122395               |
| Non-Hodgkin Lymphoma | Lung and Bronchus                | 86  | 46.2 | <b>1.9 (1.5 to 2.3)</b>               | <b>3.3 (1.8 to 4.9)</b>                       | 11.8                 | 66   | 35.4 | <b>1.9 (1.4 to 2.4)</b>               | <b>2.5 (1.3 to 4)</b>   | 17.2                  | 122395               |
| Non-Hodgkin Lymphoma | Melanoma of the Skin             | 37  | 35.3 | 1 (0.7 to 1.4)                        | 0.1 (-0.8 to 1.3)                             | 0.5                  | <5   | <5   | 1 (0.2 to 2.9)                        | 0 (-0.2 to 0.5)         | -                     | 122395               |
| Non-Hodgkin Lymphoma | Mesothelioma                     | <5  | <5   | 6 (1.6 to 15.3)                       | 0.3 (0 to 0.8)                                | 1.0                  | 0    | -    | -                                     | -                       | -                     | 122395               |
| Non-Hodgkin Lymphoma | Pancreas                         | 17  | 10.8 | 1.6 (0.9 to 2.5)                      | 0.5 (-0.1 to 1.3)                             | 1.8                  | 20   | 8.4  | <b>2.4 (1.5 to 3.7)</b>               | <b>0.9 (0.3 to 1.8)</b> | 6.5                   | 122395               |
| Non-Hodgkin Lymphoma | Prostate                         | 57  | 73.9 | 0.8 (0.6 to 1)                        | -2.4 (-4.3 to 0)                              | -                    | <5   | <5   | 1 (0.2 to 3)                          | 0 (-0.3 to 0.8)         | 0.1                   | 71823                |
| Non-Hodgkin Lymphoma | Small Intestine                  | 7   | 2.8  | <b>2.5 (1 to 5.2)</b>                 | <b>0.3 (0 to 1)</b>                           | 1.3                  | 0    | -    | -                                     | -                       | -                     | 122395               |
| Non-Hodgkin Lymphoma | Soft Tissue including Heart      | 5   | 4.0  | 1.3 (0.4 to 2.9)                      | 0.1 (-0.2 to 0.6)                             | 0.3                  | 7    | 1.5  | <b>4.8 (1.9 to 9.8)</b>               | <b>0.5 (0.1 to 1.1)</b> | 3.1                   | 122395               |
| Non-Hodgkin Lymphoma | Stomach                          | 13  | 6.8  | <b>1.9 (1 to 3.3)</b>                 | <b>0.5 (0 to 1.3)</b>                         | 1.9                  | 6    | 3.1  | 1.9 (0.7 to 4.2)                      | 0.2 (-0.1 to 0.8)       | 1.6                   | 122395               |
| Non-Hodgkin Lymphoma | Thyroid                          | 39  | 20.2 | <b>1.9 (1.4 to 2.6)</b>               | <b>1.5 (0.6 to 2.7)</b>                       | 5.6                  | 0    | -    | -                                     | -                       | -                     | 122395               |
| Non-Hodgkin Lymphoma | Urinary Bladder                  | 51  | 17.9 | <b>2.8 (2.1 to 3.7)</b>               | <b>2.7 (1.6 to 4)</b>                         | 9.8                  | 8    | 2.2  | <b>3.6 (1.6 to 7.1)</b>               | <b>0.5 (0.1 to 1.1)</b> | 3.2                   | 122395               |
| Non-Hodgkin Lymphoma | Vagina and Vulva                 | <5  | <5   | 1.3 (0.3 to 3.7)                      | 0.1 (-0.3 to 1.3)                             | 0.2                  | <5   | <5   | 3.1 (0.1 to 17.1)                     | 0.1 (-0.1 to 1)         | 0.4                   | 50571                |
| Ovary                | Acute Non-Lymphocytic Leukemia   | 10  | 2.3  | <b>4.3 (2.1 to 7.9)</b>               | <b>1.1 (0.4 to 2.3)</b>                       | 7.5                  | 7    | 1.4  | <b>4.9 (2 to 10.1)</b>                | <b>0.8 (0.2 to 1.9)</b> | 11.1                  | 69792                |
| Ovary                | Bones and Joints                 | <5  | <5   | 1.8 (0 to 10.2)                       | 0.1 (-0.1 to 0.7)                             | 0.4                  | <5   | <5   | 5.7 (0.1 to 31.6)                     | 0.1 (0 to 0.8)          | 1.6                   | 69792                |
| Ovary                | Brain and ONS                    | 5   | 4.1  | 1.2 (0.4 to 2.8)                      | 0.1 (-0.4 to 1.1)                             | 0.9                  | <5   | <5   | 1.1 (0.2 to 3.3)                      | 0 (-0.3 to 0.9)         | 0.6                   | 69792                |

| First primary cancer | Subsequent primary cancer        | Obs | Exp.  | Standardized incidence ratio (95% CI) | Absolute excess incidence per 10,000 (95% CI) | AEI (%) <sup>a</sup> | Obs. | Exp. | Standardized mortality ratio (95% CI) | AEM (95% CI)            | AE M (%) <sup>b</sup> | Person Years at Risk |
|----------------------|----------------------------------|-----|-------|---------------------------------------|-----------------------------------------------|----------------------|------|------|---------------------------------------|-------------------------|-----------------------|----------------------|
| Ovary                | Breast (F)                       | 101 | 129.6 | 0.8 (0.6 to 0.9)                      | -4.1 (-6.8 to -1)                             | -                    | 19   | 17.8 | 1.1 (0.6 to 1.7)                      | 0.2 (-0.9 to 1.7)       | 2.4                   | 69792                |
| Ovary                | Chronic Myeloid Leukemia         | <5  | <5    | 1 (0 to 5.5)                          | 0 (-0.1 to 0.7)                               | -                    | <5   | <5   | 5.3 (0.1 to 29.8)                     | 0.1 (0 to 0.8)          | 1.6                   | 69792                |
| Ovary                | Colon and Rectum                 | 59  | 23.0  | <b>2.6 (2 to 3.3)</b>                 | <b>5.2 (3.1 to 7.6)</b>                       | 35.3                 | 12   | 6.5  | 1.8 (0.9 to 3.2)                      | 0.8 (0 to 2.1)          | 10.9                  | 69792                |
| Ovary                | Esophagus                        | 0   | -     | -                                     | -                                             | -                    | <5   | <5   | 1.2 (0 to 6.9)                        | 0 (-0.1 to 0.7)         | 0.4                   | 69792                |
| Ovary                | Eye and Orbit                    | <5  | <5    | 1.7 (0 to 9.6)                        | 0.1 (-0.1 to 0.7)                             | 0.4                  | 0    | -    | -                                     | -                       | -                     | 69792                |
| Ovary                | Head and Neck                    | 7   | 6.8   | 1 (0.4 to 2.1)                        | 0 (-0.6 to 1.1)                               | 0.2                  | 0    | -    | -                                     | -                       | -                     | 69792                |
| Ovary                | Hodgkin Lymphoma                 | <5  | <5    | 2.3 (0.6 to 6)                        | 0.3 (-0.1 to 1.2)                             | 2.2                  | 0    | -    | -                                     | -                       | -                     | 69792                |
| Ovary                | Kidney and Renal Pelvis          | 15  | 7.7   | <b>1.9 (1.1 to 3.2)</b>               | <b>1 (0.1 to 2.4)</b>                         | 7.1                  | <5   | <5   | 3 (0.8 to 7.8)                        | 0.4 (0 to 1.3)          | 5.4                   | 69792                |
| Ovary                | Liver and Intrahepatic Bile Duct | 5   | 2.7   | 1.9 (0.6 to 4.4)                      | 0.3 (-0.1 to 1.3)                             | 2.3                  | <5   | <5   | 1.5 (0.3 to 4.4)                      | 0.1 (-0.2 to 1)         | 2.0                   | 69792                |
| Ovary                | Lung and Bronchus                | 34  | 30.3  | 1.1 (0.8 to 1.6)                      | 0.5 (-1 to 2.5)                               | 3.7                  | 29   | 20.3 | 1.4 (1 to 2.1)                        | 1.3 (-0.1 to 3.1)       | 17.4                  | 69792                |
| Ovary                | Mesothelioma                     | <5  | <5    | 3.9 (0.1 to 21.5)                     | 0.1 (0 to 0.8)                                | 0.7                  | 0    | -    | -                                     | -                       | -                     | 69792                |
| Ovary                | Myeloma                          | 5   | 3.4   | 1.5 (0.5 to 3.5)                      | 0.2 (-0.3 to 1.2)                             | 1.6                  | <5   | <5   | 1.7 (0.2 to 6.2)                      | 0.1 (-0.1 to 0.9)       | 1.7                   | 69792                |
| Ovary                | Non-Hodgkin Lymphoma             | 12  | 13.9  | 0.9 (0.4 to 1.5)                      | -0.3 (-1.1 to 1)                              | -                    | <5   | <5   | 1.3 (0.3 to 3.8)                      | 0.1 (-0.2 to 0.9)       | 1.4                   | 69792                |
| Ovary                | Pancreas                         | 9   | 6.0   | 1.5 (0.7 to 2.8)                      | 0.4 (-0.3 to 1.6)                             | 2.9                  | 12   | 4.6  | <b>2.6 (1.4 to 4.6)</b>               | <b>1.1 (0.2 to 2.3)</b> | 14.8                  | 69792                |
| Ovary                | Small Intestine                  | <5  | <5    | 1.4 (0.2 to 4.9)                      | 0.1 (-0.2 to 0.8)                             | 0.5                  | <5   | <5   | 11.1 (1.3 to 40.2)                    | 0.3 (0 to 1)            | 3.6                   | 69792                |
| Ovary                | Soft Tissue including Heart      | <5  | <5    | 2 (0.5 to 5.1)                        | 0.3 (-0.1 to 1.2)                             | 1.9                  | 5    | 0.9  | <b>5.8 (1.9 to 13.6)</b>              | <b>0.6 (0.1 to 1.5)</b> | 8.3                   | 69792                |
| Ovary                | Stomach                          | 5   | 2.9   | 1.7 (0.6 to 4)                        | 0.3 (-0.2 to 1.3)                             | 2.0                  | 6    | 1.4  | <b>4.3 (1.6 to 9.4)</b>               | <b>0.7 (0.1 to 1.7)</b> | 9.2                   | 69792                |
| Ovary                | Thyroid                          | 26  | 17.6  | 1.5 (1 to 2.2)                        | 1.2 (-0.1 to 2.9)                             | 8.2                  | 0    | -    | -                                     | -                       | -                     | 69792                |
| Ovary                | Urinary Bladder                  | 17  | 5.2   | <b>3.3 (1.9 to 5.3)</b>               | <b>1.7 (0.7 to 3.2)</b>                       | 11.6                 | <5   | <5   | 4.1 (0.8 to 11.9)                     | 0.3 (0 to 1.2)          | 4.5                   | 69792                |
| Ovary                | Vagina and Vulva                 | <5  | <5    | 1.1 (0.3 to 2.9)                      | 0.1 (-0.4 to 1)                               | 0.4                  | <5   | <5   | 3.8 (0.5 to 13.9)                     | 0.2 (0 to 1)            | 3.0                   | 69792                |
| Pancreas             | Acute Non-Lymphocytic Leukemia   | <5  | <5    | 9.7 (0.2 to 54.3)                     | 2.8 (-0.2 to 16.9)                            | 5.0                  | <5   | <5   | 15.8 (0.4 to 88.2)                    | 2.9 (-0.1 to 17.1)      | 11.6                  | 3230                 |
| Pancreas             | Brain and ONS                    | <5  | <5    | 5.3 (0.1 to 29.3)                     | 2.5 (-0.5 to 16.7)                            | 4.5                  | 0    | -    | -                                     | -                       | -                     | 3230                 |
| Pancreas             | Breast (F)                       | <5  | <5    | 1.1 (0.3 to 2.9)                      | 2.3 (-11.8 to 32.5)                           | 2.6                  | <5   | <5   | 2 (0.1 to 11.1)                       | 2.4 (-2.3 to 24.5)      | 6.2                   | 2065                 |
| Pancreas             | Colon and Rectum                 | <5  | <5    | 1.8 (0.2 to 6.5)                      | 2.7 (-2.7 to 18.9)                            | 4.9                  | 0    | -    | -                                     | -                       | -                     | 3230                 |
| Pancreas             | Kidney and Renal Pelvis          | <5  | <5    | 6.8 (1.4 to 19.8)                     | 7.9 (0.5 to 25.8)                             | 14.2                 | 0    | -    | -                                     | -                       | -                     | 3230                 |
| Pancreas             | Liver and Intrahepatic Bile Duct | 0   | -     | -                                     | -                                             | -                    | <5   | <5   | 7.6 (0.2 to 42.4)                     | 2.7 (-0.3 to 16.8)      | 10.7                  | 3230                 |
| Pancreas             | Melanoma of the Skin             | <5  | <5    | 4 (0.8 to 11.7)                       | 7 (-0.4 to 24.8)                              | 12.5                 | 0    | -    | -                                     | -                       | -                     | 3230                 |
| Pancreas             | Prostate                         | <5  | <5    | 1.6 (0.2 to 5.9)                      | 6.6 (-8.5 to 51.4)                            | 4.2                  | 0    | -    | -                                     | -                       | -                     | 1164                 |
| Pancreas             | Small Intestine                  | <5  | <5    | 27.8 (3.4 to 100.3)                   | 6 (0.5 to 22.1)                               | 10.7                 | 0    | -    | -                                     | -                       | -                     | 3230                 |
| Pancreas             | Soft Tissue including Heart      | 0   | -     | -                                     | -                                             | -                    | <5   | <5   | 25.5 (0.6 to 142.1)                   | 3 (0 to 17.1)           | 11.9                  | 3230                 |
| Pancreas             | Stomach                          | <5  | <5    | 17.4 (3.6 to 50.8)                    | 8.8 (1.4 to 26.6)                             | 15.7                 | <5   | <5   | 12.3 (0.3 to 68.3)                    | 2.8 (-0.2 to 17)        | 11.3                  | 3230                 |

| First primary cancer        | Subsequent primary cancer        | Obs | Exp. | Standardized incidence ratio (95% CI) | Absolute excess incidence per 10,000 (95% CI) | AEI (%) <sup>a</sup> | Obs. | Exp. | Standardized mortality ratio (95% CI) | AEM (95% CI)               | AE M (%) <sup>b</sup> | Person Years at Risk |
|-----------------------------|----------------------------------|-----|------|---------------------------------------|-----------------------------------------------|----------------------|------|------|---------------------------------------|----------------------------|-----------------------|----------------------|
| Pancreas                    | Thyroid                          | <5  | <5   | 3.2 (0.4 to 11.7)                     | 4.3 (-1.2 to 20.5)                            | 7.7                  | 0    | -    | -                                     | -                          | -                     | 3230                 |
| Pancreas                    | Urinary Bladder                  | <5  | <5   | 5.7 (0.7 to 20.5)                     | 5.1 (-0.3 to 21.3)                            | 9.1                  | <5   | <5   | 21.2 (0.5 to 117.9)                   | 3 (-0.1 to 17.1)           | 11.8                  | 3230                 |
| Small Intestine             | Brain and ONS                    | <5  | <5   | 3.3 (0.1 to 18.5)                     | 1.6 (-0.6 to 12)                              | 3.3                  | <5   | <5   | 5 (0.1 to 28.1)                       | 1.8 (-0.4 to 12.2)         | 2.6                   | 4408                 |
| Small Intestine             | Colon and Rectum                 | 10  | 1.6  | <b>6.2 (3 to 11.5)</b>                | <b>19 (7.2 to 38.1)</b>                       | 39.3                 | 7    | 0.5  | <b>15.2 (6.1 to 31.3)</b>             | <b>14.8 (5.3 to 31.7)</b>  | 21.4                  | 4408                 |
| Small Intestine             | Corpus Uteri, NOS                | <5  | <5   | 2.6 (0.3 to 9.3)                      | 5.6 (-2.4 to 29.6)                            | 5.7                  | 0    | -    | -                                     | -                          | -                     | 2176                 |
| Small Intestine             | Kidney and Renal Pelvis          | <5  | <5   | 1.4 (0 to 7.7)                        | 0.6 (-1.6 to 11)                              | 1.3                  | 0    | -    | -                                     | -                          | -                     | 4408                 |
| Small Intestine             | Liver and Intrahepatic Bile Duct | <5  | <5   | 3 (0.1 to 16.4)                       | 1.5 (-0.7 to 11.9)                            | 3.1                  | <5   | <5   | 13.1 (2.7 to 38.3)                    | 6.3 (0.9 to 19.4)          | 9.1                   | 4408                 |
| Small Intestine             | Ovary                            | <5  | <5   | 5.9 (0.7 to 21.1)                     | 7.6 (-0.5 to 31.6)                            | 7.8                  | 0    | -    | -                                     | -                          | -                     | 2176                 |
| Small Intestine             | Pancreas                         | <5  | <5   | 7.6 (1.6 to 22.1)                     | 5.9 (0.5 to 19)                               | 12.2                 | <5   | <5   | 6.5 (0.8 to 23.6)                     | 3.8 (-0.1 to 15.7)         | 5.5                   | 4408                 |
| Small Intestine             | Prostate                         | <5  | <5   | 1.3 (0.3 to 3.9)                      | 3.4 (-7.3 to 29.2)                            | 3.5                  | 0    | -    | -                                     | -                          | -                     | 2232                 |
| Small Intestine             | Soft Tissue including Heart      | <5  | <5   | 6.9 (0.2 to 38.3)                     | 1.9 (-0.3 to 12.3)                            | 4.0                  | 13   | 0.1  | <b>235.2 (125.3 to 402.3)</b>         | <b>29.4 (15.6 to 50.3)</b> | 42.3                  | 4408                 |
| Small Intestine             | Stomach                          | <5  | <5   | 8.4 (1 to 30.2)                       | 4 (0 to 15.8)                                 | 8.3                  | <5   | <5   | 27.1 (5.6 to 79.2)                    | 6.6 (1.2 to 19.6)          | 9.4                   | 4408                 |
| Small Intestine             | Testis                           | <5  | <5   | 5.7 (0.1 to 31.5)                     | 3.7 (-0.7 to 24.2)                            | 3.9                  | 0    | -    | -                                     | -                          | -                     | 2232                 |
| Small Intestine             | Thyroid                          | <5  | <5   | 1.2 (0 to 6.9)                        | 0.4 (-1.8 to 10.8)                            | 0.9                  | 0    | -    | -                                     | -                          | -                     | 4408                 |
| Small Intestine             | Urinary Bladder                  | <5  | <5   | 3.5 (0.4 to 12.8)                     | 3.3 (-0.7 to 15.1)                            | 6.7                  | 0    | -    | -                                     | -                          | -                     | 4408                 |
| Soft Tissue including Heart | Acute Lymphocytic Leukemia       | <5  | <5   | 5.9 (0.7 to 21.2)                     | 0.3 (0 to 1.4)                                | 2.2                  | <5   | <5   | 5.4 (0.1 to 30.1)                     | 0.2 (0 to 1.1)             | 0.9                   | 47565                |
| Soft Tissue including Heart | Acute Non-Lymphocytic Leukemia   | 5   | 1.6  | <b>3.1 (1 to 7.2)</b>                 | <b>0.7 (0 to 2.1)</b>                         | 4.6                  | <5   | <5   | 4 (1.1 to 10.2)                       | 0.6 (0 to 1.9)             | 3.2                   | 47565                |
| Soft Tissue including Heart | Anus                             | <5  | <5   | 3 (0.6 to 8.7)                        | 0.4 (-0.1 to 1.6)                             | 2.7                  | 0    | -    | -                                     | -                          | -                     | 47565                |
| Soft Tissue including Heart | Bones and Joints                 | <5  | <5   | 4.9 (0.6 to 17.8)                     | 0.3 (0 to 1.4)                                | 2.2                  | 25   | 0.2  | <b>162.1 (104.9 to 239.2)</b>         | <b>5.2 (3.4 to 7.7)</b>    | 26.6                  | 47565                |
| Soft Tissue including Heart | Brain and ONS                    | 12  | 3.2  | <b>3.8 (2 to 6.6)</b>                 | <b>1.9 (0.6 to 3.7)</b>                       | 11.9                 | 11   | 2.1  | <b>5.3 (2.7 to 9.6)</b>               | <b>1.9 (0.7 to 3.7)</b>    | 9.6                   | 47565                |
| Soft Tissue including Heart | Breast (F)                       | 50  | 36.7 | <b>1.4 (1 to 1.8)</b>                 | <b>6 (0.2 to 13.1)</b>                        | 18.1                 | 16   | 5.0  | <b>3.2 (1.8 to 5.2)</b>               | <b>4.9 (1.9 to 9.4)</b>    | 11.8                  | 22324                |
| Soft Tissue including Heart | Chronic Myeloid Leukemia         | <5  | <5   | 2.5 (0.3 to 8.9)                      | 0.3 (-0.1 to 1.3)                             | 1.6                  | <5   | <5   | 6.8 (0.2 to 37.6)                     | 0.2 (0 to 1.1)             | 0.9                   | 47565                |
| Soft Tissue including Heart | Corpus Uteri, NOS                | 10  | 7.0  | 1.4 (0.7 to 2.6)                      | 1.4 (-1 to 5.1)                               | 4.1                  | <5   | <5   | 5.4 (1.5 to 13.8)                     | 1.5 (0.2 to 4.3)           | 3.5                   | 22324                |
| Soft Tissue including Heart | Esophagus                        | <5  | <5   | 0.5 (0 to 2.9)                        | -0.2 (-0.4 to 0.8)                            | -                    | <5   | <5   | 1.2 (0.1 to 4.4)                      | 0.1 (-0.3 to 1.2)          | 0.4                   | 47565                |
| Soft Tissue including Heart | Gallbladder and Other Biliary    | <5  | <5   | 2.3 (0.3 to 8.5)                      | 0.2 (-0.1 to 1.3)                             | 1.6                  | 0    | -    | -                                     | -                          | -                     | 47565                |
| Soft Tissue including Heart | Head and Neck                    | 18  | 8.3  | <b>2.2 (1.3 to 3.4)</b>               | <b>2 (0.5 to 4.2)</b>                         | 13.1                 | 5    | 1.7  | 3 (1 to 7)                            | 0.7 (0 to 2.1)             | 3.6                   | 47565                |
| Soft Tissue including Heart | Hodgkin Lymphoma                 | <5  | <5   | 2 (0.4 to 5.8)                        | 0.3 (-0.2 to 1.5)                             | 2.0                  | <5   | <5   | 5.2 (0.1 to 28.8)                     | 0.2 (0 to 1.1)             | 0.9                   | 47565                |
| Soft Tissue including Heart | Kidney and Renal Pelvis          | 8   | 7.3  | 1.1 (0.5 to 2.1)                      | 0.1 (-0.8 to 1.8)                             | 0.9                  | 0    | -    | -                                     | -                          | -                     | 47565                |
| Soft Tissue including Heart | Liver and Intrahepatic Bile Duct | <5  | <5   | 0.8 (0.2 to 2.3)                      | -0.2 (-0.7 to 1)                              | -                    | <5   | <5   | 1.6 (0.4 to 4.1)                      | 0.3 (-0.3 to 1.6)          | 1.6                   | 47565                |
| Soft Tissue including Heart | Lung and Bronchus                | 19  | 18.8 | 1 (0.6 to 1.6)                        | 0 (-1.6 to 2.3)                               | 0.3                  | 28   | 14.2 | <b>2 (1.3 to 2.9)</b>                 | <b>2.9 (0.9 to 5.5)</b>    | 14.8                  | 47565                |

| First primary cancer        | Subsequent primary cancer        | Obs | Exp. | Standardized incidence ratio (95% CI) | Absolute excess incidence per 10,000 (95% CI) | AEI (%) <sup>a</sup> | Obs. | Exp. | Standardized mortality ratio (95% CI) | AEM (95% CI)             | AE M (%) <sup>b</sup> | Person Years at Risk |
|-----------------------------|----------------------------------|-----|------|---------------------------------------|-----------------------------------------------|----------------------|------|------|---------------------------------------|--------------------------|-----------------------|----------------------|
| Soft Tissue including Heart | Melanoma of the Skin             | 16  | 12.8 | 1.2 (0.7 to 2)                        | 0.7 (-0.8 to 2.8)                             | 4.3                  | 6    | 1.1  | <b>5.5 (2 to 11.9)</b>                | <b>1 (0.2 to 2.5)</b>    | 5.2                   | 47565                |
| Soft Tissue including Heart | Ovary                            | <5  | <5   | 1 (0.2 to 2.8)                        | 0 (-1.1 to 2.5)                               | -                    | <5   | <5   | 2.2 (0.4 to 6.4)                      | 0.7 (-0.3 to 3.3)        | 1.7                   | 22324                |
| Soft Tissue including Heart | Penis and Other Genital          | <5  | <5   | 4.7 (0.1 to 26.2)                     | 0.3 (-0.1 to 2.1)                             | 1.1                  | 0    | -    | -                                     | -                        | -                     | 25240                |
| Soft Tissue including Heart | Small Intestine                  | <5  | <5   | 1.9 (0.2 to 6.8)                      | 0.2 (-0.2 to 1.3)                             | 1.3                  | 0    | -    | -                                     | -                        | -                     | 47565                |
| Soft Tissue including Heart | Stomach                          | 7   | 2.6  | <b>2.7 (1.1 to 5.5)</b>               | <b>0.9 (0 to 2.5)</b>                         | 5.9                  | <5   | <5   | 2.5 (0.5 to 7.2)                      | 0.4 (-0.1 to 1.6)        | 1.9                   | 47565                |
| Soft Tissue including Heart | Testis                           | <5  | <5   | 1.4 (0.3 to 4.2)                      | 0.4 (-0.6 to 2.6)                             | 1.2                  | 0    | -    | -                                     | -                        | -                     | 25240                |
| Soft Tissue including Heart | Thyroid                          | 15  | 7.8  | <b>1.9 (1.1 to 3.2)</b>               | <b>1.5 (0.1 to 3.6)</b>                       | 9.8                  | 0    | -    | -                                     | -                        | -                     | 47565                |
| Soft Tissue including Heart | Urinary Bladder                  | 9   | 6.7  | 1.3 (0.6 to 2.6)                      | 0.5 (-0.5 to 2.2)                             | 3.1                  | <5   | <5   | 2.3 (0.3 to 8.4)                      | 0.2 (-0.1 to 1.3)        | 1.2                   | 47565                |
| Stomach                     | Acute Non-Lymphocytic Leukemia   | <5  | <5   | 7.8 (0.9 to 28)                       | 2.6 (0 to 10.2)                               | 9.8                  | <5   | <5   | 12.5 (1.5 to 45.2)                    | 2.7 (0.1 to 10.3)        | 9.9                   | 6829                 |
| Stomach                     | Brain and ONS                    | <5  | <5   | 2.3 (0.1 to 12.6)                     | 0.8 (-0.6 to 7.5)                             | 3.1                  | 0    | -    | -                                     | -                        | -                     | 6829                 |
| Stomach                     | Breast (F)                       | 10  | 6.8  | 1.5 (0.7 to 2.7)                      | 9.1 (-5.5 to 32.7)                            | 18.2                 | <5   | <5   | 1.1 (0 to 6)                          | 0.2 (-2.5 to 13.1)       | 0.4                   | 3554                 |
| Stomach                     | Colon and Rectum                 | 7   | 2.9  | 2.4 (1 to 4.9)                        | 6 (-0.2 to 16.8)                              | 22.9                 | 5    | 0.8  | <b>6 (1.9 to 14)</b>                  | <b>6.1 (1.2 to 15.9)</b> | 22.5                  | 6829                 |
| Stomach                     | Esophagus                        | <5  | <5   | 6.3 (0.8 to 22.7)                     | 2.5 (-0.1 to 10.1)                            | 9.5                  | 6    | 0.3  | <b>22.8 (8.4 to 49.6)</b>             | <b>8.4 (2.8 to 18.7)</b> | 31.0                  | 6829                 |
| Stomach                     | Head and Neck                    | <5  | <5   | 1.5 (0.2 to 5.3)                      | 0.9 (-1.7 to 8.6)                             | 3.5                  | <5   | <5   | 3.4 (0.1 to 18.9)                     | 1 (-0.4 to 7.7)          | 3.8                   | 6829                 |
| Stomach                     | Liver and Intrahepatic Bile Duct | <5  | <5   | 2.7 (0.3 to 9.9)                      | 1.9 (-0.7 to 9.5)                             | 7.2                  | <5   | <5   | 2.1 (0.1 to 11.9)                     | 0.8 (-0.6 to 7.5)        | 2.9                   | 6829                 |
| Stomach                     | Lung and Bronchus                | <5  | <5   | 1.2 (0.3 to 3.1)                      | 1 (-3.3 to 10.1)                              | 3.9                  | <5   | <5   | 1.7 (0.5 to 4.3)                      | 2.4 (-1.9 to 11.5)       | 8.8                   | 6829                 |
| Stomach                     | Melanoma of the Skin             | <5  | <5   | 1.3 (0.2 to 4.6)                      | 0.6 (-2 to 8.3)                               | 2.3                  | 0    | -    | -                                     | -                        | -                     | 6829                 |
| Stomach                     | Pancreas                         | <5  | <5   | 1.3 (0 to 7.5)                        | 0.4 (-1 to 7.1)                               | 1.5                  | 0    | -    | -                                     | -                        | -                     | 6829                 |
| Stomach                     | Prostate                         | 5   | 4.5  | 1.1 (0.4 to 2.6)                      | 1.4 (-8.9 to 21.8)                            | 2.6                  | 0    | -    | -                                     | -                        | -                     | 3275                 |
| Stomach                     | Soft Tissue including Heart      | <5  | <5   | 4.2 (0.1 to 23.5)                     | 1.1 (-0.3 to 7.8)                             | 4.3                  | <5   | <5   | 33 (6.8 to 96.4)                      | 4.3 (0.8 to 12.7)        | 15.7                  | 6829                 |
| Testis                      | Acute Lymphocytic Leukemia       | <5  | <5   | 1.4 (0.3 to 4)                        | 0 (-0.1 to 0.2)                               | 0.3                  | <5   | <5   | 1.7 (0.2 to 6)                        | 0 (0 to 0.2)             | 0.4                   | 263825               |
| Testis                      | Acute Non-Lymphocytic Leukemia   | 21  | 9.6  | <b>2.2 (1.4 to 3.3)</b>               | <b>0.4 (0.1 to 0.9)</b>                       | 4.1                  | 22   | 6.1  | <b>3.6 (2.3 to 5.5)</b>               | <b>0.6 (0.3 to 1)</b>    | 7.5                   | 263825               |
| Testis                      | Anus                             | <5  | <5   | 0.8 (0.2 to 2.1)                      | 0 (-0.1 to 0.2)                               | -                    | <5   | <5   | 3.6 (0.4 to 13.1)                     | 0.1 (0 to 0.3)           | 0.7                   | 263825               |
| Testis                      | Breast (M)                       | <5  | <5   | 1.3 (0.3 to 3.8)                      | 0 (-0.1 to 0.2)                               | 0.2                  | 0    | -    | -                                     | -                        | -                     | 263825               |
| Testis                      | Chronic Myeloid Leukemia         | 12  | 5.3  | <b>2.3 (1.2 to 4)</b>                 | <b>0.3 (0 to 0.6)</b>                         | 2.4                  | <5   | <5   | 2.2 (0.3 to 8)                        | 0 (0 to 0.2)             | 0.5                   | 263825               |
| Testis                      | Colon and Rectum                 | 120 | 98.4 | <b>1.2 (1 to 1.5)</b>                 | <b>0.8 (0 to 1.7)</b>                         | 7.8                  | 44   | 29.1 | <b>1.5 (1.1 to 2)</b>                 | <b>0.6 (0.1 to 1.1)</b>  | 7.0                   | 263825               |
| Testis                      | Esophagus                        | 22  | 16.4 | 1.3 (0.8 to 2)                        | 0.2 (-0.1 to 0.6)                             | 2.0                  | 26   | 14.6 | <b>1.8 (1.2 to 2.6)</b>               | <b>0.4 (0.1 to 0.9)</b>  | 5.4                   | 263825               |
| Testis                      | Eye and Orbit                    | <5  | <5   | 1.4 (0.4 to 3.6)                      | 0 (-0.1 to 0.3)                               | 0.4                  | <5   | <5   | 9.4 (1.1 to 34)                       | 0.1 (0 to 0.3)           | 0.8                   | 263825               |
| Testis                      | Gallbladder and Other Biliary    | 8   | 4.4  | 1.8 (0.8 to 3.6)                      | 0.1 (0 to 0.4)                                | 1.3                  | 6    | 1.3  | <b>4.7 (1.7 to 10.3)</b>              | <b>0.2 (0 to 0.4)</b>    | 2.2                   | 263825               |
| Testis                      | Kidney and Renal Pelvis          | 91  | 52.9 | <b>1.7 (1.4 to 2.1)</b>               | <b>1.4 (0.8 to 2.2)</b>                       | 13.8                 | 31   | 10.4 | <b>3 (2 to 4.2)</b>                   | <b>0.8 (0.4 to 1.3)</b>  | 9.7                   | 263825               |
| Testis                      | Liver and Intrahepatic Bile Duct | 24  | 29.2 | 0.8 (0.5 to 1.2)                      | -0.2 (-0.5 to 0.2)                            | -                    | 32   | 19.0 | <b>1.7 (1.2 to 2.4)</b>               | <b>0.5 (0.1 to 1)</b>    | 6.1                   | 263825               |

| First primary cancer | Subsequent primary cancer        | Obs | Exp.  | Standardized incidence ratio (95% CI) | Absolute excess incidence per 10,000 (95% CI) | AEI (%) <sup>a</sup> | Obs. | Exp. | Standardized mortality ratio (95% CI) | AEM (95% CI)            | AE M (%) <sup>b</sup> | Person Years at Risk |
|----------------------|----------------------------------|-----|-------|---------------------------------------|-----------------------------------------------|----------------------|------|------|---------------------------------------|-------------------------|-----------------------|----------------------|
| Testis               | Lung and Bronchus                | 109 | 100.4 | 1.1 (0.9 to 1.3)                      | 0.3 (-0.4 to 1.2)                             | 3.1                  | 101  | 84.0 | 1.2 (1 to 1.5)                        | 0.6 (-0.1 to 1.5)       | 8.0                   | 263825               |
| Testis               | Melanoma of the Skin             | 83  | 88.5  | 0.9 (0.7 to 1.2)                      | -0.2 (-0.8 to 0.5)                            | -                    | 10   | 8.9  | 1.1 (0.5 to 2.1)                      | 0 (-0.2 to 0.4)         | 0.5                   | 263825               |
| Testis               | Mesothelioma                     | <5  | <5    | 1.6 (0.3 to 4.8)                      | 0 (0 to 0.3)                                  | 0.4                  | 0    | -    | -                                     | -                       | -                     | 263825               |
| Testis               | Myeloma                          | 20  | 14.5  | 1.4 (0.8 to 2.1)                      | 0.2 (-0.1 to 0.6)                             | 2.0                  | 5    | 4.8  | 1 (0.3 to 2.4)                        | 0 (-0.1 to 0.3)         | 0.1                   | 263825               |
| Testis               | Non-Hodgkin Lymphoma             | 70  | 73.0  | 1 (0.7 to 1.2)                        | -0.1 (-0.7 to 0.6)                            | -                    | 15   | 13.1 | 1.1 (0.6 to 1.9)                      | 0.1 (-0.2 to 0.4)       | 0.9                   | 263825               |
| Testis               | Pancreas                         | 75  | 26.0  | <b>2.9 (2.3 to 3.6)</b>               | <b>1.9 (1.3 to 2.6)</b>                       | 17.8                 | 74   | 20.7 | <b>3.6 (2.8 to 4.5)</b>               | <b>2 (1.4 to 2.7)</b>   | 25.1                  | 263825               |
| Testis               | Penis and Other Genital          | 6   | 2.1   | <b>2.8 (1 to 6.1)</b>                 | <b>0.1 (0 to 0.4)</b>                         | 1.4                  | <5   | <5   | 2.8 (0.1 to 15.4)                     | 0 (0 to 0.2)            | 0.3                   | 263825               |
| Testis               | Prostate                         | 248 | 265.5 | 0.9 (0.8 to 1.1)                      | -0.7 (-1.8 to 0.6)                            | -                    | 21   | 9.8  | <b>2.1 (1.3 to 3.3)</b>               | <b>0.4 (0.1 to 0.8)</b> | 5.3                   | 263825               |
| Testis               | Small Intestine                  | 9   | 6.3   | 1.4 (0.7 to 2.7)                      | 0.1 (-0.1 to 0.4)                             | 1.0                  | <5   | <5   | 2.5 (0.3 to 9.2)                      | 0 (0 to 0.2)            | 0.6                   | 263825               |
| Testis               | Soft Tissue including Heart      | 22  | 9.4   | <b>2.4 (1.5 to 3.6)</b>               | <b>0.5 (0.2 to 0.9)</b>                       | 4.6                  | 10   | 3.3  | <b>3.1 (1.5 to 5.6)</b>               | <b>0.3 (0.1 to 0.6)</b> | 3.2                   | 263825               |
| Testis               | Stomach                          | 32  | 16.9  | <b>1.9 (1.3 to 2.7)</b>               | <b>0.6 (0.2 to 1.1)</b>                       | 5.5                  | 24   | 7.4  | <b>3.2 (2.1 to 4.8)</b>               | <b>0.6 (0.3 to 1.1)</b> | 7.8                   | 263825               |
| Testis               | Thyroid                          | 44  | 24.4  | <b>1.8 (1.3 to 2.4)</b>               | <b>0.7 (0.3 to 1.3)</b>                       | 7.1                  | <5   | <5   | 3.5 (0.7 to 10.2)                     | 0.1 (0 to 0.3)          | 1.0                   | 263825               |
| Testis               | Urinary Bladder                  | 112 | 55.7  | <b>2 (1.7 to 2.4)</b>                 | <b>2.1 (1.4 to 3)</b>                         | 20.4                 | 17   | 6.6  | <b>2.6 (1.5 to 4.1)</b>               | <b>0.4 (0.1 to 0.8)</b> | 4.9                   | 263825               |
| Thyroid              | Acute Non-Lymphocytic Leukemia   | 11  | 11.5  | 1 (0.5 to 1.7)                        | 0 (-0.2 to 0.2)                               | -                    | 10   | 6.9  | 1.4 (0.7 to 2.7)                      | 0.1 (-0.1 to 0.3)       | 6.4                   | 336131               |
| Thyroid              | Anus                             | 10  | 8.3   | 1.2 (0.6 to 2.2)                      | 0.1 (-0.1 to 0.3)                             | 1.3                  | <5   | <5   | 2.2 (0.3 to 8)                        | 0 (0 to 0.2)            | 2.3                   | 336131               |
| Thyroid              | Bones and Joints                 | 7   | 2.7   | <b>2.6 (1 to 5.3)</b>                 | <b>0.1 (0 to 0.3)</b>                         | 3.1                  | <5   | <5   | 3.3 (0.7 to 9.5)                      | 0.1 (0 to 0.2)          | 4.3                   | 336131               |
| Thyroid              | Brain and ONS                    | 25  | 21.3  | 1.2 (0.8 to 1.7)                      | 0.1 (-0.2 to 0.5)                             | 2.7                  | 23   | 13.8 | <b>1.7 (1.1 to 2.5)</b>               | <b>0.3 (0 to 0.6)</b>   | 19.1                  | 336131               |
| Thyroid              | Breast (F)                       | 521 | 478.5 | 1.1 (1 to 1.2)                        | 1.6 (0 to 3.3)                                | 31.0                 | 68   | 60.5 | 1.1 (0.9 to 1.4)                      | 0.3 (-0.3 to 0.9)       | 15.5                  | 270379               |
| Thyroid              | Chronic Myeloid Leukemia         | 9   | 5.3   | 1.7 (0.8 to 3.2)                      | 0.1 (0 to 0.4)                                | 2.7                  | 0    | -    | -                                     | -                       | -                     | 336131               |
| Thyroid              | Eye and Orbit                    | <5  | <5    | 0.7 (0.1 to 2.4)                      | 0 (-0.1 to 0.1)                               | -                    | <5   | <5   | 8.9 (1.1 to 32)                       | 0.1 (0 to 0.2)          | 3.7                   | 336131               |
| Thyroid              | Head and Neck                    | 59  | 44.0  | <b>1.3 (1 to 1.7)</b>                 | <b>0.4 (0 to 1)</b>                           | 11.0                 | 7    | 8.0  | 0.9 (0.4 to 1.8)                      | 0 (-0.2 to 0.2)         | -                     | 336131               |
| Thyroid              | Kidney and Renal Pelvis          | 75  | 43.8  | <b>1.7 (1.3 to 2.1)</b>               | <b>0.9 (0.5 to 1.5)</b>                       | 22.8                 | 8    | 7.6  | 1 (0.5 to 2.1)                        | 0 (-0.1 to 0.2)         | 0.8                   | 336131               |
| Thyroid              | Liver and Intrahepatic Bile Duct | 14  | 18.5  | 0.8 (0.4 to 1.3)                      | -0.1 (-0.3 to 0.1)                            | -                    | 13   | 12.9 | 1 (0.5 to 1.7)                        | 0 (-0.2 to 0.3)         | 0.1                   | 336131               |
| Thyroid              | Mesothelioma                     | <5  | <5    | 1.9 (0.4 to 5.6)                      | 0 (0 to 0.2)                                  | 1.0                  | 0    | -    | -                                     | -                       | -                     | 336131               |
| Thyroid              | Myeloma                          | 12  | 15.9  | 0.8 (0.4 to 1.3)                      | -0.1 (-0.3 to 0.2)                            | -                    | 7    | 5.3  | 1.3 (0.5 to 2.7)                      | 0.1 (-0.1 to 0.3)       | 3.6                   | 336131               |
| Thyroid              | Non-Hodgkin Lymphoma             | 83  | 70.8  | 1.2 (0.9 to 1.5)                      | 0.4 (-0.1 to 1)                               | 8.9                  | 18   | 11.7 | 1.5 (0.9 to 2.4)                      | 0.2 (0 to 0.5)          | 13.0                  | 336131               |
| Thyroid              | Ovary                            | 26  | 40.3  | 0.6 (0.4 to 0.9)                      | -0.5 (-0.9 to -0.1)                           | -                    | 20   | 17.8 | 1.1 (0.7 to 1.7)                      | 0.1 (-0.2 to 0.5)       | 4.6                   | 270379               |
| Thyroid              | Pancreas                         | 29  | 28.8  | 1 (0.7 to 1.4)                        | 0 (-0.3 to 0.4)                               | 0.1                  | 19   | 21.9 | 0.9 (0.5 to 1.4)                      | -0.1 (-0.3 to 0.2)      | -                     | 336131               |
| Thyroid              | Prostate                         | 96  | 88.7  | 1.1 (0.9 to 1.3)                      | 1.1 (-1.7 to 4.3)                             | 5.3                  | <5   | <5   | 0.3 (0 to 1.5)                        | -0.4 (-0.6 to 0.3)      | -                     | 65751                |
| Thyroid              | Small Intestine                  | 6   | 7.2   | 0.8 (0.3 to 1.8)                      | 0 (-0.1 to 0.2)                               | -                    | <5   | <5   | 1.2 (0 to 6.6)                        | 0 (0 to 0.1)            | 0.3                   | 336131               |
| Thyroid              | Soft Tissue including Heart      | 14  | 10.2  | 1.4 (0.8 to 2.3)                      | 0.1 (-0.1 to 0.4)                             | 2.8                  | 11   | 4.0  | <b>2.8 (1.4 to 5)</b>                 | <b>0.2 (0 to 0.5)</b>   | 14.6                  | 336131               |



| First primary cancer | Subsequent primary cancer        | Obs | Exp. | Standardized incidence ratio (95% CI) | Absolute excess incidence per 10,000 (95% CI) | AEI (%) <sup>a</sup> | Obs. | Exp. | Standardized mortality ratio (95% CI) | AEM (95% CI)             | AE M (%) <sup>b</sup> | Person Years at Risk |
|----------------------|----------------------------------|-----|------|---------------------------------------|-----------------------------------------------|----------------------|------|------|---------------------------------------|--------------------------|-----------------------|----------------------|
| Thyroid              | Stomach                          | 26  | 16.0 | <b>1.6 (1.1 to 2.4)</b>               | <b>0.3 (0 to 0.7)</b>                         | 7.3                  | 9    | 7.4  | 1.2 (0.6 to 2.3)                      | 0 (-0.1 to 0.3)          | 3.4                   | 336131               |
| Thyroid              | Urinary Bladder                  | 20  | 35.6 | 0.6 (0.3 to 0.9)                      | -0.5 (-0.7 to -0.1)                           | -                    | 6    | 4.7  | 1.3 (0.5 to 2.8)                      | 0 (-0.1 to 0.2)          | 2.8                   | 336131               |
| Urinary Bladder      | Acute Lymphocytic Leukemia       | <5  | <5   | 2.4 (0.1 to 13.2)                     | 0.1 (-0.1 to 1)                               | 1.1                  | 0    | -    | -                                     | -                        | -                     | 50379                |
| Urinary Bladder      | Anus                             | <5  | <5   | 1.5 (0.2 to 5.4)                      | 0.1 (-0.2 to 1.2)                             | 1.2                  | 0    | -    | -                                     | -                        | -                     | 50379                |
| Urinary Bladder      | Breast (F)                       | 29  | 28.2 | 1 (0.7 to 1.5)                        | 0.6 (-6.7 to 10.3)                            | 1.5                  | <5   | <5   | 1 (0.3 to 2.6)                        | 0.1 (-2.1 to 4.8)        | 0.4                   | 13136                |
| Urinary Bladder      | Breast (M)                       | <5  | <5   | 1.9 (0 to 10.3)                       | 0.1 (-0.1 to 1.4)                             | 0.8                  | <5   | <5   | 9.2 (0.2 to 51.5)                     | 0.2 (0 to 1.5)           | 2.8                   | 37243                |
| Urinary Bladder      | Chronic Myeloid Leukemia         | <5  | <5   | 3.4 (0.9 to 8.7)                      | 0.6 (0 to 1.8)                                | 5.2                  | <5   | <5   | 4.2 (0.1 to 23.7)                     | 0.2 (0 to 1.1)           | 2.4                   | 50379                |
| Urinary Bladder      | Colon and Rectum                 | 26  | 25.6 | 1 (0.7 to 1.5)                        | 0.1 (-1.7 to 2.5)                             | 0.7                  | 7    | 8.1  | 0.9 (0.3 to 1.8)                      | -0.2 (-1 to 1.3)         | -                     | 50379                |
| Urinary Bladder      | Corpus Uteri, NOS                | 6   | 5.7  | 1 (0.4 to 2.3)                        | 0.2 (-2.7 to 5.6)                             | 0.5                  | 0    | -    | -                                     | -                        | -                     | 13136                |
| Urinary Bladder      | Gallbladder and Other Biliary    | <5  | <5   | 0.7 (0 to 4.1)                        | -0.1 (-0.3 to 0.8)                            | -                    | <5   | <5   | 2.3 (0.1 to 12.6)                     | 0.1 (-0.1 to 1)          | 1.7                   | 50379                |
| Urinary Bladder      | Hodgkin Lymphoma                 | <5  | <5   | 0.6 (0 to 3.4)                        | -0.1 (-0.3 to 0.8)                            | -                    | <5   | <5   | 3.6 (0.1 to 20.1)                     | 0.1 (0 to 1.1)           | 2.2                   | 50379                |
| Urinary Bladder      | Kidney and Renal Pelvis          | 37  | 12.4 | <b>3 (2.1 to 4.1)</b>                 | <b>4.9 (2.7 to 7.7)</b>                       | 45.0                 | 9    | 2.7  | <b>3.3 (1.5 to 6.3)</b>               | <b>1.2 (0.3 to 2.9)</b>  | 19.4                  | 50379                |
| Urinary Bladder      | Lung and Bronchus                | 56  | 33.6 | <b>1.7 (1.3 to 2.2)</b>               | <b>4.4 (1.7 to 7.8)</b>                       | 41.1                 | 45   | 27.0 | <b>1.7 (1.2 to 2.2)</b>               | <b>3.6 (1.2 to 6.6)</b>  | 55.7                  | 50379                |
| Urinary Bladder      | Melanoma of the Skin             | 19  | 20.7 | 0.9 (0.6 to 1.4)                      | -0.3 (-1.8 to 1.8)                            | -                    | <5   | <5   | 1.9 (0.5 to 4.9)                      | 0.4 (-0.2 to 1.6)        | 5.9                   | 50379                |
| Urinary Bladder      | Prostate                         | 47  | 68.2 | 0.7 (0.5 to 0.9)                      | -5.7 (-9.1 to -1.5)                           | -                    | 5    | 3.1  | 1.6 (0.5 to 3.8)                      | 0.5 (-0.4 to 2.3)        | 5.9                   | 37243                |
| Urinary Bladder      | Soft Tissue including Heart      | <5  | <5   | 0.5 (0 to 2.7)                        | -0.2 (-0.4 to 0.7)                            | -                    | <5   | <5   | 1.2 (0 to 6.9)                        | 0 (-0.2 to 0.9)          | 0.6                   | 50379                |
| Urinary Bladder      | Stomach                          | 5   | 4.4  | 1.1 (0.4 to 2.7)                      | 0.1 (-0.5 to 1.4)                             | 1.1                  | <5   | <5   | 1.5 (0.3 to 4.4)                      | 0.2 (-0.3 to 1.3)        | 3.2                   | 50379                |
| Urinary Bladder      | Testis                           | <5  | <5   | 0.4 (0 to 2.2)                        | -0.4 (-0.7 to 0.8)                            | -                    | <5   | <5   | 7.9 (0.2 to 44)                       | 0.2 (0 to 1.5)           | 2.7                   | 37243                |
| Urinary Bladder      | Vagina and Vulva                 | <5  | <5   | 1.3 (0 to 7)                          | 0.2 (-0.6 to 3.6)                             | 0.4                  | 0    | -    | -                                     | -                        | -                     | 13136                |
| Vagina and Vulva     | Acute Non-Lymphocytic Leukemia   | <5  | <5   | 3.1 (0.4 to 11.4)                     | 0.7 (-0.2 to 3.4)                             | 5.3                  | <5   | <5   | 2.6 (0.1 to 14.5)                     | 0.3 (-0.2 to 2.7)        | 1.7                   | 19471                |
| Vagina and Vulva     | Anus                             | <5  | <5   | 3.7 (0.5 to 13.5)                     | 0.8 (-0.1 to 3.4)                             | 5.7                  | 0    | -    | -                                     | -                        | -                     | 19471                |
| Vagina and Vulva     | Bones and Joints                 | 0   | -    | -                                     | -                                             | -                    | <5   | <5   | 20.6 (0.5 to 115.1)                   | 0.5 (0 to 2.8)           | 2.6                   | 19471                |
| Vagina and Vulva     | Brain and ONS                    | <5  | <5   | 0.9 (0 to 5)                          | -0.1 (-0.6 to 2.3)                            | -                    | <5   | <5   | 1.4 (0 to 7.6)                        | 0.1 (-0.4 to 2.5)        | 0.7                   | 19471                |
| Vagina and Vulva     | Breast (F)                       | 31  | 36.0 | 0.9 (0.6 to 1.2)                      | -2.5 (-7.6 to 4.1)                            | -                    | 10   | 5.0  | 2 (1 to 3.7)                          | 2.6 (-0.1 to 6.9)        | 13.8                  | 19471                |
| Vagina and Vulva     | Cervix Uteri                     | <5  | <5   | 0.4 (0 to 2.4)                        | -0.7 (-1.2 to 1.7)                            | -                    | 6    | 0.7  | <b>8 (2.9 to 17.5)</b>                | <b>2.7 (0.7 to 6.3)</b>  | 14.5                  | 19471                |
| Vagina and Vulva     | Colon and Rectum                 | 9   | 6.4  | 1.4 (0.6 to 2.7)                      | 1.4 (-1.1 to 5.5)                             | 10.2                 | <5   | <5   | 1.7 (0.3 to 4.9)                      | 0.6 (-0.6 to 3.6)        | 3.3                   | 19471                |
| Vagina and Vulva     | Corpus Uteri, NOS                | 6   | 7.1  | 0.8 (0.3 to 1.8)                      | -0.5 (-2.5 to 3.1)                            | -                    | <5   | <5   | 2.7 (0.3 to 9.6)                      | 0.6 (-0.3 to 3.3)        | 3.4                   | 19471                |
| Vagina and Vulva     | Gallbladder and Other Biliary    | 0   | -    | -                                     | -                                             | -                    | <5   | <5   | 6.4 (0.2 to 35.6)                     | 0.4 (-0.1 to 2.8)        | 2.3                   | 19471                |
| Vagina and Vulva     | Head and Neck                    | <5  | <5   | 2.1 (0.6 to 5.5)                      | 1.1 (-0.4 to 4.3)                             | 8.2                  | 0    | -    | -                                     | -                        | -                     | 19471                |
| Vagina and Vulva     | Kidney and Renal Pelvis          | <5  | <5   | 1.9 (0.5 to 4.8)                      | 1 (-0.5 to 4.2)                               | 7.2                  | <5   | <5   | 2.8 (0.1 to 15.8)                     | 0.3 (-0.2 to 2.7)        | 1.8                   | 19471                |
| Vagina and Vulva     | Liver and Intrahepatic Bile Duct | <5  | <5   | 1.3 (0 to 7.4)                        | 0.1 (-0.4 to 2.5)                             | 0.9                  | <5   | <5   | 1.8 (0 to 10)                         | 0.2 (-0.3 to 2.6)        | 1.2                   | 19471                |
| Vagina and Vulva     | Lung and Bronchus                | 18  | 8.1  | <b>2.2 (1.3 to 3.5)</b>               | <b>5.1 (1.3 to 10.4)</b>                      | 38.2                 | 16   | 5.4  | <b>3 (1.7 to 4.8)</b>                 | <b>5.4 (1.9 to 10.6)</b> | 29.2                  | 19471                |
| Vagina and Vulva     | Melanoma of the Skin             | <5  | <5   | 0.8 (0.2 to 2)                        | -0.6 (-2.1 to 2.6)                            | -                    | <5   | <5   | 11.7 (3.2 to 30)                      | 1.9 (0.4 to 5.1)         | 10.1                  | 19471                |
| Vagina and Vulva     | Myeloma                          | <5  | <5   | 1.1 (0 to 5.9)                        | 0 (-0.5 to 2.4)                               | 0.2                  | 0    | -    | -                                     | -                        | -                     | 19471                |
| Vagina and Vulva     | Ovary                            | <5  | <5   | 0.3 (0 to 1.8)                        | -1.1 (-1.6 to 1.3)                            | -                    | <5   | <5   | 2.1 (0.4 to 6.3)                      | 0.8 (-0.4 to 3.8)        | 4.4                   | 19471                |
| Vagina and Vulva     | Soft Tissue including Heart      | <5  | <5   | 5.3 (1.1 to 15.5)                     | 1.3 (0 to 4.2)                                | 9.4                  | <5   | <5   | 8.3 (1 to 30)                         | 0.9 (0 to 3.6)           | 4.9                   | 19471                |
| Vagina and Vulva     | Stomach                          | <5  | <5   | 1.2 (0 to 6.8)                        | 0.1 (-0.4 to 2.4)                             | 0.7                  | <5   | <5   | 2.6 (0.1 to 14.5)                     | 0.3 (-0.2 to 2.7)        | 1.7                   | 19471                |
| Vagina and Vulva     | Urinary Bladder                  | <5  | <5   | 0.7 (0 to 4.1)                        | -0.2 (-0.7 to 2.2)                            | -                    | <5   | <5   | 5.1 (0.1 to 28.3)                     | 0.4 (-0.1 to 2.8)        | 2.2                   | 19471                |

<sup>a</sup>For a given first AYA cancer, denominator for the percentage calculation is the sum of higher-than-expected AElS (>0) of each type of SPC and remaining SPCs in this table.

<sup>b</sup>For a given first AYA cancer, denominator for the percentage calculation is the sum of higher-than-expected AEMs (>0) for each type of SPC and remaining SPCs not shown in this table.

Supplementary Table 4. Associations between first course receipt of treatment and the risk of developing subsequent primary cancer

| FPC                      | Radiotherapy, No/Unknown;<br>Chemotherapy, No/Unknown |          |                     | Radiotherapy, Yes; Chemotherapy,<br>No/Unknown |          |                      | Radiotherapy, No/Unknown;<br>Chemotherapy, Yes |          |                      | Radiotherapy, Yes; Chemotherapy, Yes |          |                       | P       |
|--------------------------|-------------------------------------------------------|----------|---------------------|------------------------------------------------|----------|----------------------|------------------------------------------------|----------|----------------------|--------------------------------------|----------|-----------------------|---------|
|                          | Persons                                               | Observed | SIR (95% CI)        | Persons                                        | Observed | SIR (95% CI)         | Persons                                        | Observed | SIR (95% CI)         | Persons                              | Observed | SIR (95% CI)          |         |
| <b>Breast (F)</b>        |                                                       |          |                     |                                                |          |                      |                                                |          |                      |                                      |          |                       |         |
| Thyroid                  | 10,277                                                | 326      | 1.03 (0.92 to 1.15) | 8,741                                          | 194      | 1.21 (1.04 to 1.39)  | 23                                             | <5       | 0.95 (0.02 to 5.27)  | 36                                   | <5       | 0 (0 to 3.53)         | 0.14    |
| Cervix Uteri             | 8,003                                                 | 226      | 0.73 (0.63 to 0.83) | 1,343                                          | 40       | 0.62 (0.44 to 0.84)  | 97                                             | <5       | 0.47 (0.01 to 2.64)  | 871                                  | 13       | 1.01 (0.54 to 1.72)   | 0.66    |
| Corpus Uteri, NOS        | 2,819                                                 | 58       | 0.64 (0.48 to 0.82) | 526                                            | 17       | 0.69 (0.4 to 1.11)   | 167                                            | <5       | 0.81 (0.17 to 2.37)  | 96                                   | <5       | 0 (0 to 2.64)         | 0.57    |
| Ovary                    | 2,077                                                 | 53       | 0.71 (0.53 to 0.92) | 174                                            | 5        | 0.59 (0.19 to 1.37)  | 1,744                                          | 40       | 0.93 (0.66 to 1.26)  | 71                                   | <5       | 1.1 (0.23 to 3.22)    | 0.64    |
| Colon and Rectum         | 1,766                                                 | 75       | 1.22 (0.96 to 1.53) | 77                                             | <5       | 0.26 (0.01 to 1.48)  | 695                                            | 17       | 1.23 (0.71 to 1.96)  | 368                                  | 6        | 0.87 (0.32 to 1.9)    | 0.21    |
| Head and Neck            | 1,145                                                 | 25       | 0.7 (0.46 to 1.04)  | 670                                            | 24       | 1.21 (0.77 to 1.8)   | 11                                             | <5       | 3.27 (0.08 to 18.21) | 266                                  | <5       | 0.78 (0.16 to 2.29)   | 0.20    |
| Non-Hodgkin Lymphoma     | 955                                                   | 21       | 1.03 (0.64 to 1.57) | 331                                            | 16       | 1.45 (0.83 to 2.36)  | 1,687                                          | 54       | 1.47 (1.1 to 1.92)   | 875                                  | 38       | 1.98 (1.4 to 2.72)    | 0.31    |
| Hodgkin Lymphoma (F)     | 637                                                   | 37       | 2.43 (1.71 to 3.35) | 1,707                                          | 253      | 4.27 (3.76 to 4.83)  | 2,165                                          | 67       | 1.96 (1.52 to 2.5)   | 2,041                                | 109      | 3.52 (2.89 to 4.25)   | 3.0E-07 |
| Bones and Joints         | 428                                                   | 14       | 1.23 (0.67 to 2.07) | 53                                             | <5       | 0.78 (0.02 to 4.35)  | 255                                            | 13       | 3.4 (1.81 to 5.81)   | 75                                   | 3        | 3.32 (0.69 to 9.71)   | 0.14    |
| <b>Colon and Rectum</b>  |                                                       |          |                     |                                                |          |                      |                                                |          |                      |                                      |          |                       |         |
| Breast (F)               | 8,149                                                 | 61       | 0.85 (0.65 to 1.09) | 3,228                                          | 26       | 1.1 (0.72 to 1.6)    | 7,048                                          | 36       | 1.14 (0.8 to 1.58)   | 8,751                                | 26       | 0.9 (0.59 to 1.32)    | 0.45    |
| Cervix Uteri             | 8,003                                                 | 53       | 0.94 (0.7 to 1.23)  | 1,343                                          | 42       | 3.33 (2.4 to 4.5)    | 97                                             | <5       | 8.44 (1.74 to 24.66) | 871                                  | 9        | 4.27 (1.95 to 8.11)   | 1.2E-10 |
| Testis                   | 6,407                                                 | 32       | 0.95 (0.65 to 1.35) | 5,537                                          | 53       | 1.2 (0.9 to 1.57)    | 4,376                                          | 30       | 1.57 (1.06 to 2.24)  | 181                                  | 5        | 3.25 (1.05 to 7.58)   | 0.06    |
| Brain and ONS            | 2,894                                                 | 9        | 1.1 (0.5 to 2.09)   | 2,189                                          | 6        | 0.86 (0.31 to 1.86)  | 198                                            | <5       | 0 (0 to 12.75)       | 1,218                                | <5       | 1.23 (0.25 to 3.59)   | 0.84    |
| Corpus Uteri, NOS        | 2,819                                                 | 32       | 1.91 (1.31 to 2.7)  | 526                                            | 28       | 5.86 (3.89 to 8.47)  | 167                                            | 5        | 7.44 (2.42 to 17.36) | 96                                   | <5       | 16.41 (4.47 to 42.02) | 1.9E-06 |
| Head and Neck            | 2,412                                                 | 15       | 0.85 (0.48 to 1.41) | 1,466                                          | <5       | 0.41 (0.11 to 1.06)  | 42                                             | <5       | 0 (0 to 19.63)       | 763                                  | <5       | 0.45 (0.01 to 2.53)   | 0.48    |
| Non-Hodgkin Lymphoma     | 2,240                                                 | 6        | 0.59 (0.22 to 1.28) | 795                                            | 6        | 1.11 (0.41 to 2.42)  | 4,395                                          | 20       | 1.08 (0.66 to 1.67)  | 2,044                                | 8        | 0.91 (0.39 to 1.8)    | 0.50    |
| Ovary                    | 2,077                                                 | 26       | 1.93 (1.26 to 2.82) | 174                                            | 5        | 3.21 (1.04 to 7.49)  | 1,744                                          | 26       | 3.5 (2.28 to 5.12)   | 71                                   | <5       | 4.04 (0.49 to 14.61)  | 0.19    |
| Hodgkin Lymphoma (M)     | 708                                                   | <5       | 0.51 (0.06 to 1.84) | 1,621                                          | 17       | 1.44 (0.84 to 2.31)  | 2,597                                          | 22       | 2.25 (1.41 to 3.4)   | 1,928                                | 10       | 1.57 (0.75 to 2.9)    | 0.07    |
| Hodgkin Lymphoma (F)     | 637                                                   | 7        | 2.81 (1.13 to 5.79) | 1,707                                          | 21       | 2.22 (1.37 to 3.39)  | 2,165                                          | 8        | 1.44 (0.62 to 2.84)  | 2,041                                | 12       | 2.43 (1.26 to 4.25)   | 0.55    |
| <b>Head and Neck</b>     |                                                       |          |                     |                                                |          |                      |                                                |          |                      |                                      |          |                       |         |
| Breast (F)               | 8,149                                                 | 24       | 1.18 (0.76 to 1.76) | 3,228                                          | 7        | 1.02 (0.41 to 2.1)   | 7,048                                          | 20       | 2.18 (1.33 to 3.37)  | 8,751                                | 19       | 2.3 (1.39 to 3.59)    | 0.07    |
| Testis                   | 6,407                                                 | 17       | 0.74 (0.43 to 1.18) | 5,537                                          | 19       | 0.62 (0.38 to 0.98)  | 4,376                                          | 15       | 1.15 (0.65 to 1.9)   | 181                                  | <5       | 2.88 (0.59 to 8.43)   | 0.12    |
| Brain and ONS            | 2,894                                                 | <5       | 0.98 (0.27 to 2.52) | 2,189                                          | 13       | 3.47 (1.85 to 5.94)  | 198                                            | <5       | 0 (0 to 25.15)       | 1,218                                | <5       | 3.28 (0.89 to 8.39)   | 0.11    |
| Non-Hodgkin Lymphoma     | 2,240                                                 | 16       | 3.02 (1.73 to 4.91) | 795                                            | 8        | 2.85 (1.23 to 5.61)  | 4,395                                          | 24       | 2.4 (1.54 to 3.58)   | 2,044                                | 14       | 3.05 (1.67 to 5.13)   | 0.89    |
| Hodgkin Lymphoma (M)     | 708                                                   | 8        | 2.99 (1.29 to 5.9)  | 1,621                                          | 17       | 2.06 (1.2 to 3.31)   | 2,597                                          | 7        | 1.07 (0.43 to 2.21)  | 1,928                                | 9        | 2.2 (1.01 to 4.18)    | 0.20    |
| Hodgkin Lymphoma (F)     | 637                                                   | <5       | 4 (0.82 to 11.68)   | 1,707                                          | 19       | 6.46 (3.89 to 10.09) | 2,165                                          | 7        | 4.23 (1.7 to 8.72)   | 2,041                                | 8        | 5.42 (2.34 to 10.69)  | 0.62    |
| <b>Lung and Bronchus</b> |                                                       |          |                     |                                                |          |                      |                                                |          |                      |                                      |          |                       |         |
| Breast (F)               | 8,149                                                 | 122      | 1.11 (0.92 to 1.33) | 3,228                                          | 64       | 1.9 (1.46 to 2.42)   | 7,048                                          | 45       | 1.12 (0.82 to 1.5)   | 8,751                                | 62       | 2.04 (1.57 to 2.62)   | 2.1E-04 |
| Cervix Uteri             | 8,003                                                 | 99       | 1.3 (1.06 to 1.58)  | 1,343                                          | 28       | 1.51 (1.01 to 2.19)  | 97                                             | <5       | 5.53 (0.67 to 19.99) | 871                                  | 6        | 3.2 (1.17 to 6.97)    | 0.14    |
| Testis                   | 6,407                                                 | 19       | 0.58 (0.35 to 0.91) | 5,537                                          | 51       | 1.05 (0.78 to 1.39)  | 4,376                                          | 35       | 2.01 (1.4 to 2.8)    | 181                                  | <5       | 2.13 (0.58 to 5.44)   | 7.9E-05 |
| Colon and Rectum         | 3,461                                                 | 32       | 0.98 (0.67 to 1.38) | 180                                            | <5       | 1.12 (0.23 to 3.26)  | 1,370                                          | <5       | 0.51 (0.11 to 1.5)   | 832                                  | <5       | 1.75 (0.48 to 4.49)   | 0.43    |
| Brain and ONS            | 2,894                                                 | 14       | 1.82 (1 to 3.06)    | 2,189                                          | 5        | 0.72 (0.23 to 1.68)  | 198                                            | <5       | 0 (0 to 18.57)       | 1,218                                | <5       | 1.95 (0.53 to 4.99)   | 0.25    |
| Non-Hodgkin Lymphoma     | 2,240                                                 | 18       | 1.67 (0.99 to 2.63) | 795                                            | 15       | 2.26 (1.26 to 3.72)  | 4,395                                          | 35       | 1.75 (1.22 to 2.43)  | 2,044                                | 18       | 2.06 (1.22 to 3.25)   | 0.78    |
| Hodgkin Lymphoma (M)     | 708                                                   | 18       | 4.6 (2.72 to 7.26)  | 1,621                                          | 72       | 5.62 (4.4 to 7.08)   | 2,597                                          | 25       | 2.83 (1.83 to 4.17)  | 1,928                                | 30       | 5.6 (3.78 to 8)       | 0.01    |
| Hodgkin Lymphoma (F)     | 637                                                   | 10       | 3.65 (1.75 to 6.71) | 1,707                                          | 55       | 4.86 (3.66 to 6.32)  | 2,165                                          | 18       | 3.39 (2.01 to 5.36)  | 2,041                                | 20       | 4.46 (2.72 to 6.88)   | 0.73    |
| <b>Thyroid</b>           |                                                       |          |                     |                                                |          |                      |                                                |          |                      |                                      |          |                       |         |
| Breast (F)               | 8,149                                                 | 37       | 1.04 (0.73 to 1.44) | 3,228                                          | 10       | 0.74 (0.35 to 1.36)  | 7,048                                          | 26       | 1.11 (0.73 to 1.63)  | 8,751                                | 38       | 1.42 (1.01 to 1.95)   | 0.32    |
| Testis                   | 6,407                                                 | 10       | 1.13 (0.54 to 2.07) | 5,537                                          | 18       | 1.84 (1.09 to 2.9)   | 4,376                                          | 15       | 2.76 (1.55 to 4.55)  | 181                                  | <5       | 3.22 (0.08 to 17.92)  | 0.15    |
| Colon and Rectum         | 3,461                                                 | 12       | 1.29 (0.66 to 2.25) | 180                                            | <5       | 1.93 (0.05 to 10.77) | 1,370                                          | 5        | 1.77 (0.58 to 4.14)  | 832                                  | <5       | 0.66 (0.02 to 3.67)   | 0.78    |
| Brain and ONS            | 2,894                                                 | 7        | 1.2 (0.48 to 2.48)  | 2,189                                          | 16       | 3.86 (2.21 to 6.27)  | 198                                            | <5       | 0 (0 to 15.8)        | 1,218                                | <5       | 1.16 (0.14 to 4.17)   | 0.03    |
| Head and Neck            | 2,412                                                 | 12       | 1.74 (0.9 to 3.04)  | 1,466                                          | 8        | 2.14 (0.92 to 4.21)  | 42                                             | <5       | 0 (0 to 49.02)       | 763                                  | <5       | 0.91 (0.02 to 5.09)   | 0.71    |
| Non-Hodgkin Lymphoma     | 2,240                                                 | <5       | 0.65 (0.13 to 1.9)  | 795                                            | <5       | 1.93 (0.53 to 4.94)  | 4,395                                          | 17       | 1.96 (1.14 to 3.13)  | 2,044                                | 15       | 3.14 (1.76 to 5.18)   | 0.06    |

|                      |       |    |                     |       |    |                     |       |    |                     |       |    |                      |      |
|----------------------|-------|----|---------------------|-------|----|---------------------|-------|----|---------------------|-------|----|----------------------|------|
| Ovary                | 2,077 | 13 | 1.32 (0.71 to 2.27) | 174   | 5  | 5.23 (1.7 to 12.2)  | 1,744 | 6  | 0.91 (0.33 to 1.99) | 71    | <5 | 7.31 (0.89 to 26.41) | 0.01 |
| Hodgkin Lymphoma (M) | 708   | <5 | 3.11 (0.64 to 9.07) | 1,621 | 14 | 5.17 (2.82 to 8.67) | 2,597 | <5 | 1.1 (0.23 to 3.21)  | 1,928 | 9  | 4.65 (2.12 to 8.82)  | 0.06 |
| Hodgkin Lymphoma (F) | 637   | 11 | 3.95 (1.97 to 7.06) | 1,707 | 42 | 4.48 (3.23 to 6.05) | 2,165 | 26 | 3.53 (2.31 to 5.17) | 2,041 | 24 | 3.34 (2.14 to 4.97)  | 0.91 |
| Cervix Uteri         | 8,003 | 20 | 1.22 (0.75 to 1.89) | 1,343 | 7  | 1.96 (0.79 to 4.04) | 97    | <5 | 0 (0 to 35.7)       | 871   | 1  | 1.7 (0.04 to 9.46)   | b    |

<sup>a</sup>Tested using multi-covariate Poisson regression model that included the observed number of cases as the outcome, the log of the expected number of cases as the offset, and age at diagnosis (15-29, 30-39 years), sex (when appropriate), year of diagnosis (1975-1986, 1987-1999, 2000-2013), time since diagnosis (60-239, ≥240 months) as covariables.

<sup>b</sup>Algorithm not converged

**Supplementary Figure 1.** Standardized incidence ratios and standardized mortality ratios for select subsequent primary cancers by time since first primary cancer diagnosis (5-19, 20+ years) among AYA cancer

**A. Risk of developing subsequent primary cancer**

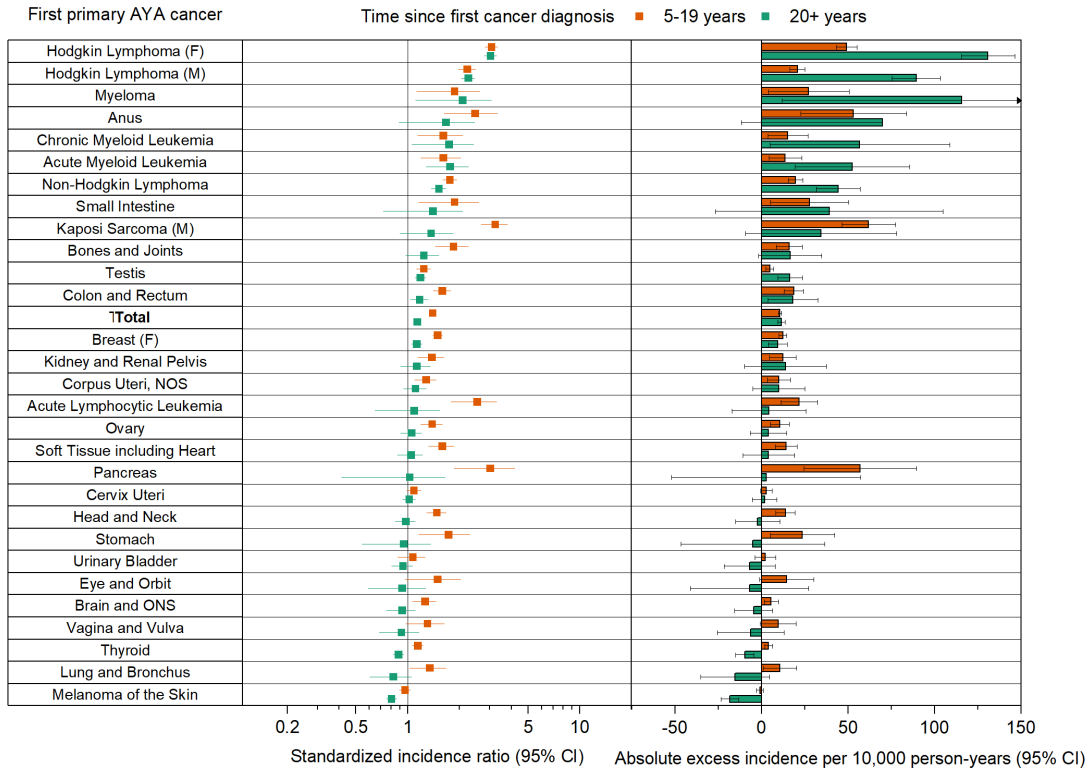

**B. Risk of dying from subsequent primary cancer**

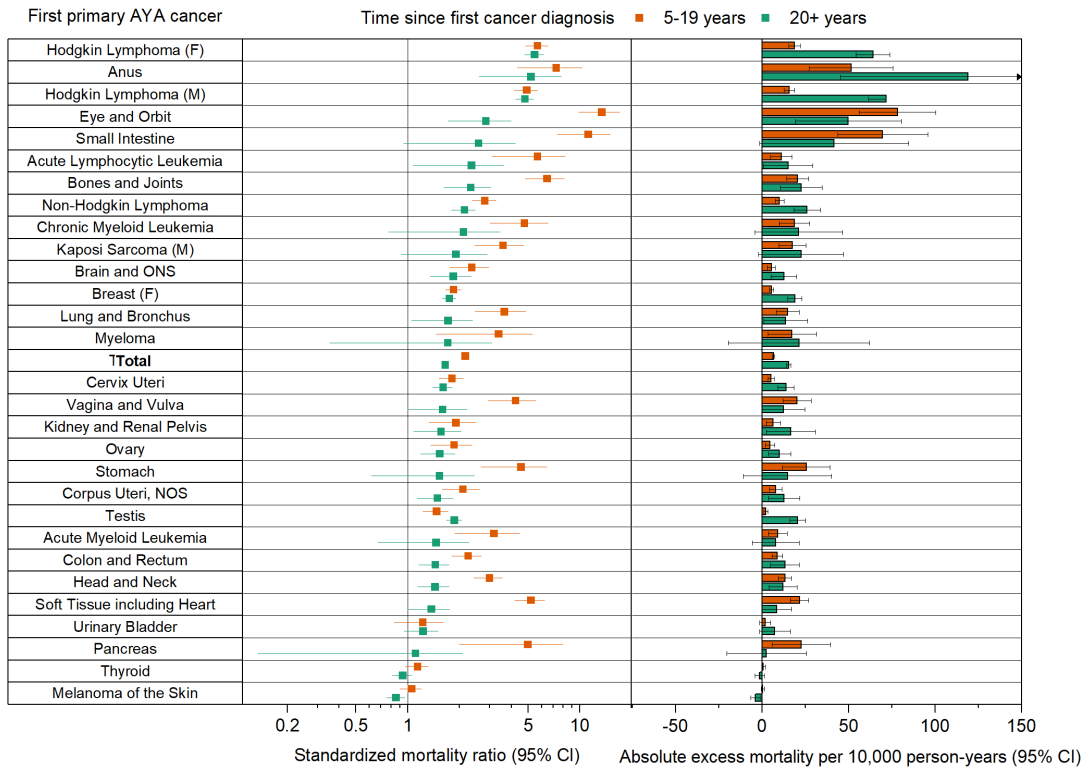

survivors in 9 SEER registries (Figure continues on next page).

**Supplementary Figure 2.** Proportions of cancer types that account for subsequent primary cancer (SPC) cases, excess SPC cases, SPC deaths, and excess SPC deaths among all AYA cancer survivors combined

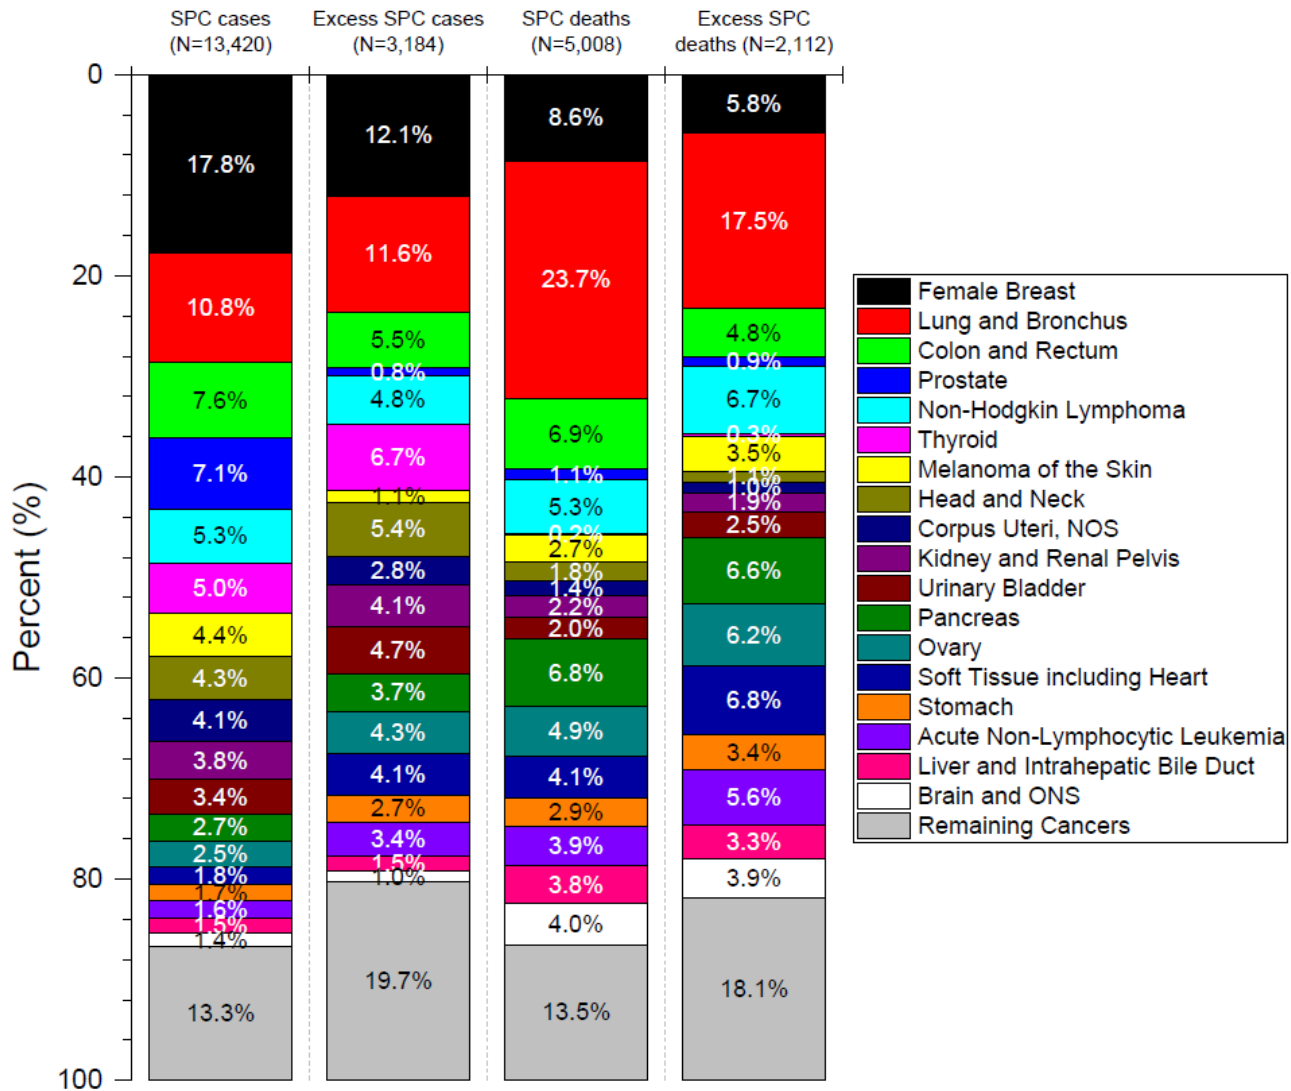

NOTE For the purpose of percentage calculation of specific type of subsequent primary cancers that contributed to the excess number of SPC cases (Excess SPC cases) and SPC deaths (Excess SPC deaths), denominator was obtained by summing observed number of SPC cases with AEI (absolute excess incidence)>0 and observed number of SPC deaths with AEM (absolute excess mortality)>0 from Supplementary Table 3, respectively.

**Supplementary Figure 3.** Standardized incidence ratios for the risk of developing select subsequent primary cancers by years of first AYA cancer diagnosis (1975-1986, 1987-1999, 2000-2013) among AYA cancer survivors in 9 SEER registries

A. Subsequent lung and bronchus cancers

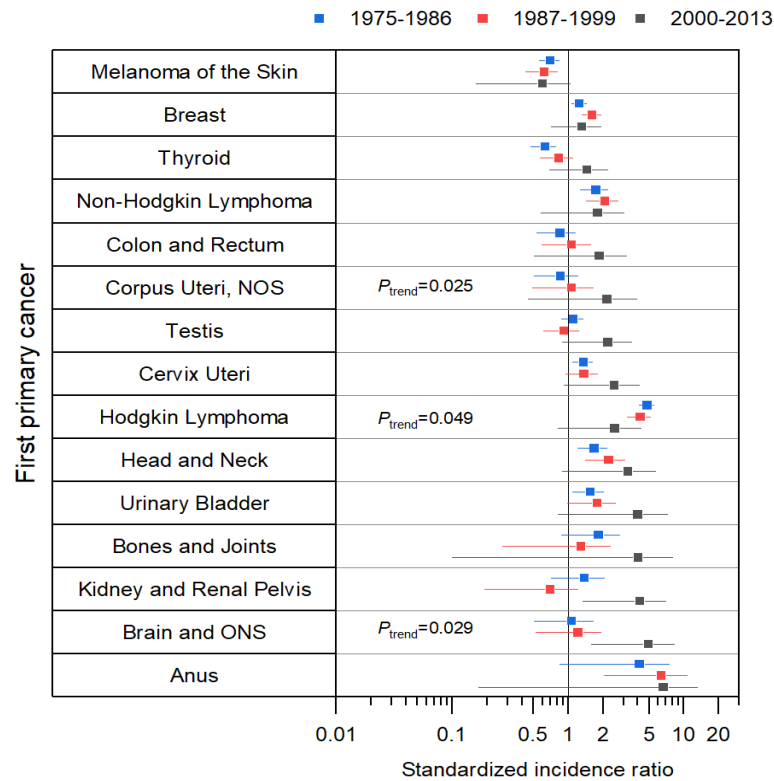

B. Subsequent female breast cancer

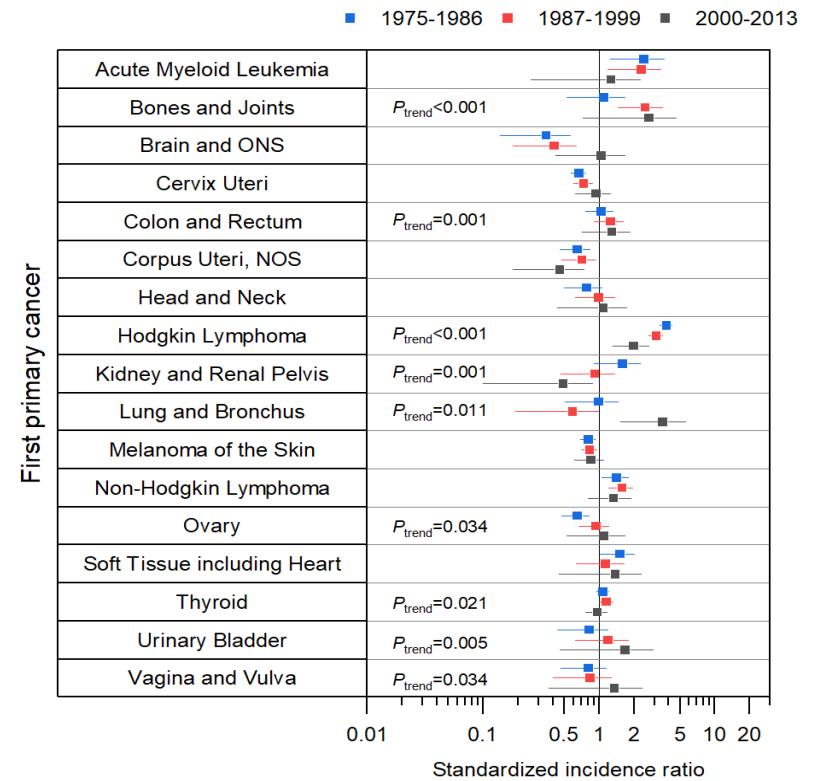

For select SPCs that accounted for the highest proportions of the total excess cases (**Supplementary Figure 2**), multi-covariate Poisson regression was used to test trends in SIRs across years of first primary cancer diagnosis (1975-1986, 1987-1999, 2000-2013).  $P_{trend}$  in the SIRs was obtained using the likelihood ratio test. The model included the observed number of cases as the outcome, year of diagnosis as an explanatory variable, the log of the expected number of cases as the offset, and age at diagnosis (15-19, 20-29, 30-39 years), sex (when appropriate), time since diagnosis (60-119, 120-239, 240-359,  $\geq 360$  months) as covariables.[2, 4] Combining sexes for Hodgkin lymphoma survivors was preferred due to the small number of observed SPCs. No significant difference by sex in the SIR trend was found except for the risk of subsequent head and neck cancer ( $P_{heterogeneity\ by\ sex} < 0.0001$ ). The trend analysis was performed using SAS software (SAS Institute Inc., Cary, NC).



### C. Subsequent thyroid cancer

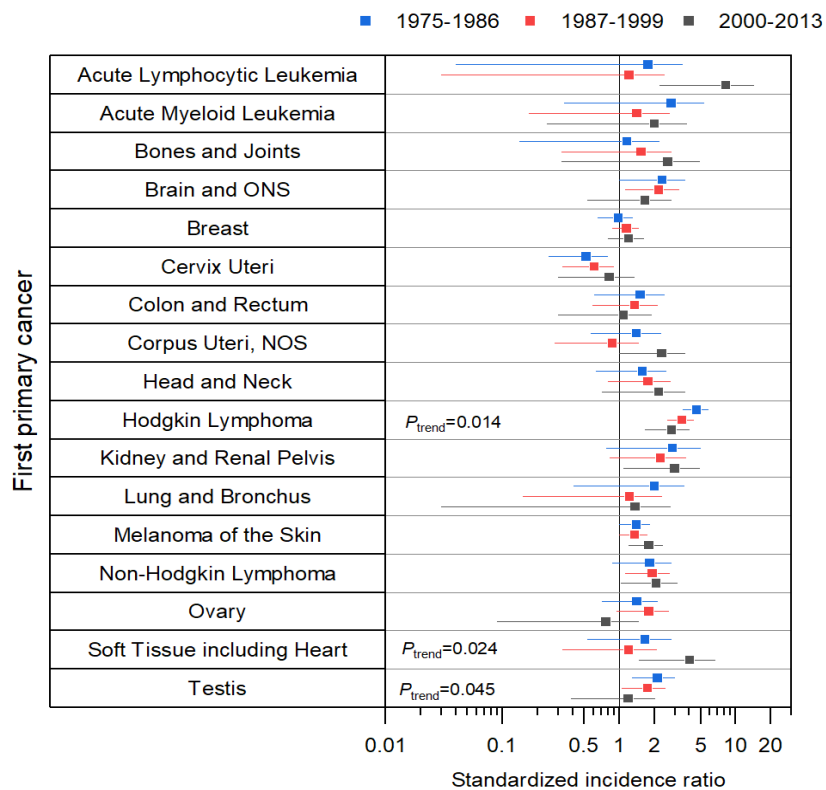

### D. Subsequent colorectal cancer

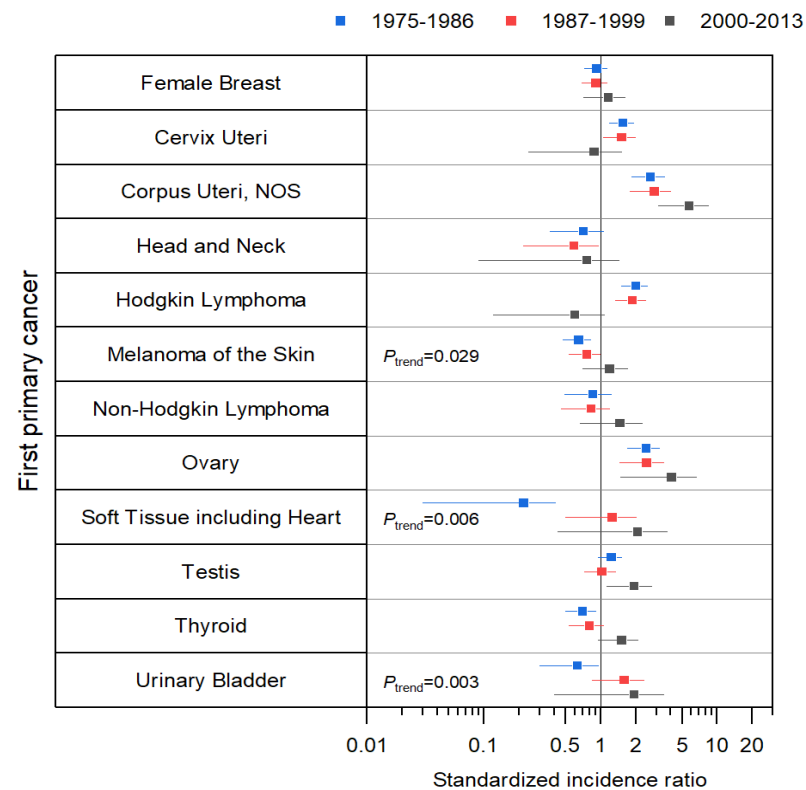

For select SPCs that accounted for the highest proportions of the total excess cases (**Supplementary Figure 2**), multi-covariate Poisson regression was used to test trends in SIRs across years of first primary cancer diagnosis (1975-1986, 1987-1999, 2000-2013).  $P_{trend}$  in the SIRs was obtained using the likelihood ratio test. The model included the observed number of cases as the outcome, year of diagnosis as an explanatory variable, the log of the expected number of cases as the offset, and age at diagnosis (15-19, 20-29, 30-39 years), sex (when appropriate), time since diagnosis (60-119, 120-239, 240-359,  $\geq 360$  months) as covariables.[2, 4] Combining sexes for Hodgkin lymphoma survivors was preferred due to the small number of observed SPCs. No significant difference by sex in the SIR trend was found except for the risk of subsequent head and neck cancer ( $P_{heterogeneity\ by\ sex} < 0.0001$ ). The trend analysis was performed using SAS software (SAS Institute Inc., Cary, NC).

## E. Subsequent head and neck cancers

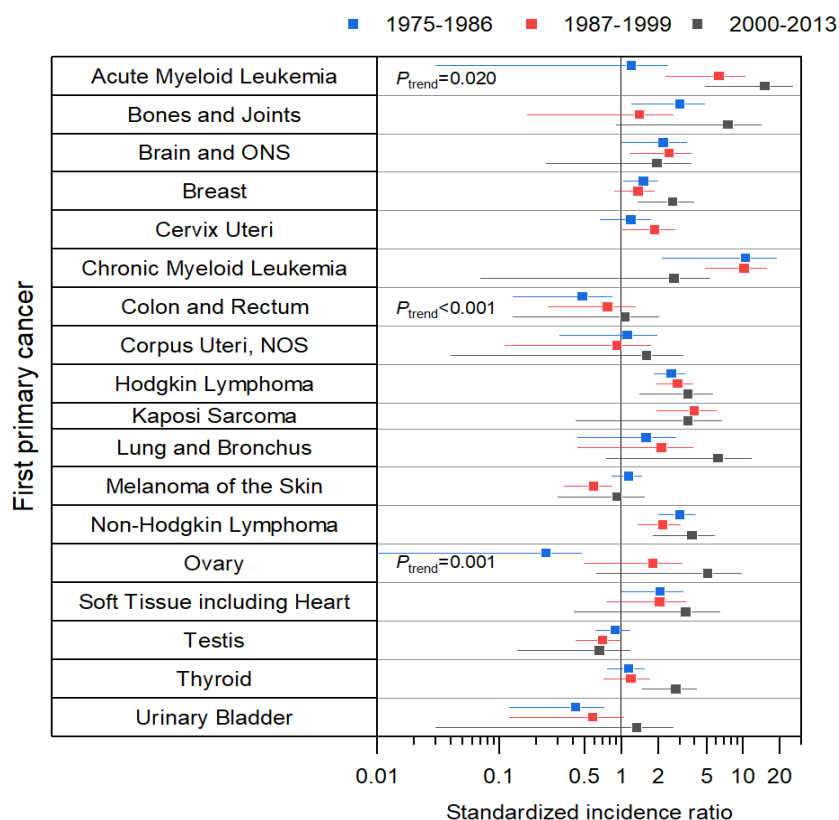

For select SPCs that accounted for the highest proportions of the total excess cases (**Supplementary Figure 2**), multi-covariate Poisson regression was used to test trends in SIRs across years of first primary cancer diagnosis (1975-1986, 1987-1999, 2000-2013).  $P_{trend}$  in the SIRs was obtained using the likelihood ratio test. The model included the observed number of cases as the outcome, year of diagnosis as an explanatory variable, the log of the expected number of cases as the offset, and age at diagnosis (15-19, 20-29, 30-39 years), sex (when appropriate), time since diagnosis (60-119, 120-239, 240-359,  $\geq 360$  months) as covariables.[2, 4] Combining sexes for Hodgkin lymphoma survivors was preferred due to the small number of observed SPCs. No significant difference by sex in the SIR trend was found except for the risk of subsequent head and neck cancers ( $P_{heterogeneity\ by\ sex} < 0.0001$ ). The trend analysis was performed using SAS software (SAS Institute Inc., Cary, NC).
